# Supplementary material for: A Comparison of the Ability of Some Commercially Produced Biological Control Agents to Protect Strawberry Plants against the Plant Pathogen Phytophthora cactorum
Source: MDPI journal article supplement (doi:10.3390/agriculture11111086), 2021-11-02

## Supplementary figures; charts resulting from Principal component analyses

### Captions for all figures:

The results of the Principal component analysis comparing the plants infected by *Phytophthora cactorum* (**P**) with uninfected control plants (**C**), where all the plants were treated by tested BCAs in corresponding variants. The clear differentiation of the clouds of  **P** and  **C** points in charts is interpretable as the result of different growth and different health of infected plants in consequence of pathogen infection, which means no ability of corresponding BCA to protect plants against pathogen. The overlap of both clouds means the low or no differentiation between plants, which could be caused either by the BCAs protecting effect on infected plants, or by the negative influence of BCA alone. The results are based on all ten measured variables characterising the health of plants (Number of fruits, number of blossoms, the weight of fruits, the weight of blossoms, weight of roots, weight of rhizomes, diameter of rhizomes, length of roots, number of healthy leaves, weight of healthy leaves).

# Cultivating room / Sonata / Polyversum

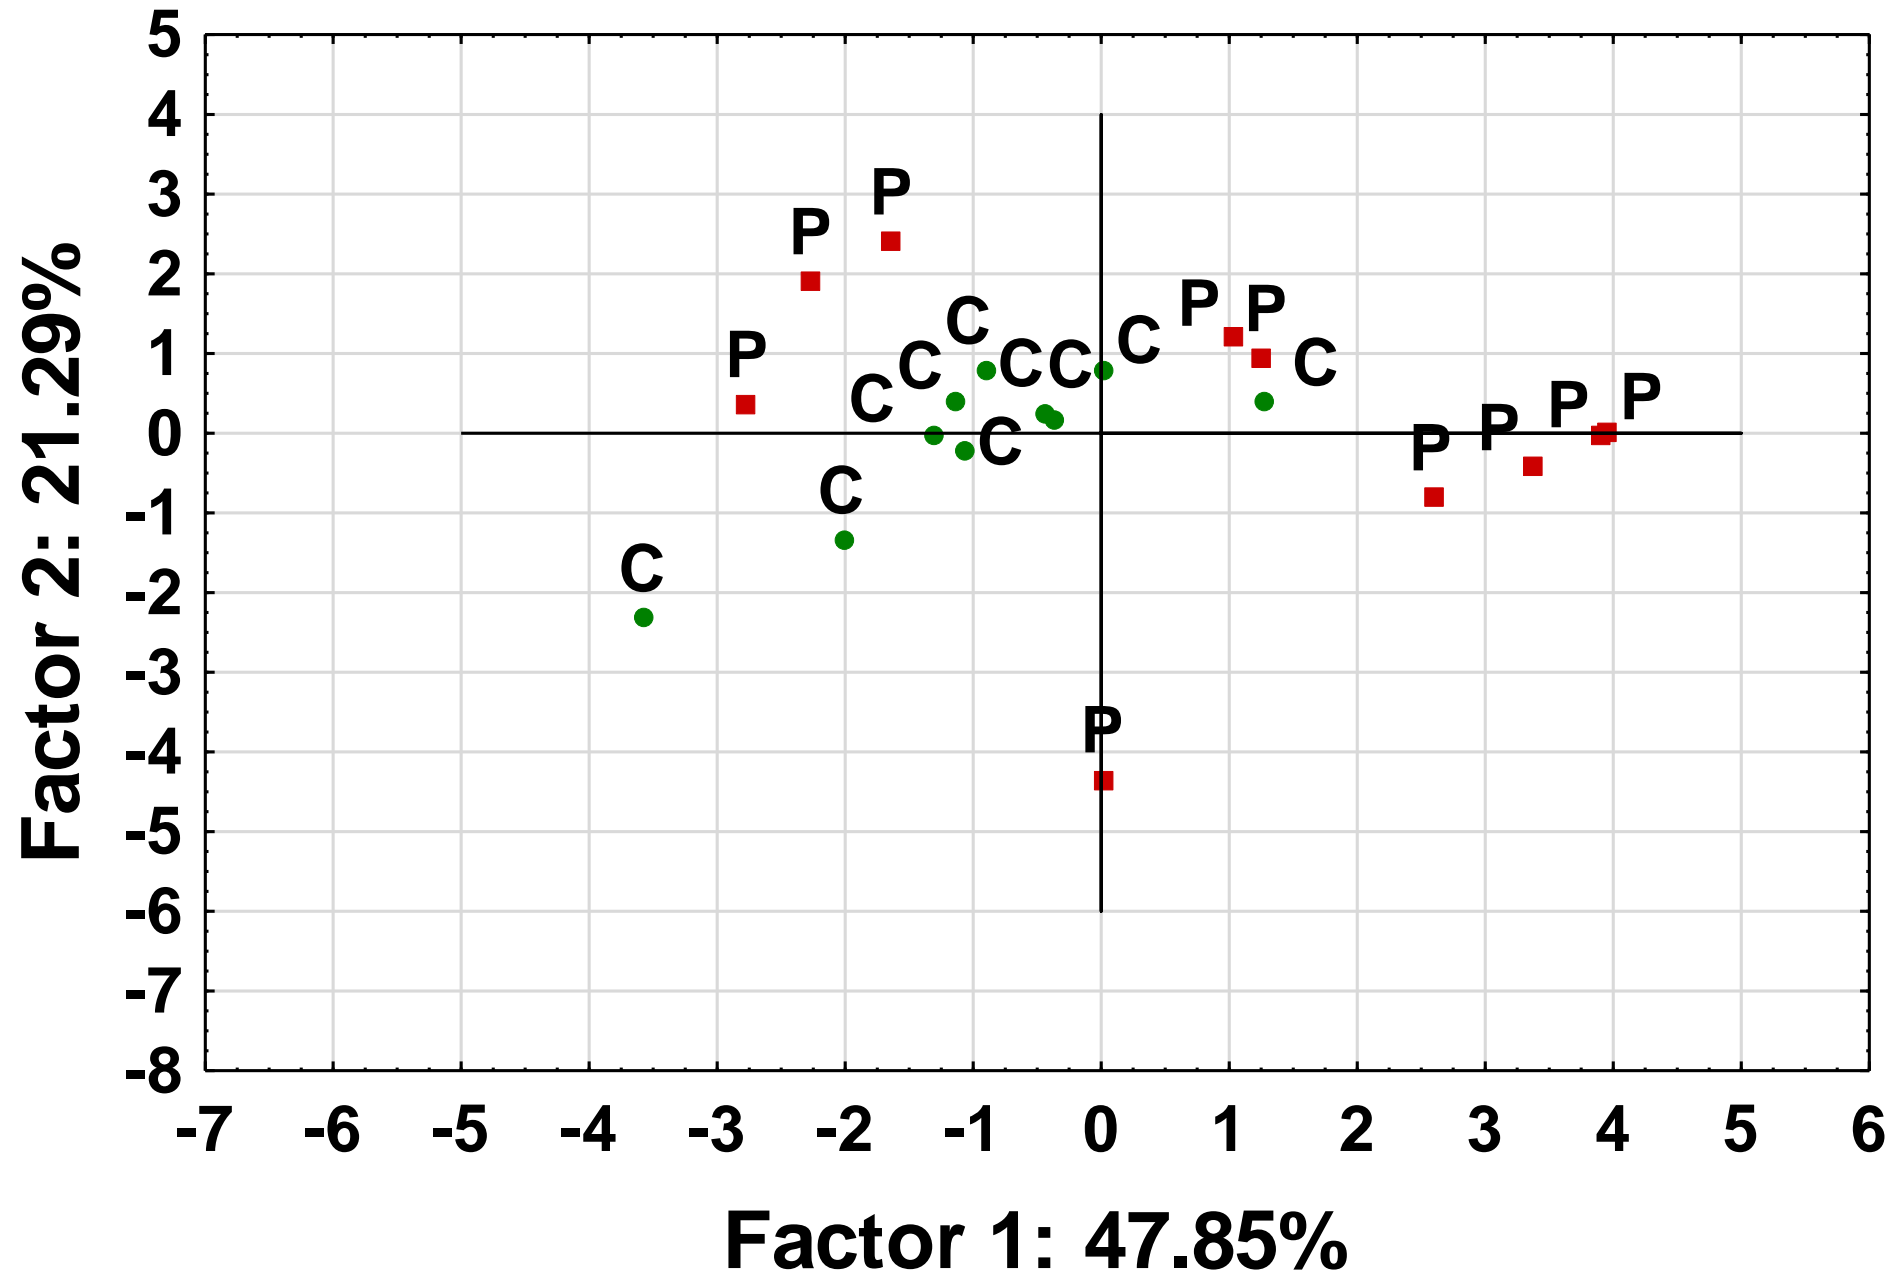

# Cultivating room / Sonata / Clonoplus

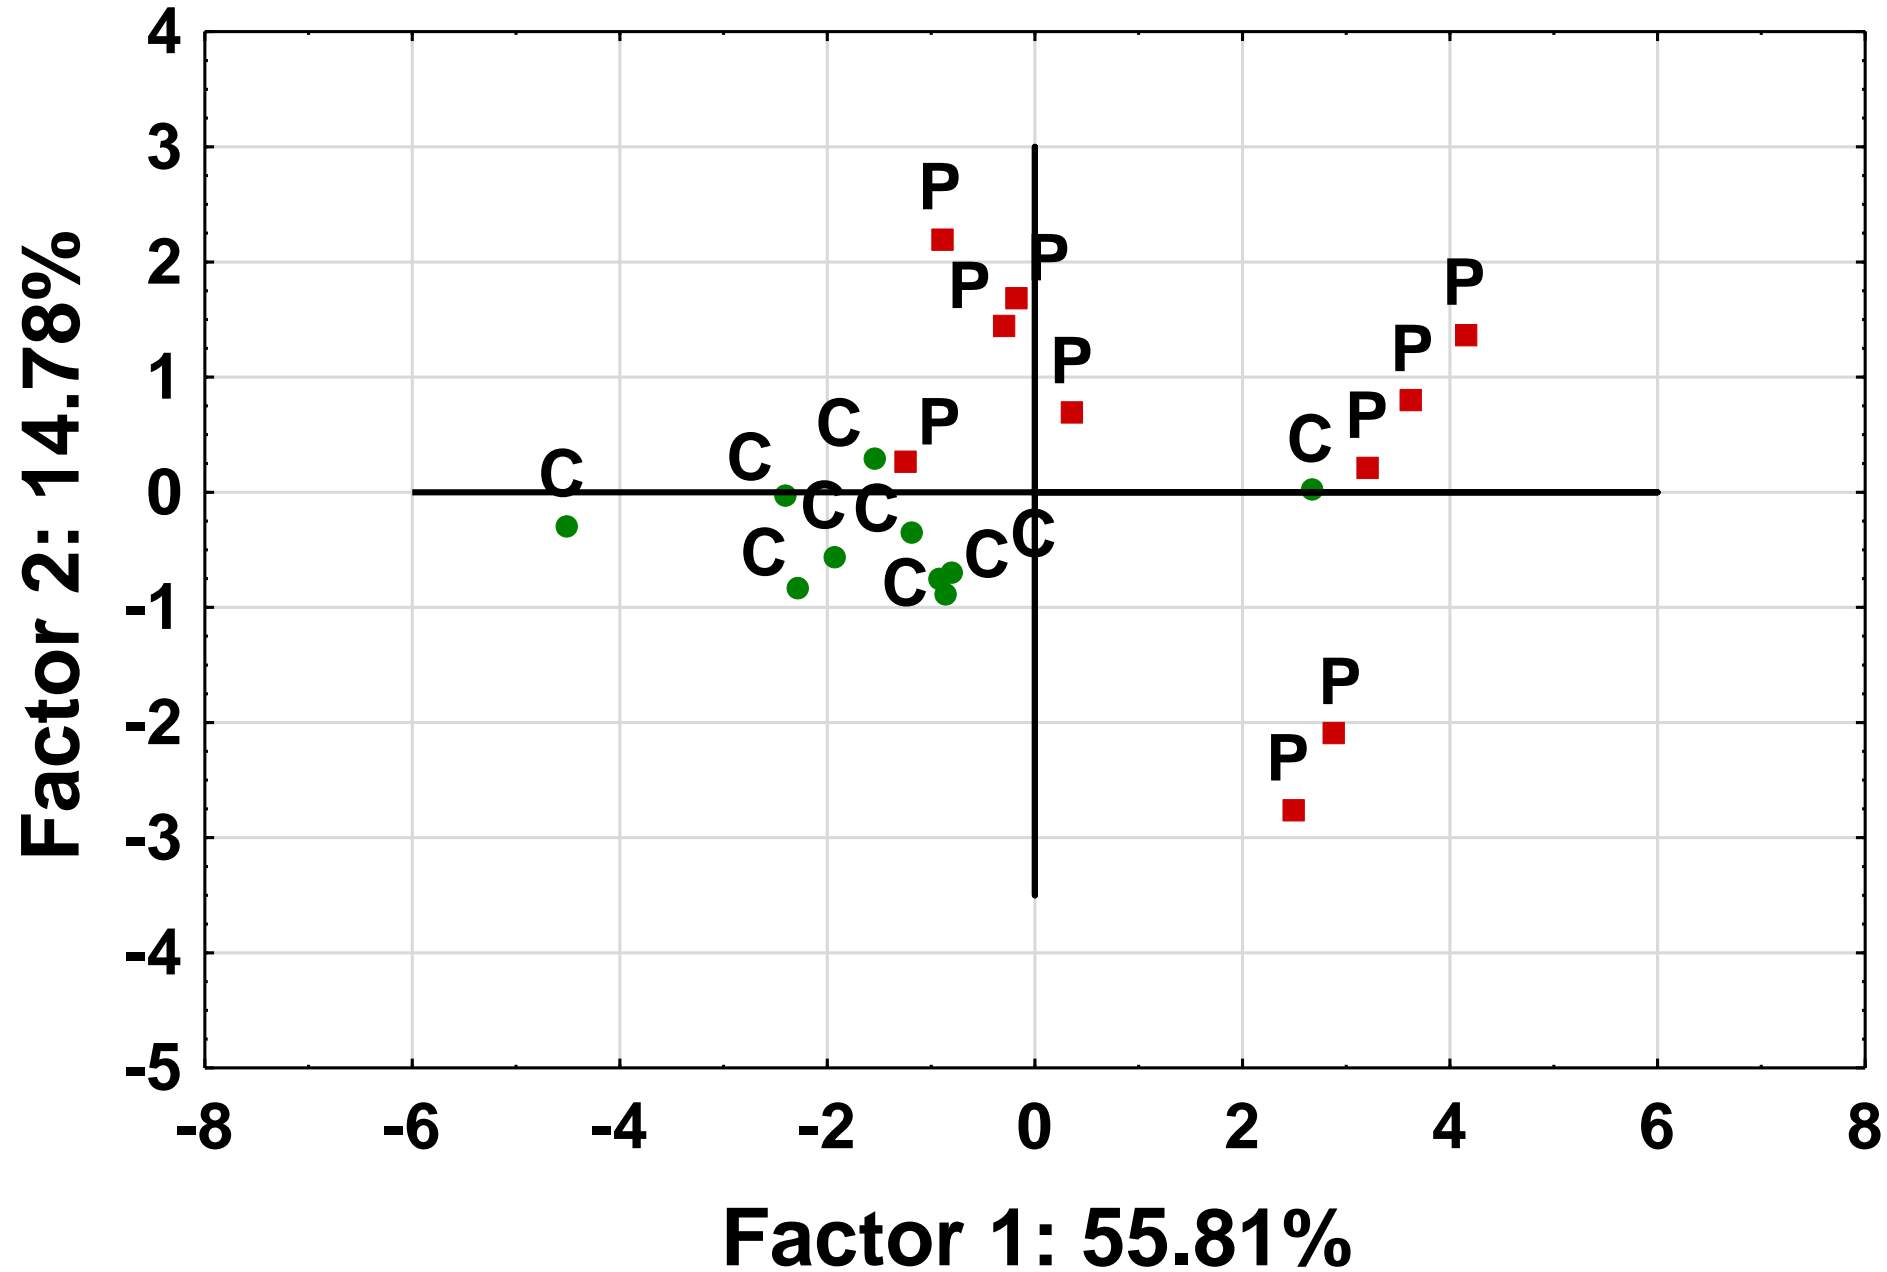

# Cultivating room / Sonata / Aliette

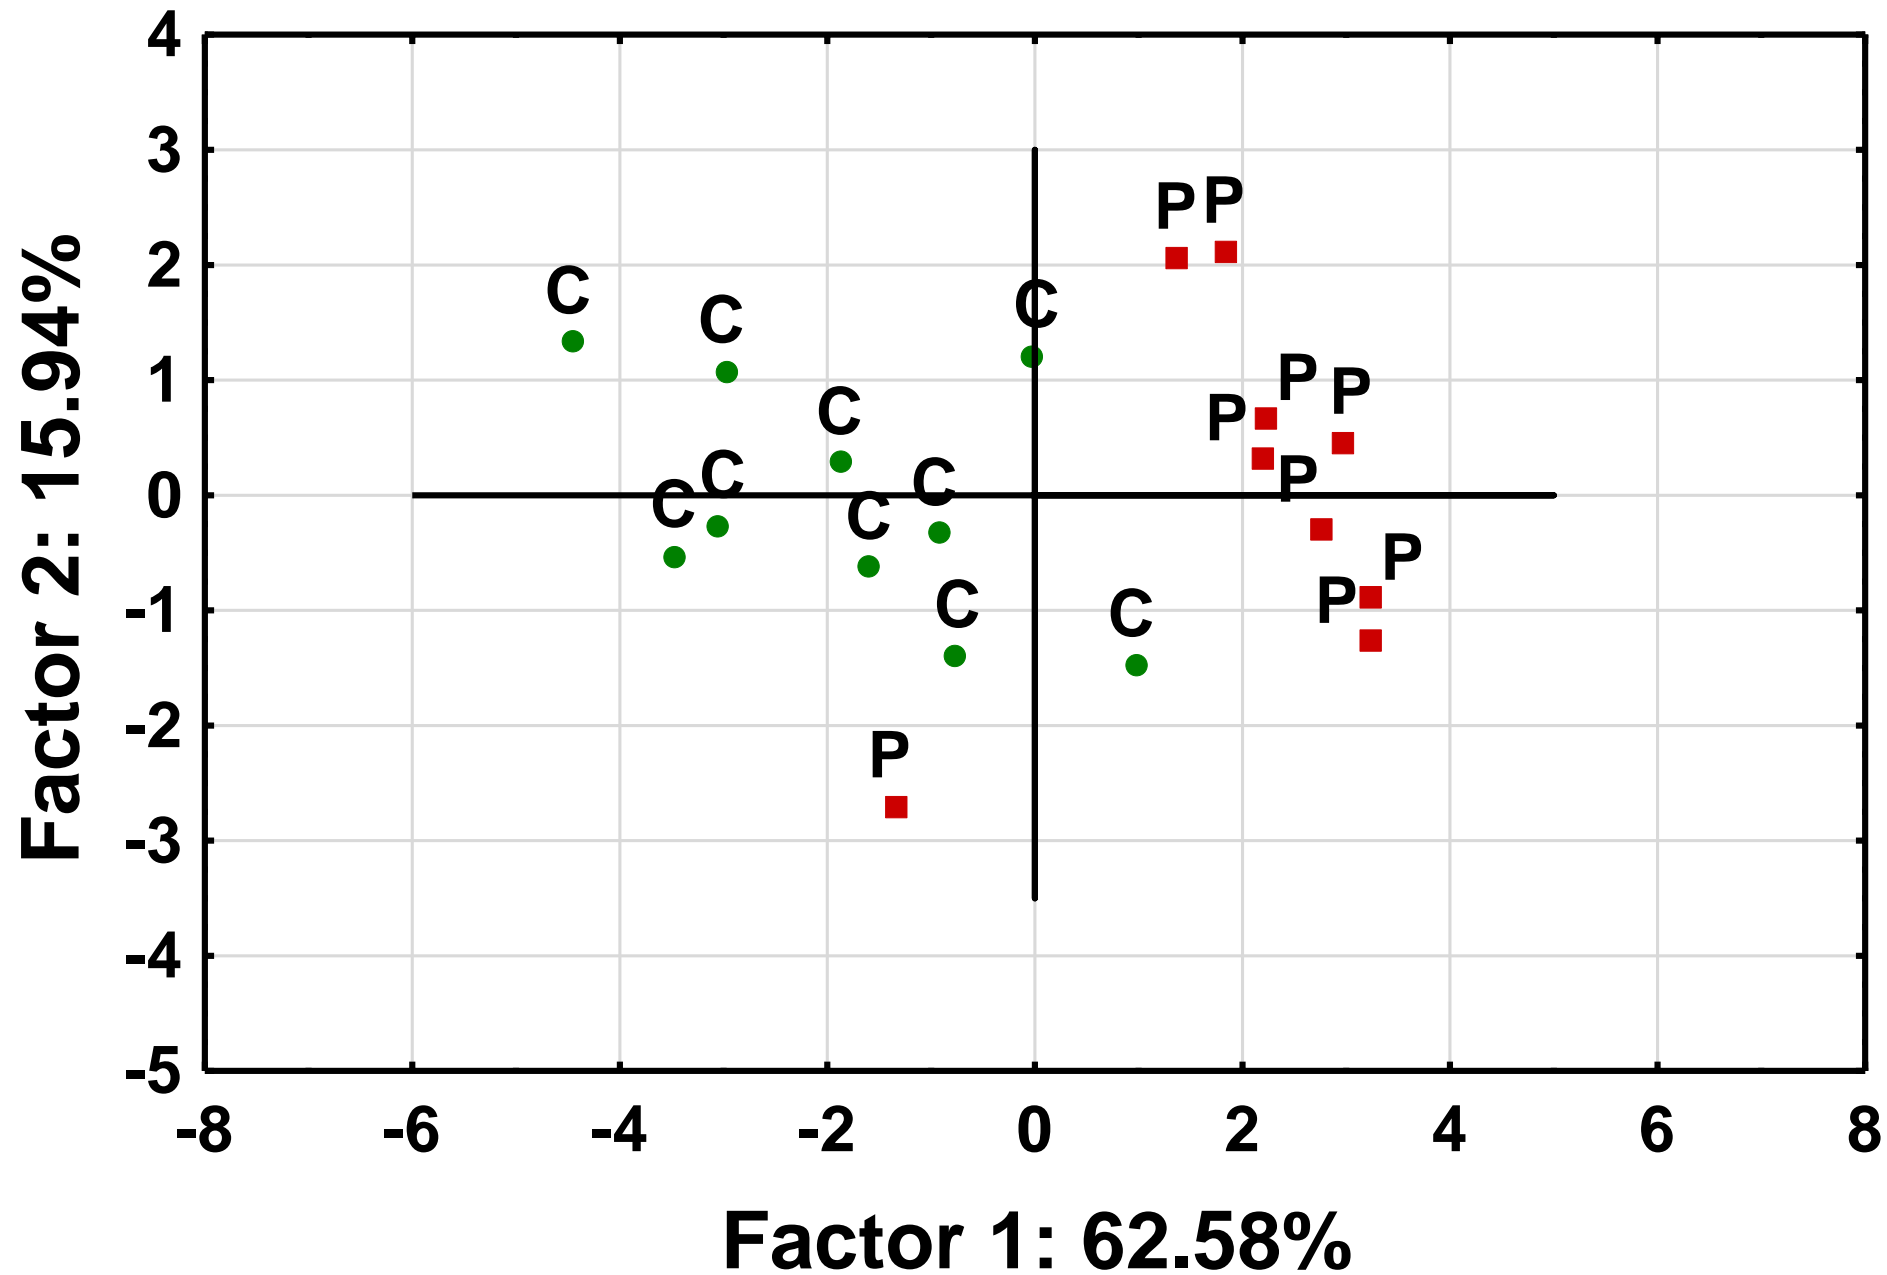

# Cultivating room / Sonata / Contans

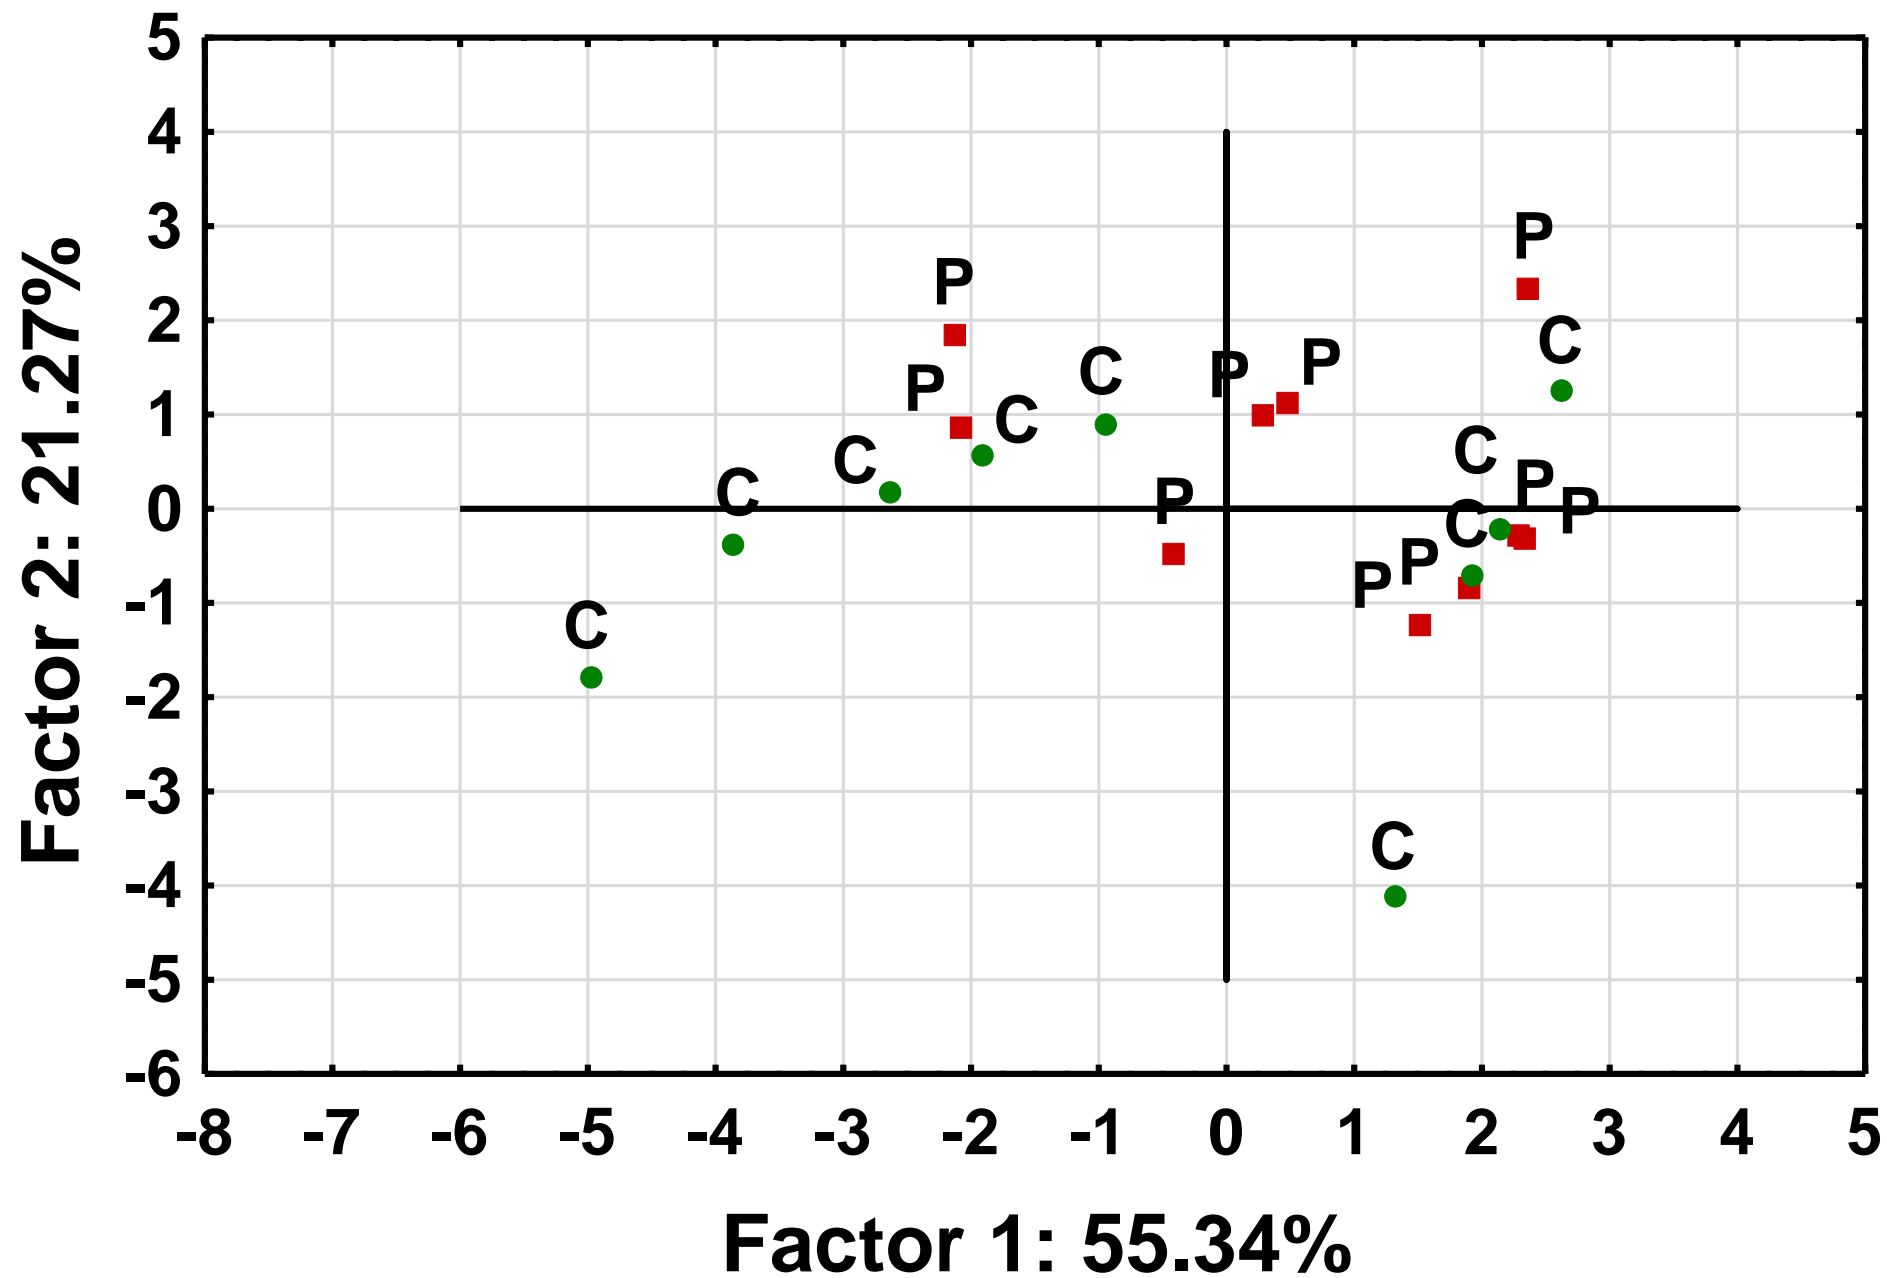

# Cultivating room / Sonata / Gliorex

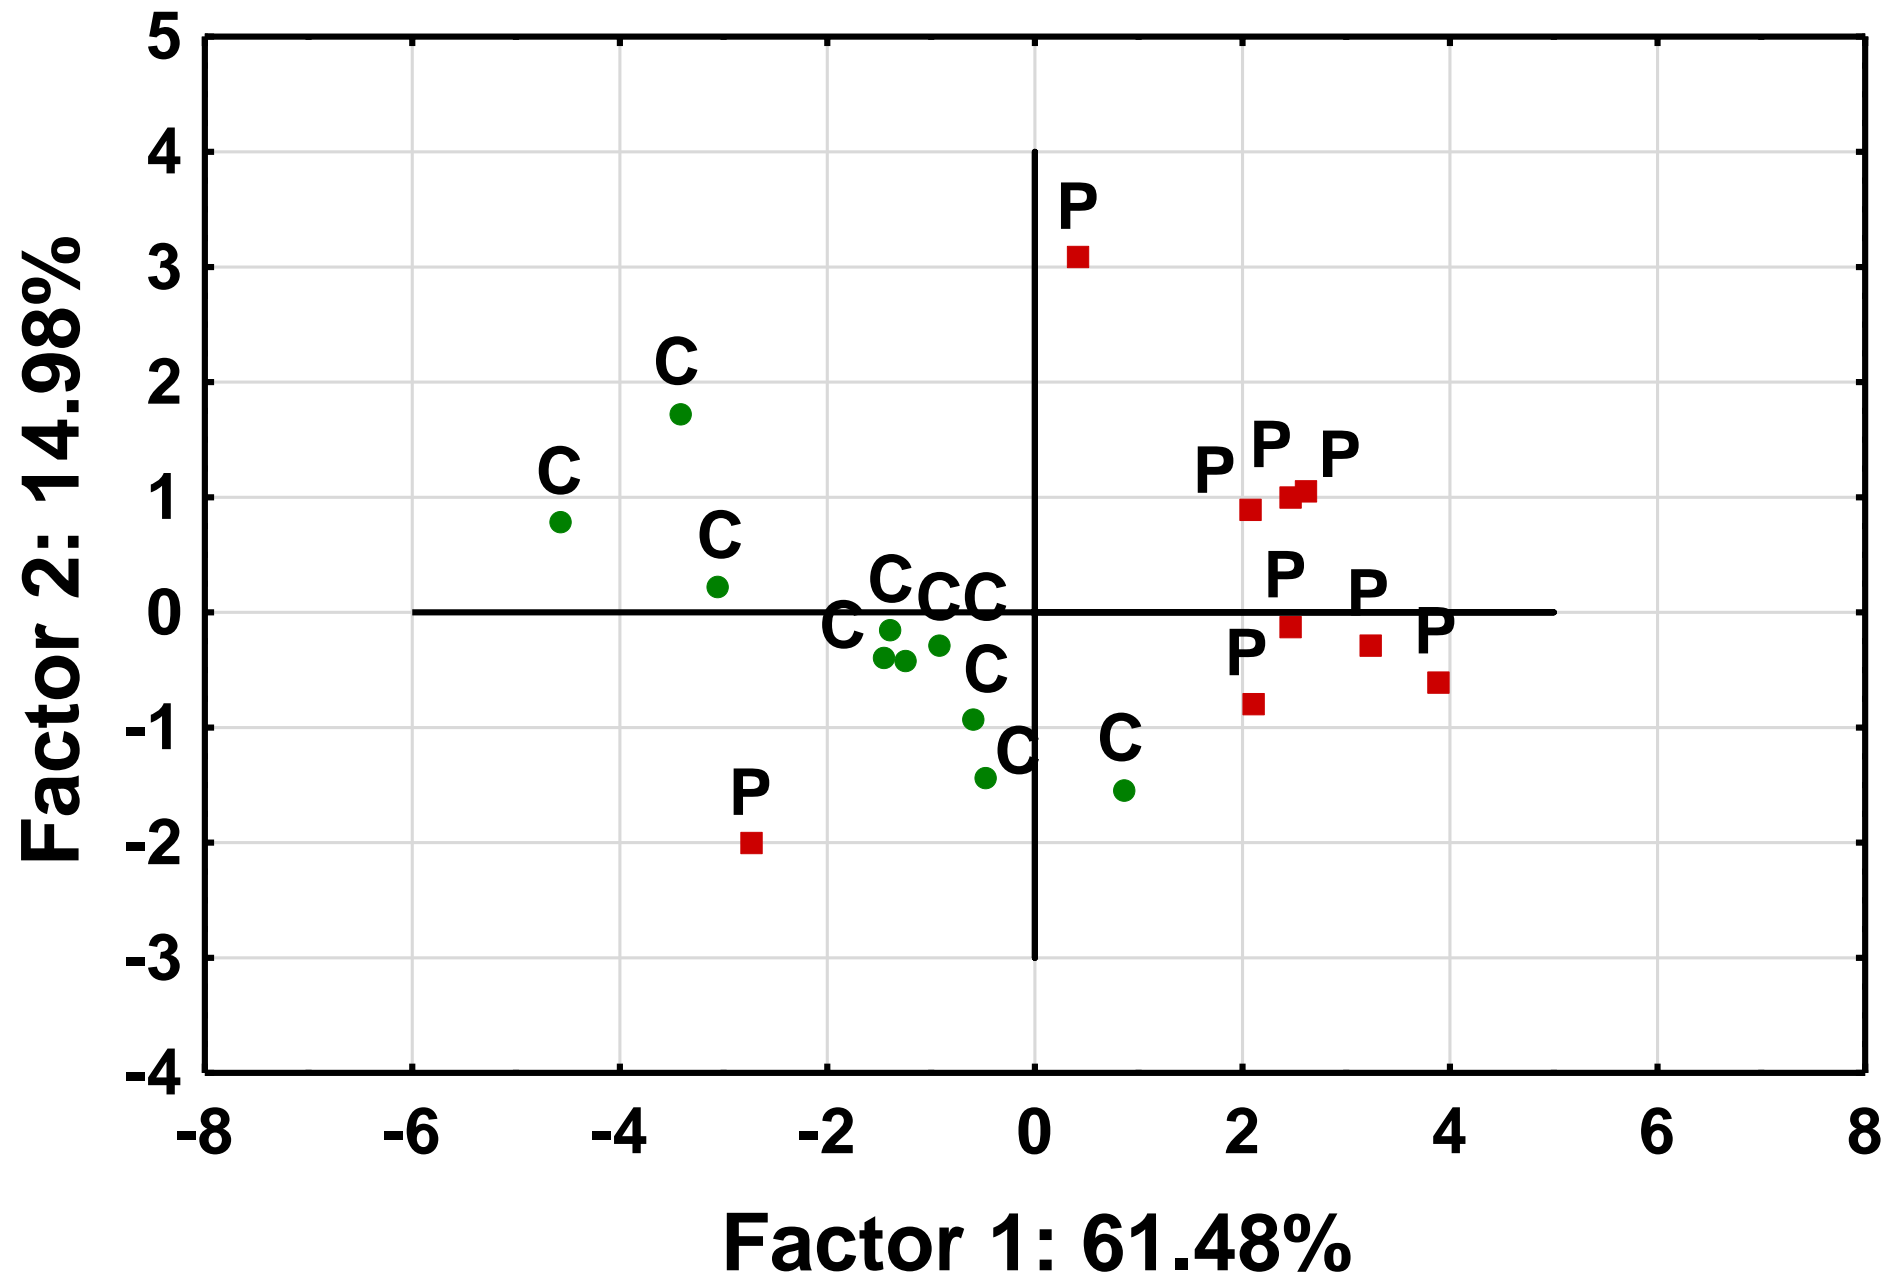

# Cultivating room / Sonata / Integral Pro

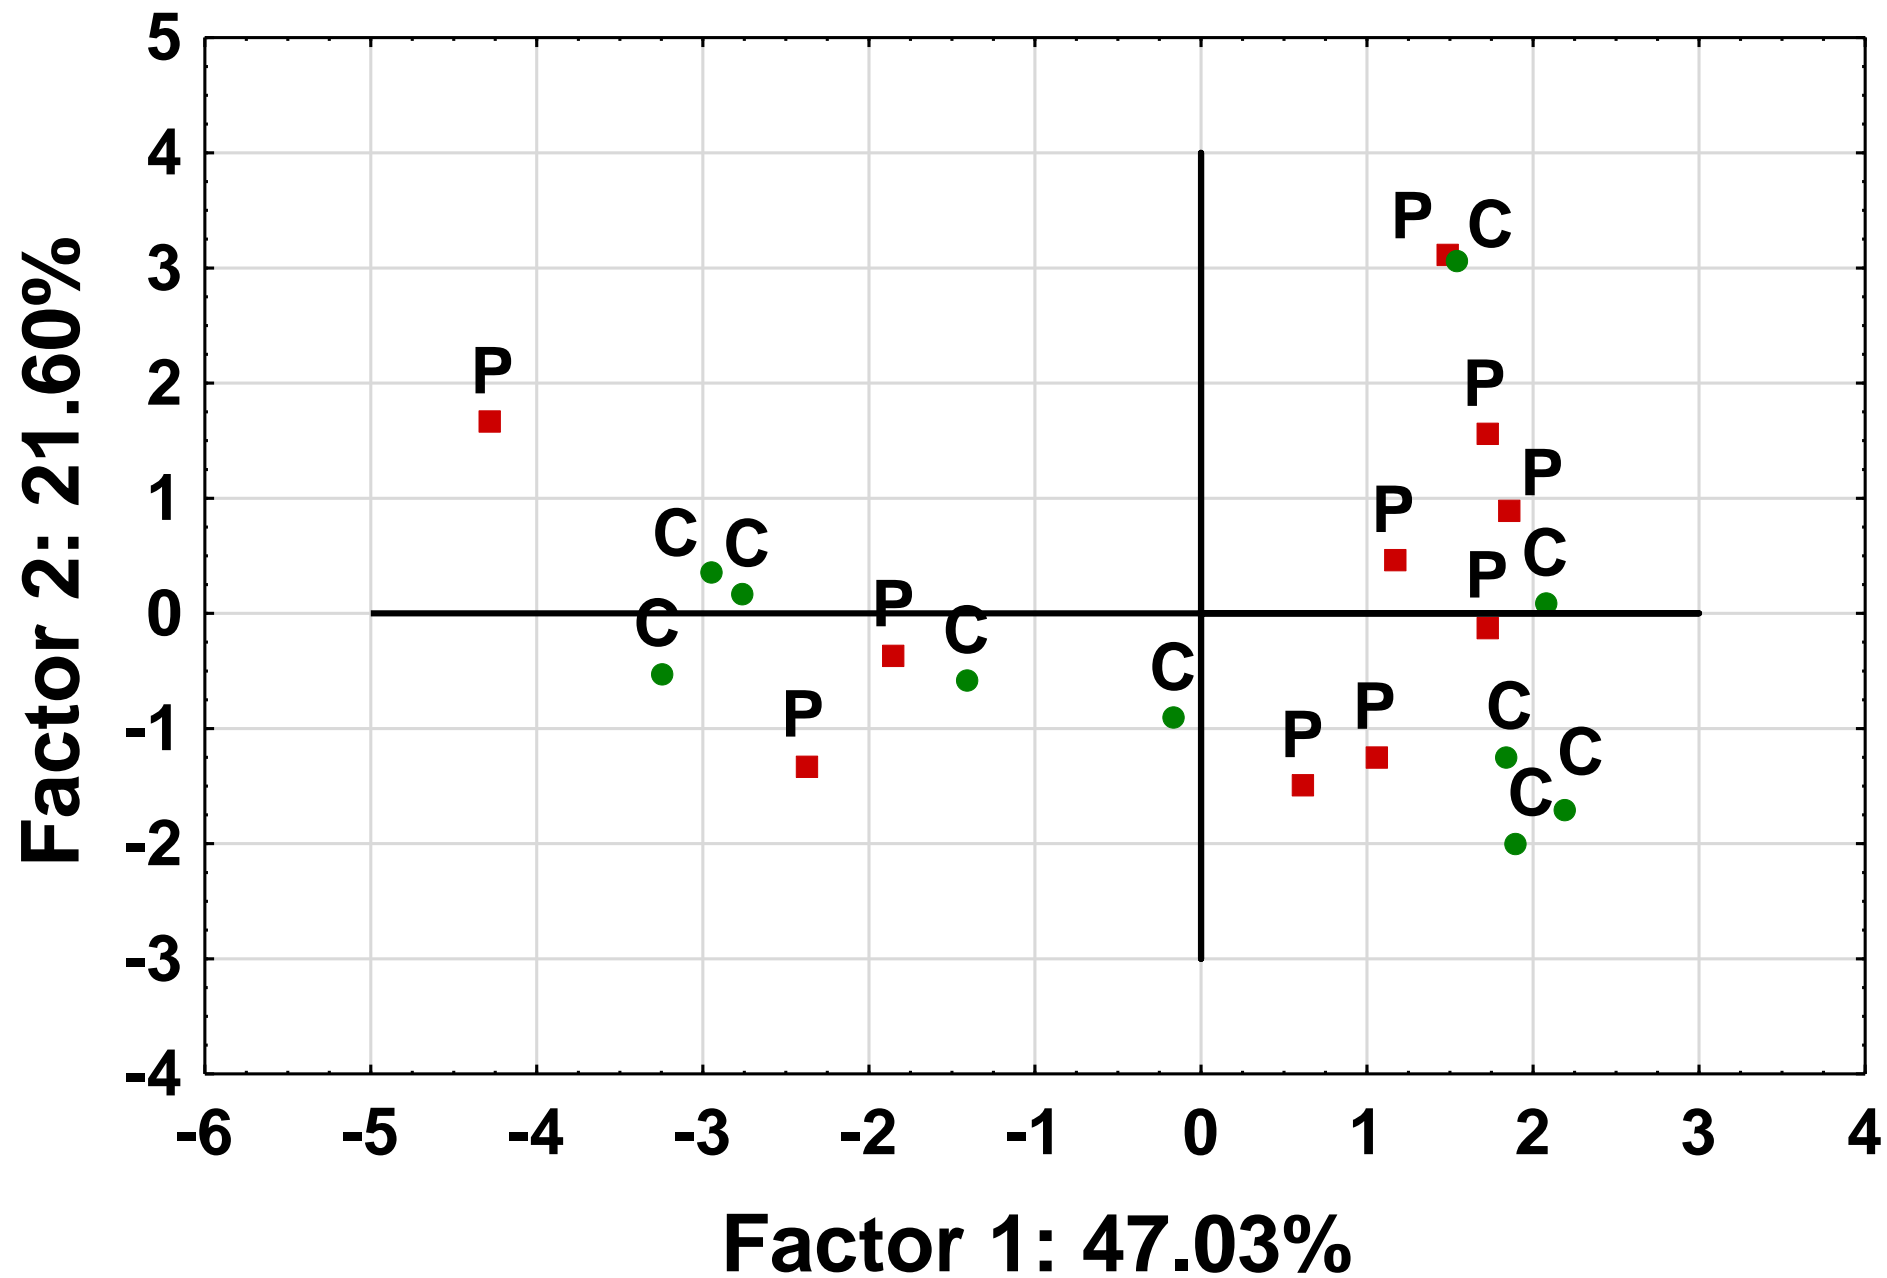

# Cultivating room / Sonata / Hirundo

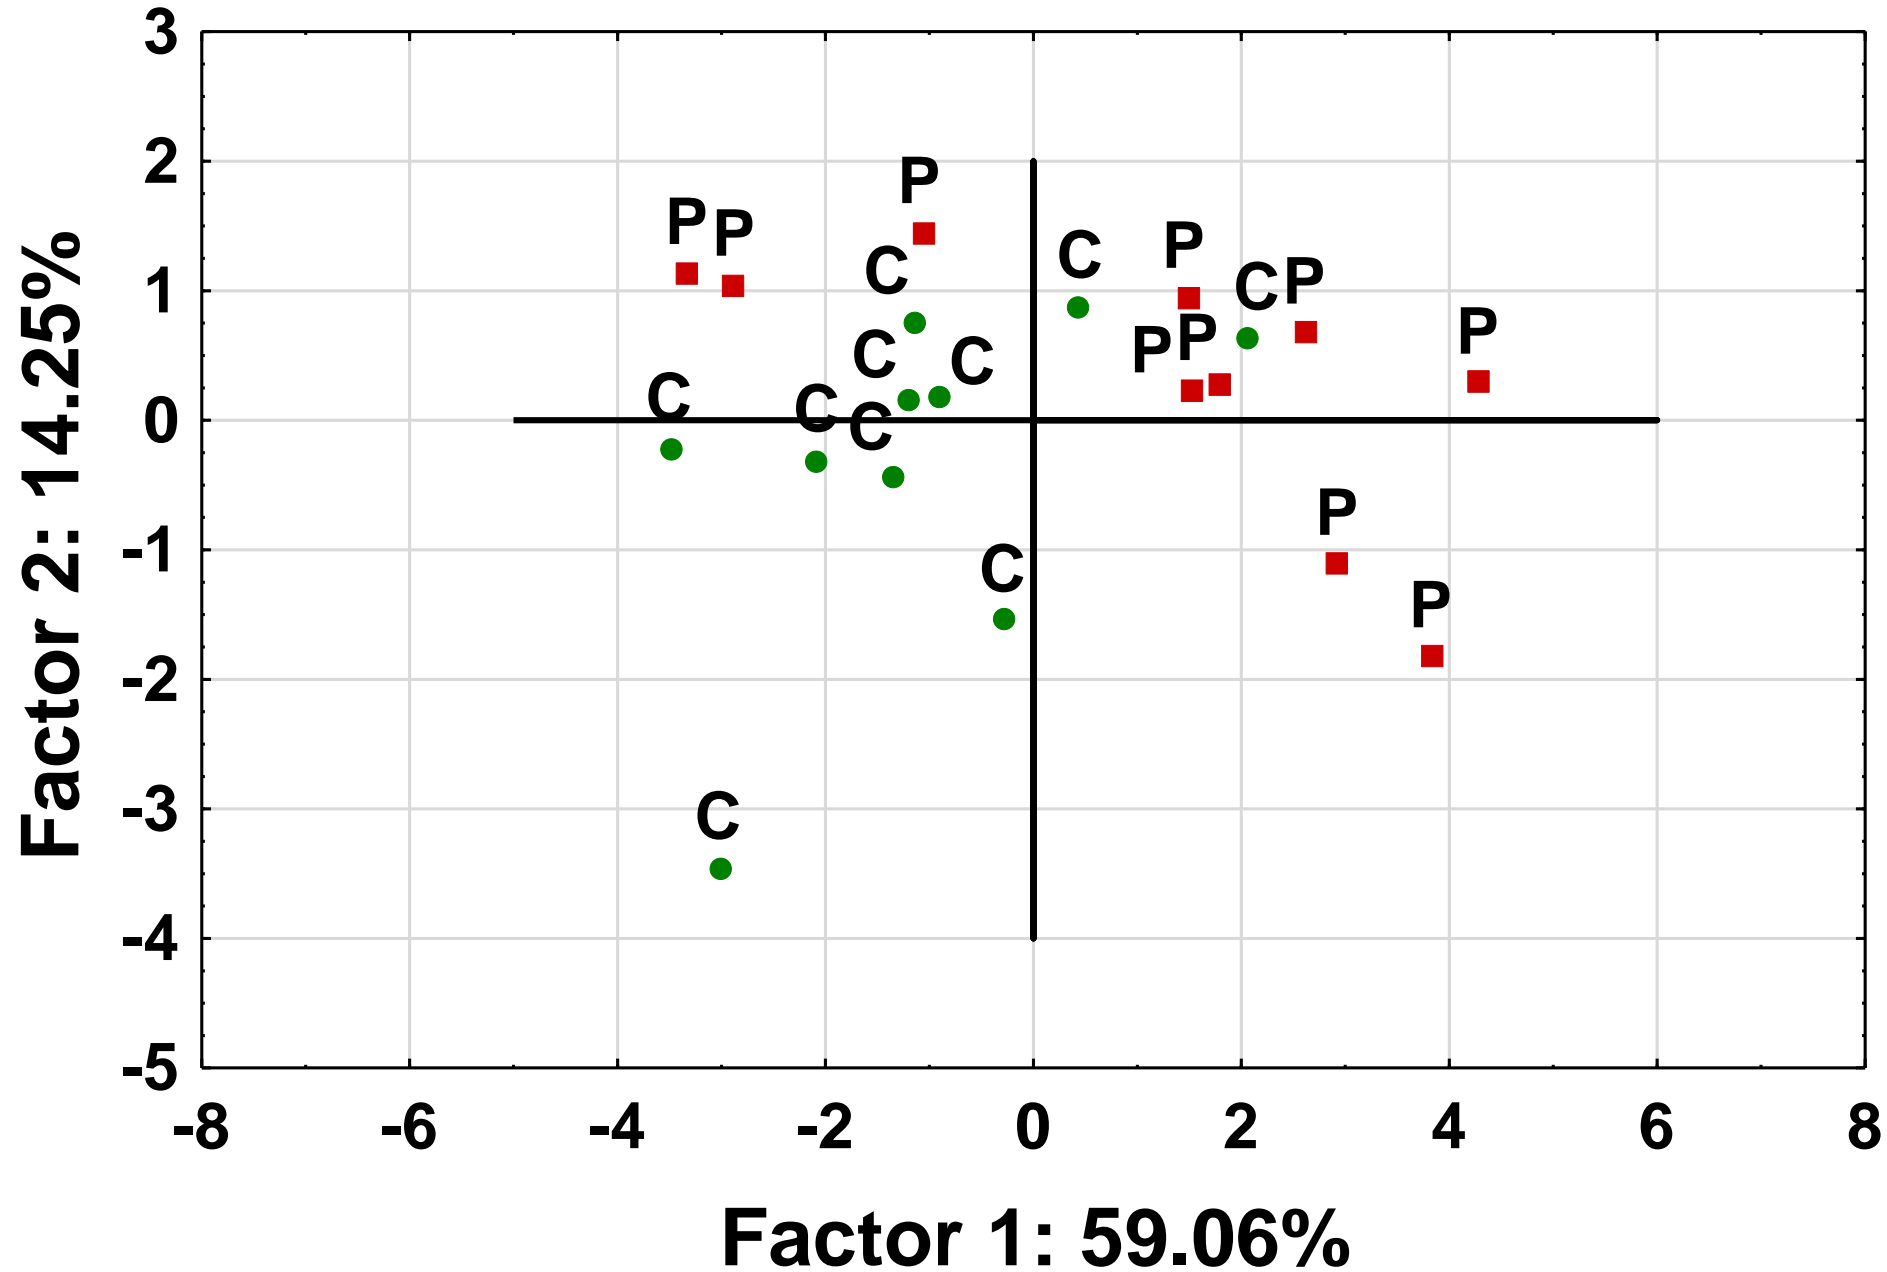

# Cultivating room / Sonata / Prometheus

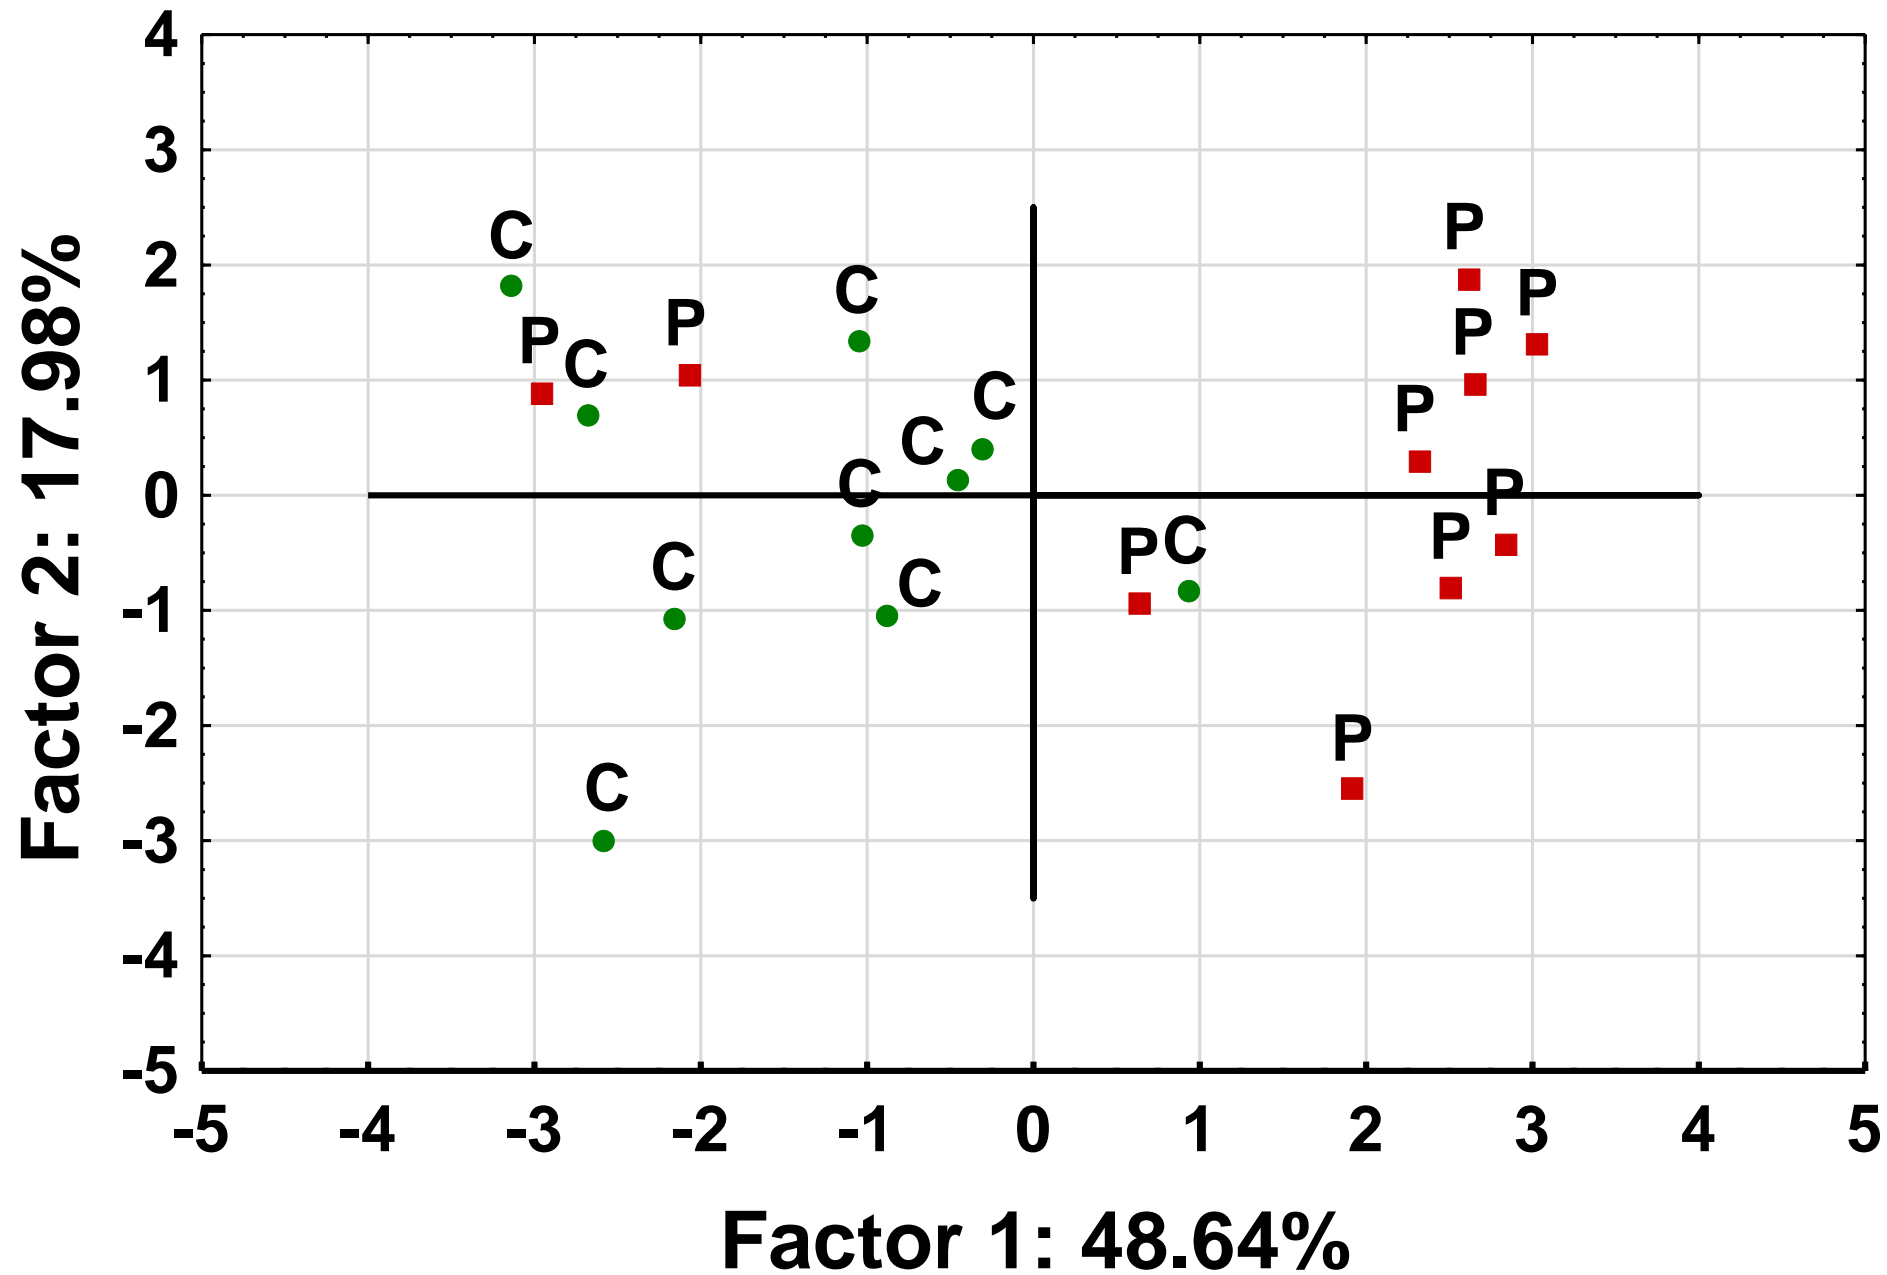

# Cultivating room / Sonata / Xilon

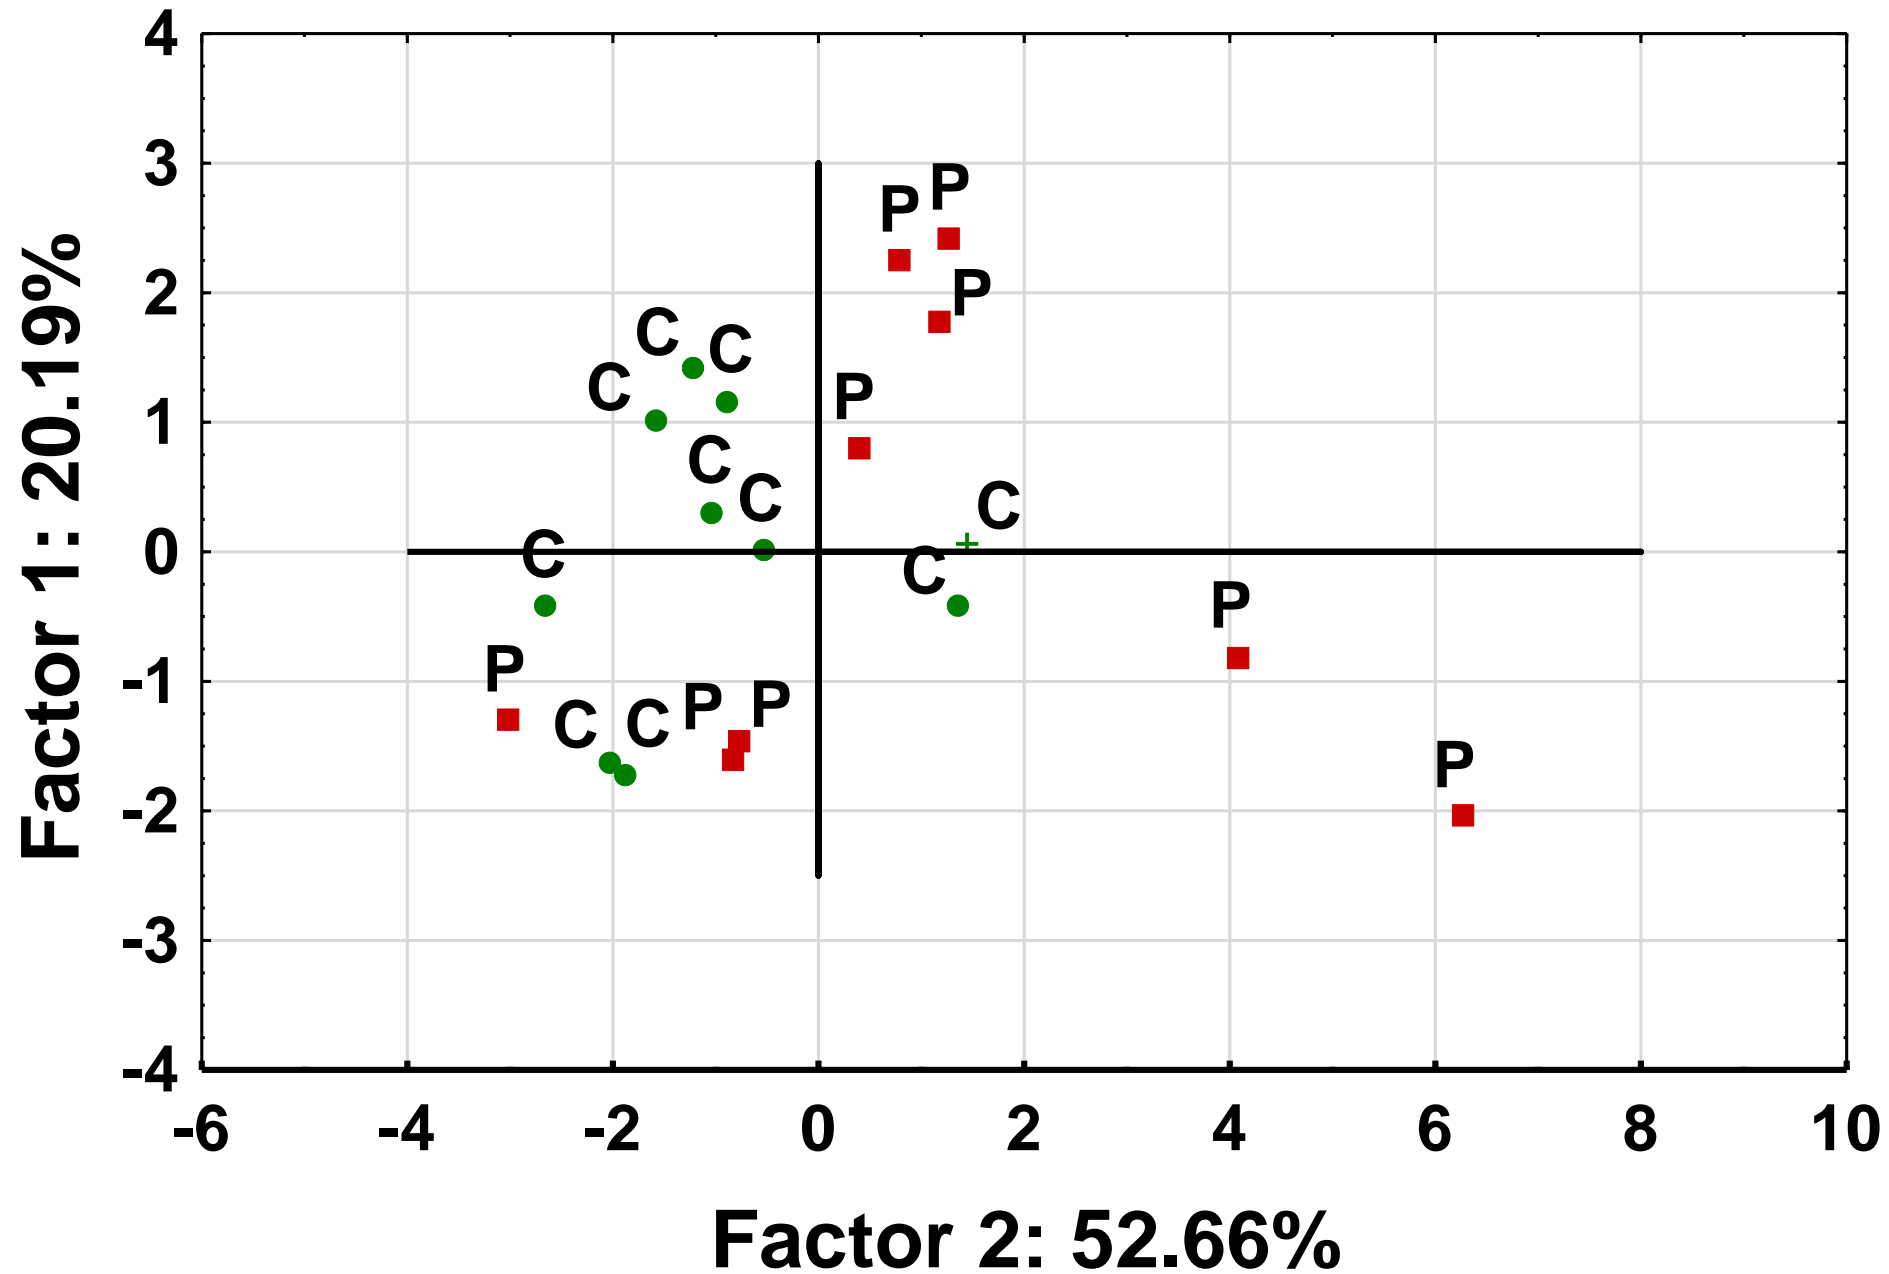

# Cultivating room / Sonata / Pseudomonas sp.

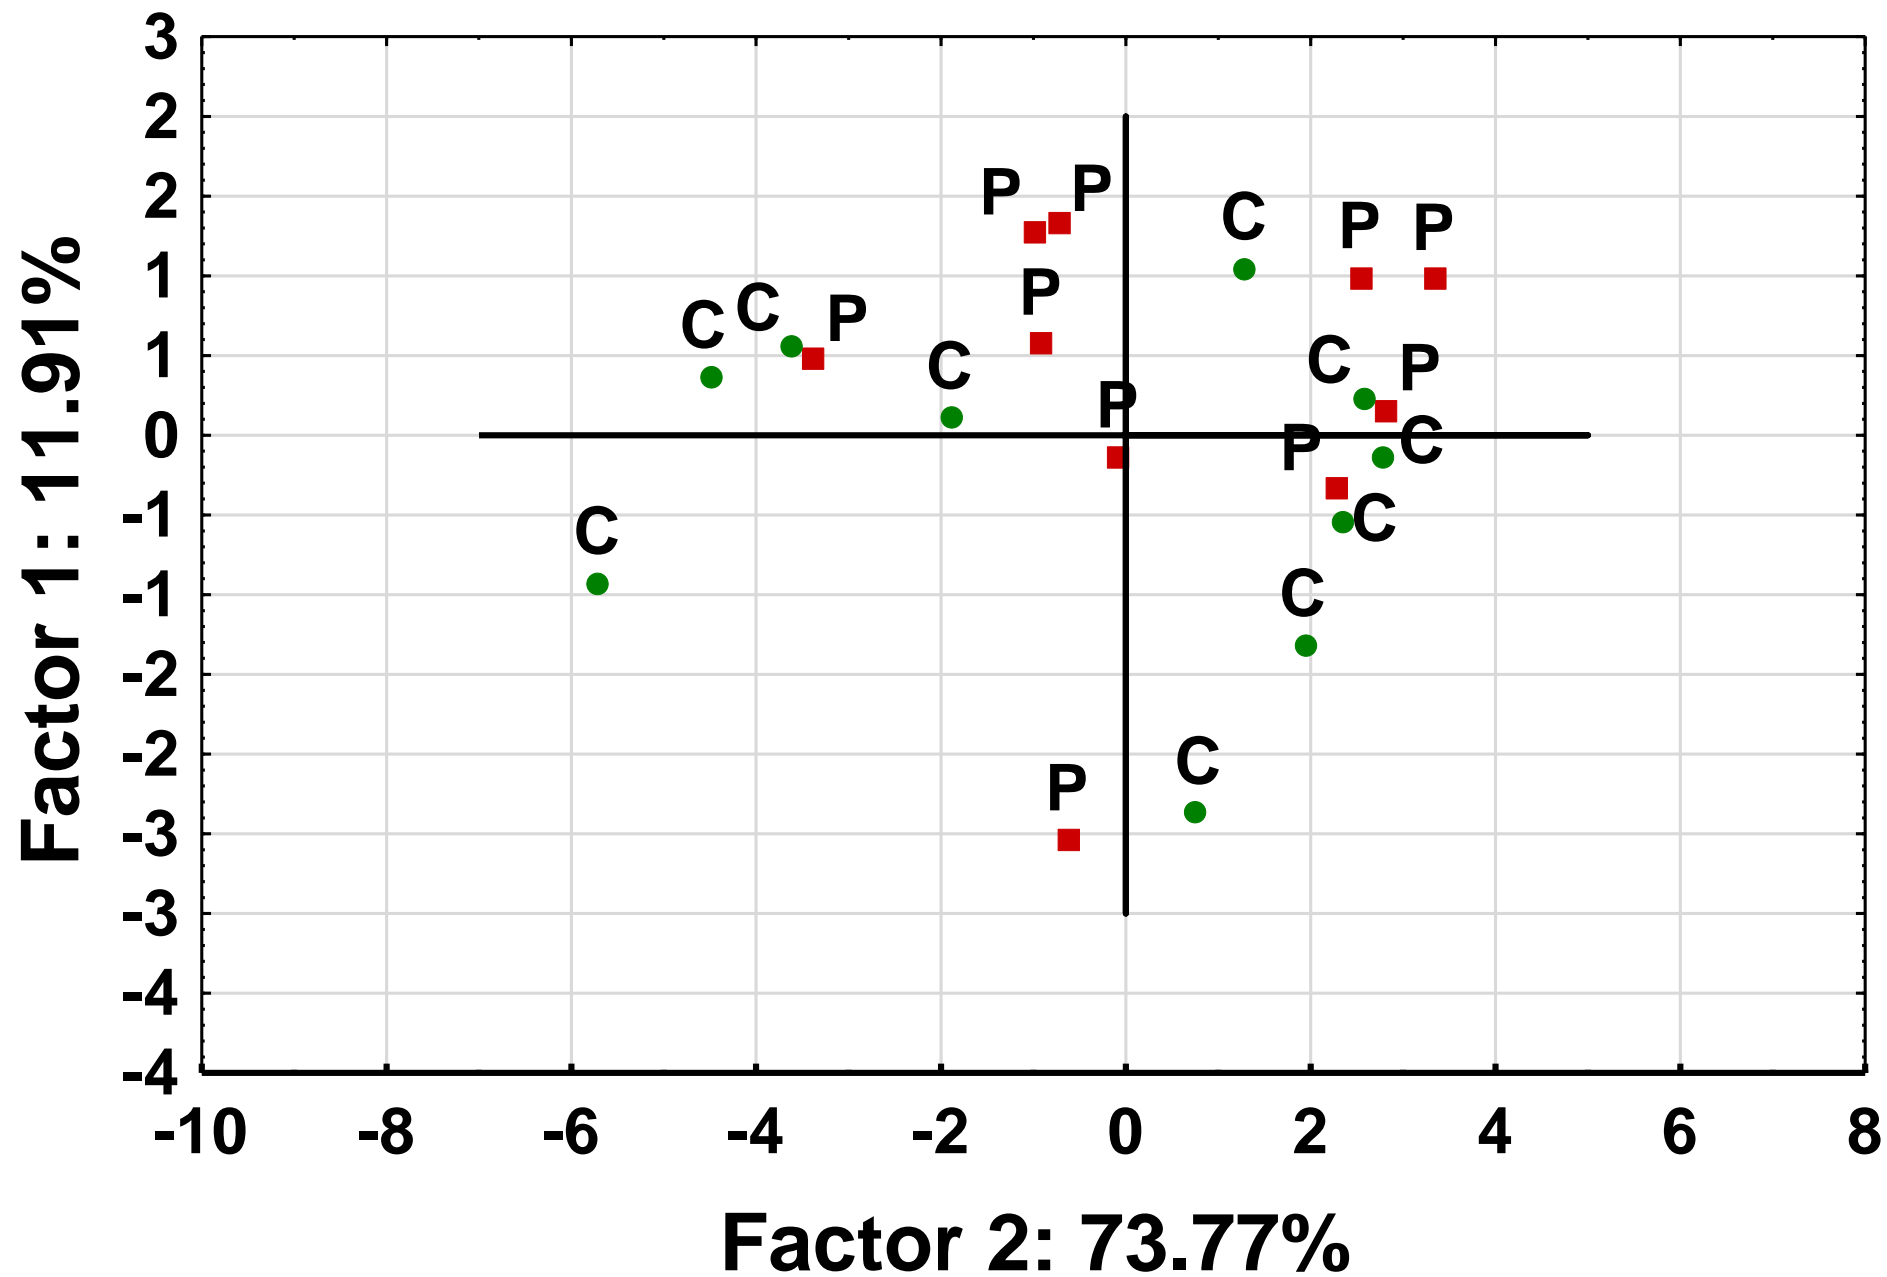

# Cultivating room / Sonata / *Clonostachys rosea* 156

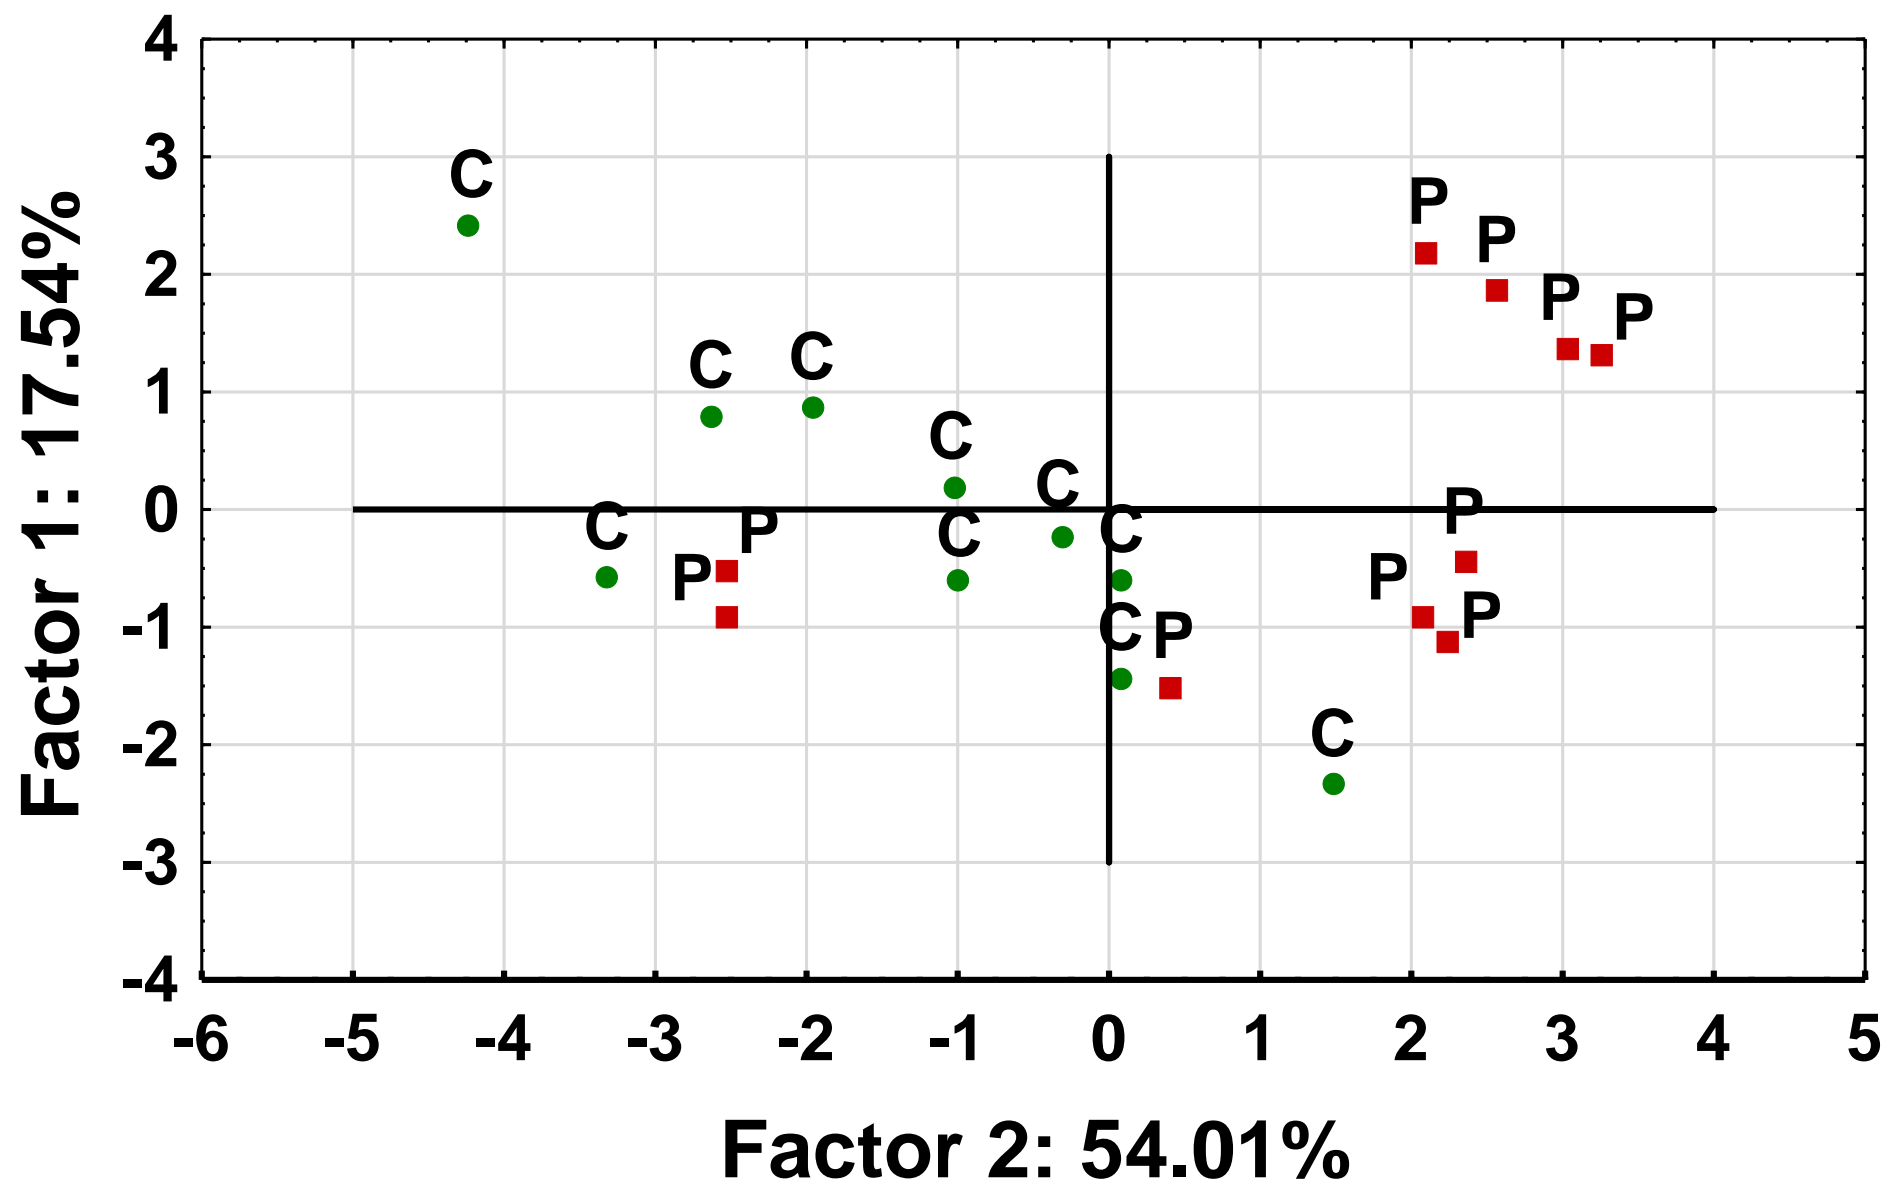

# Cultivating room / Sonata / Control

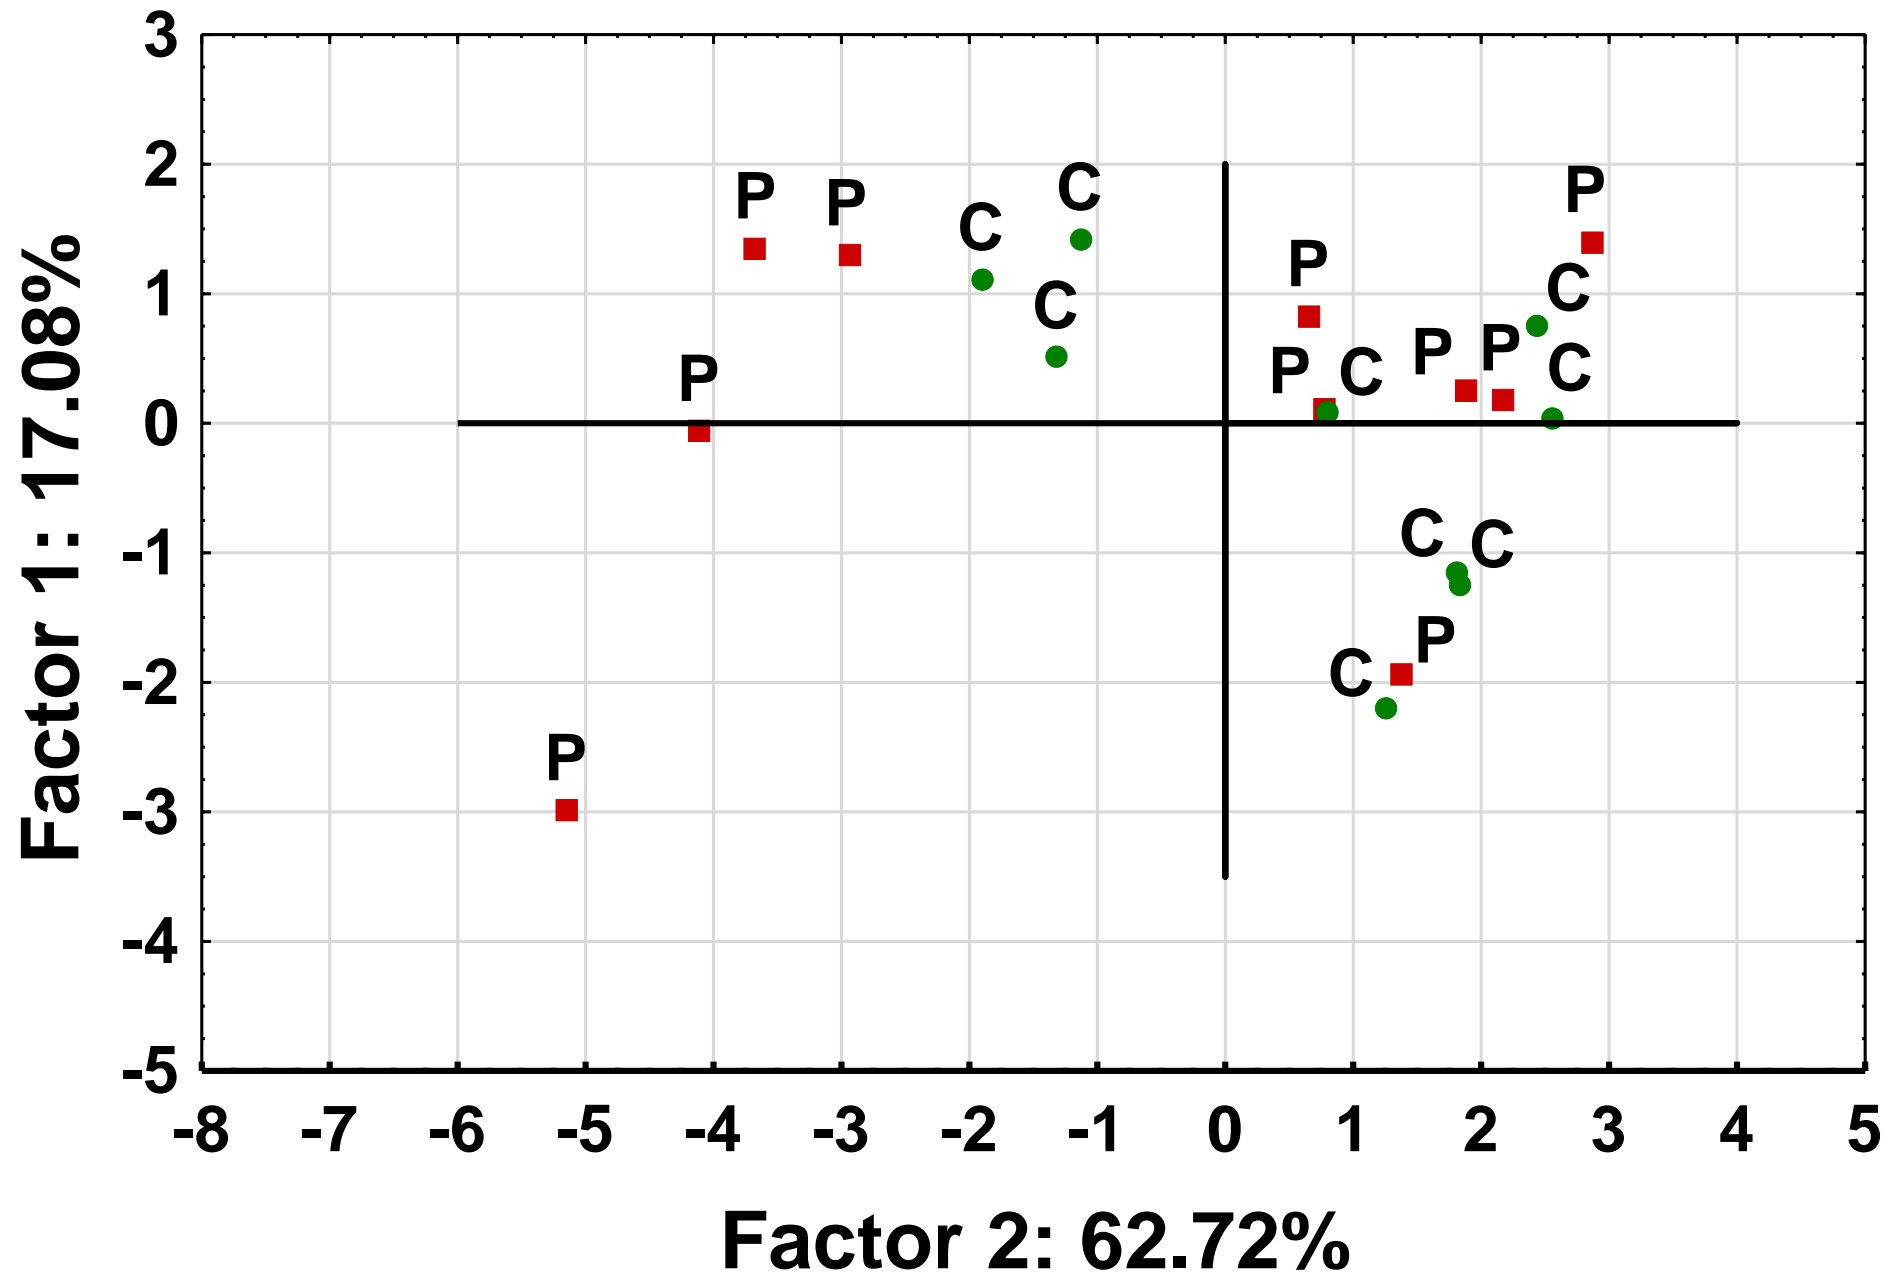

# Cultivating room / Wendy / Aliette

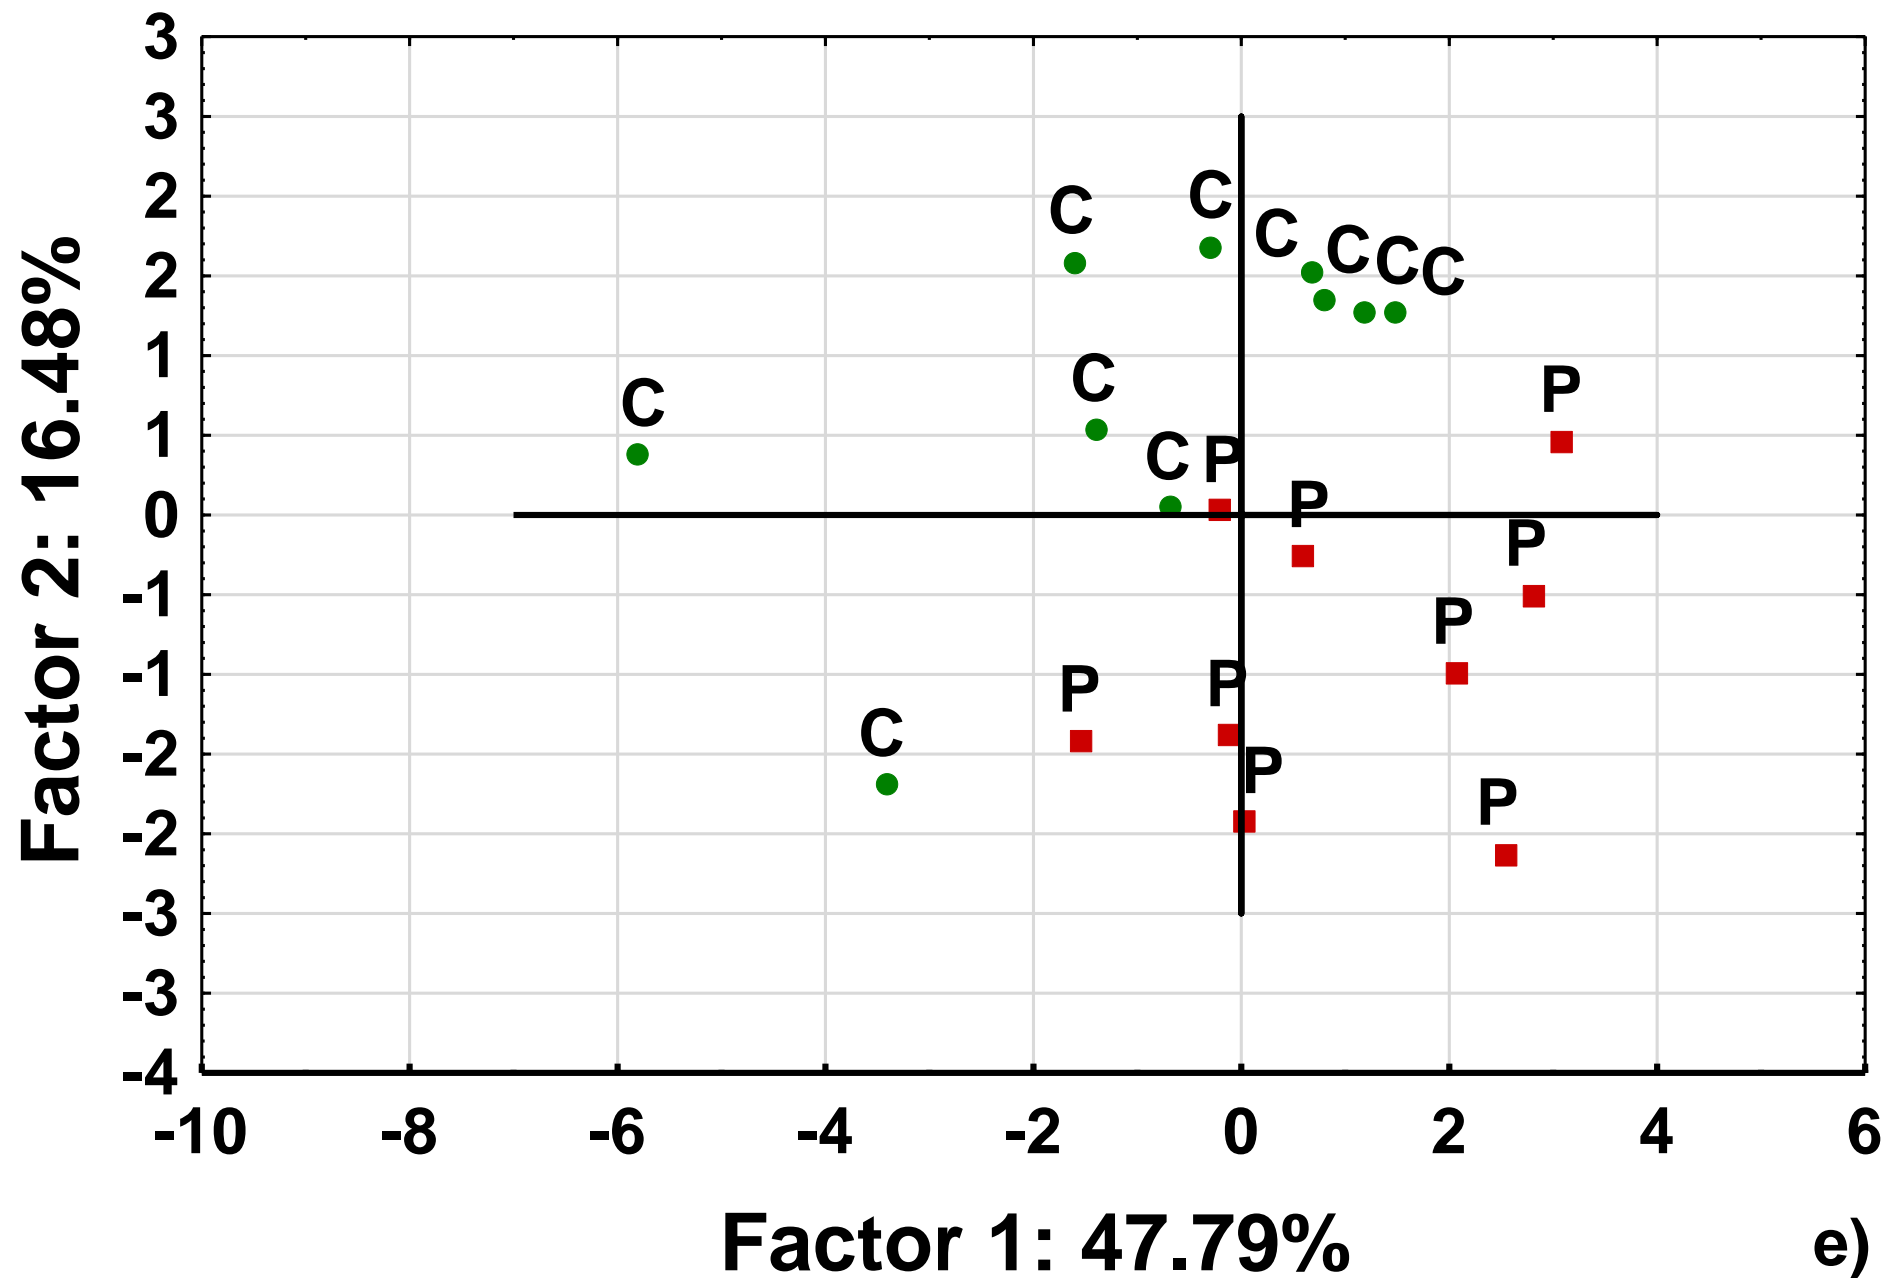

# Cultivating room / Wendy / Clonoplus

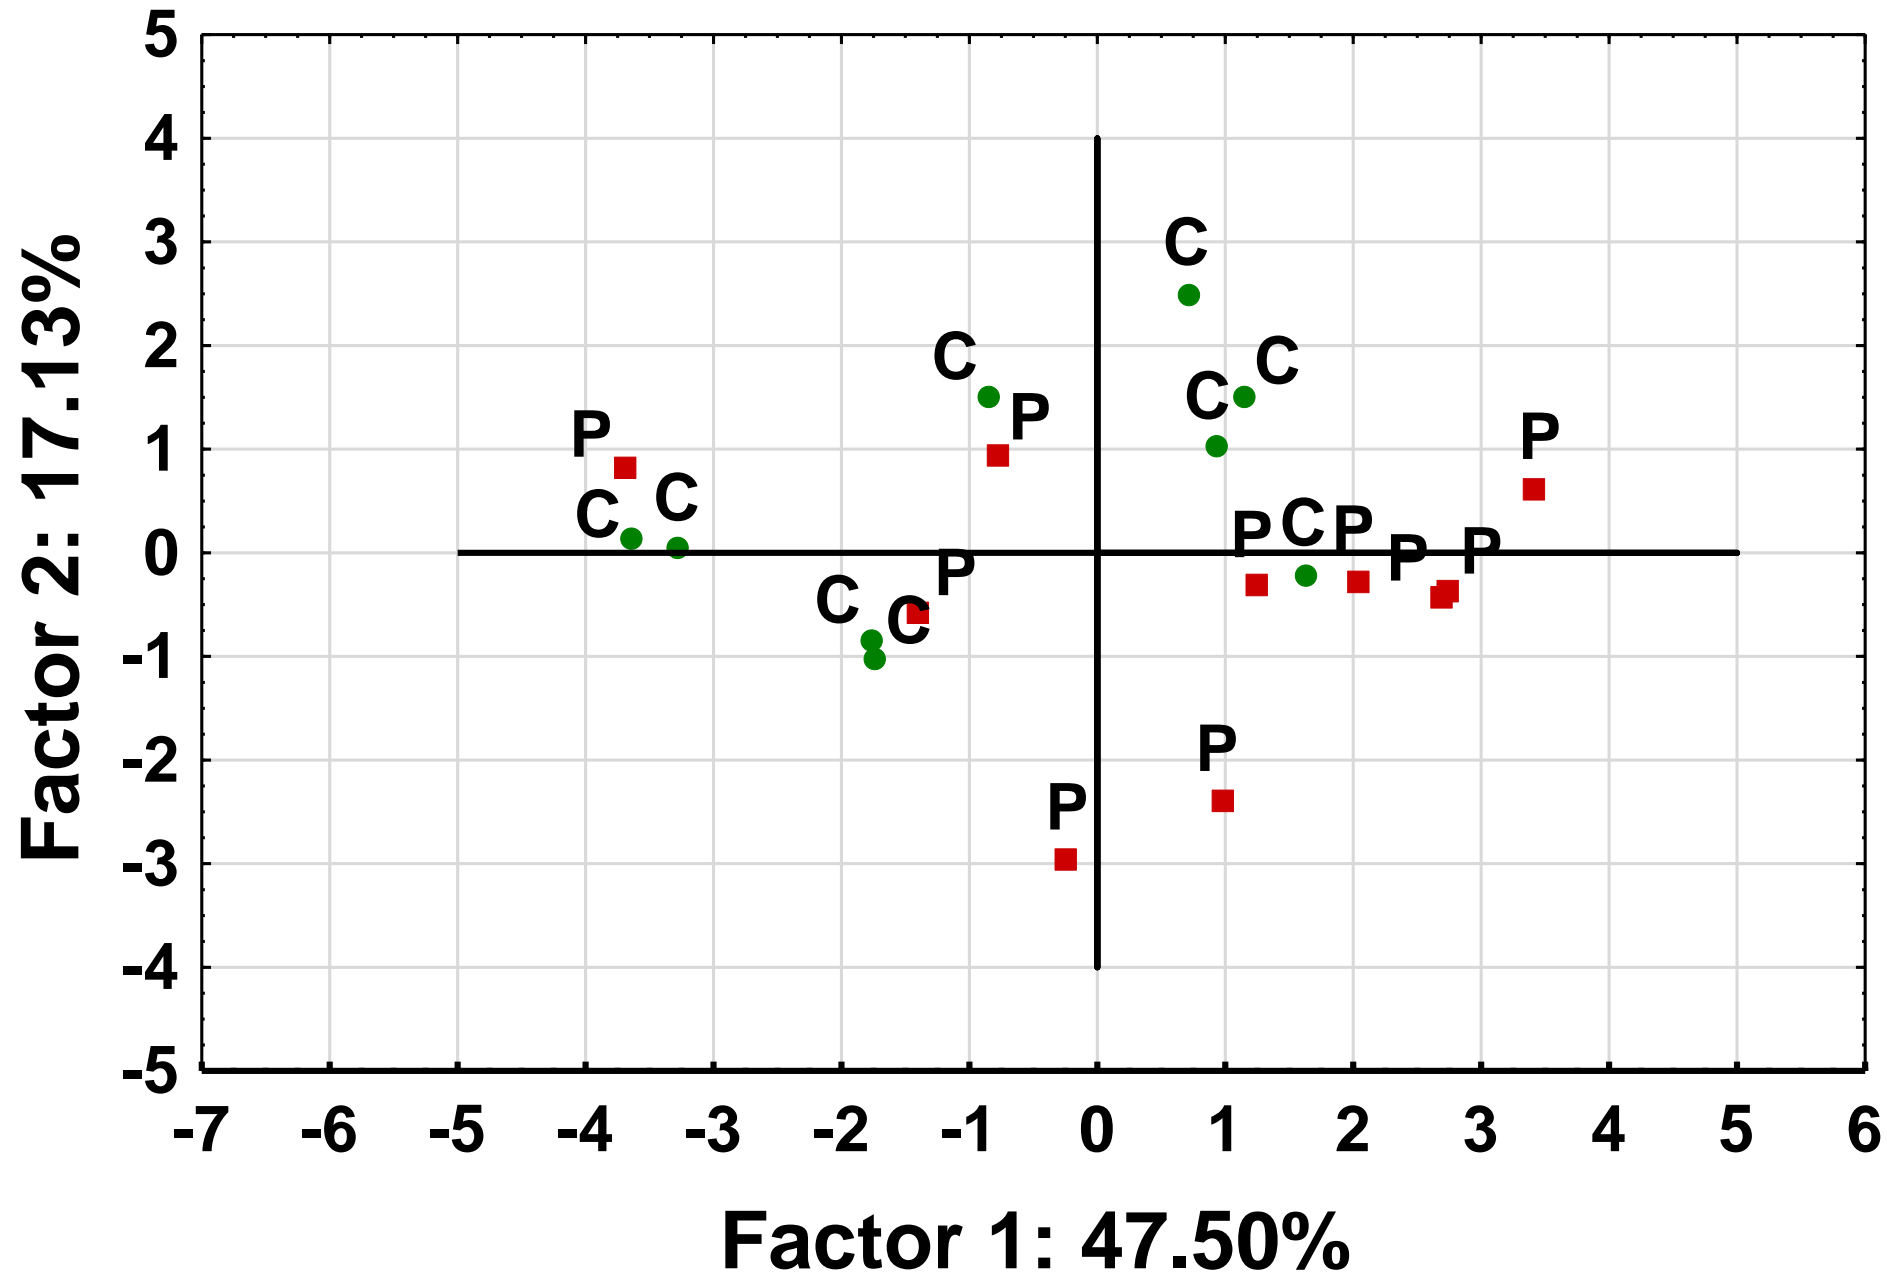

# Cultivating room / Wendy / Contans

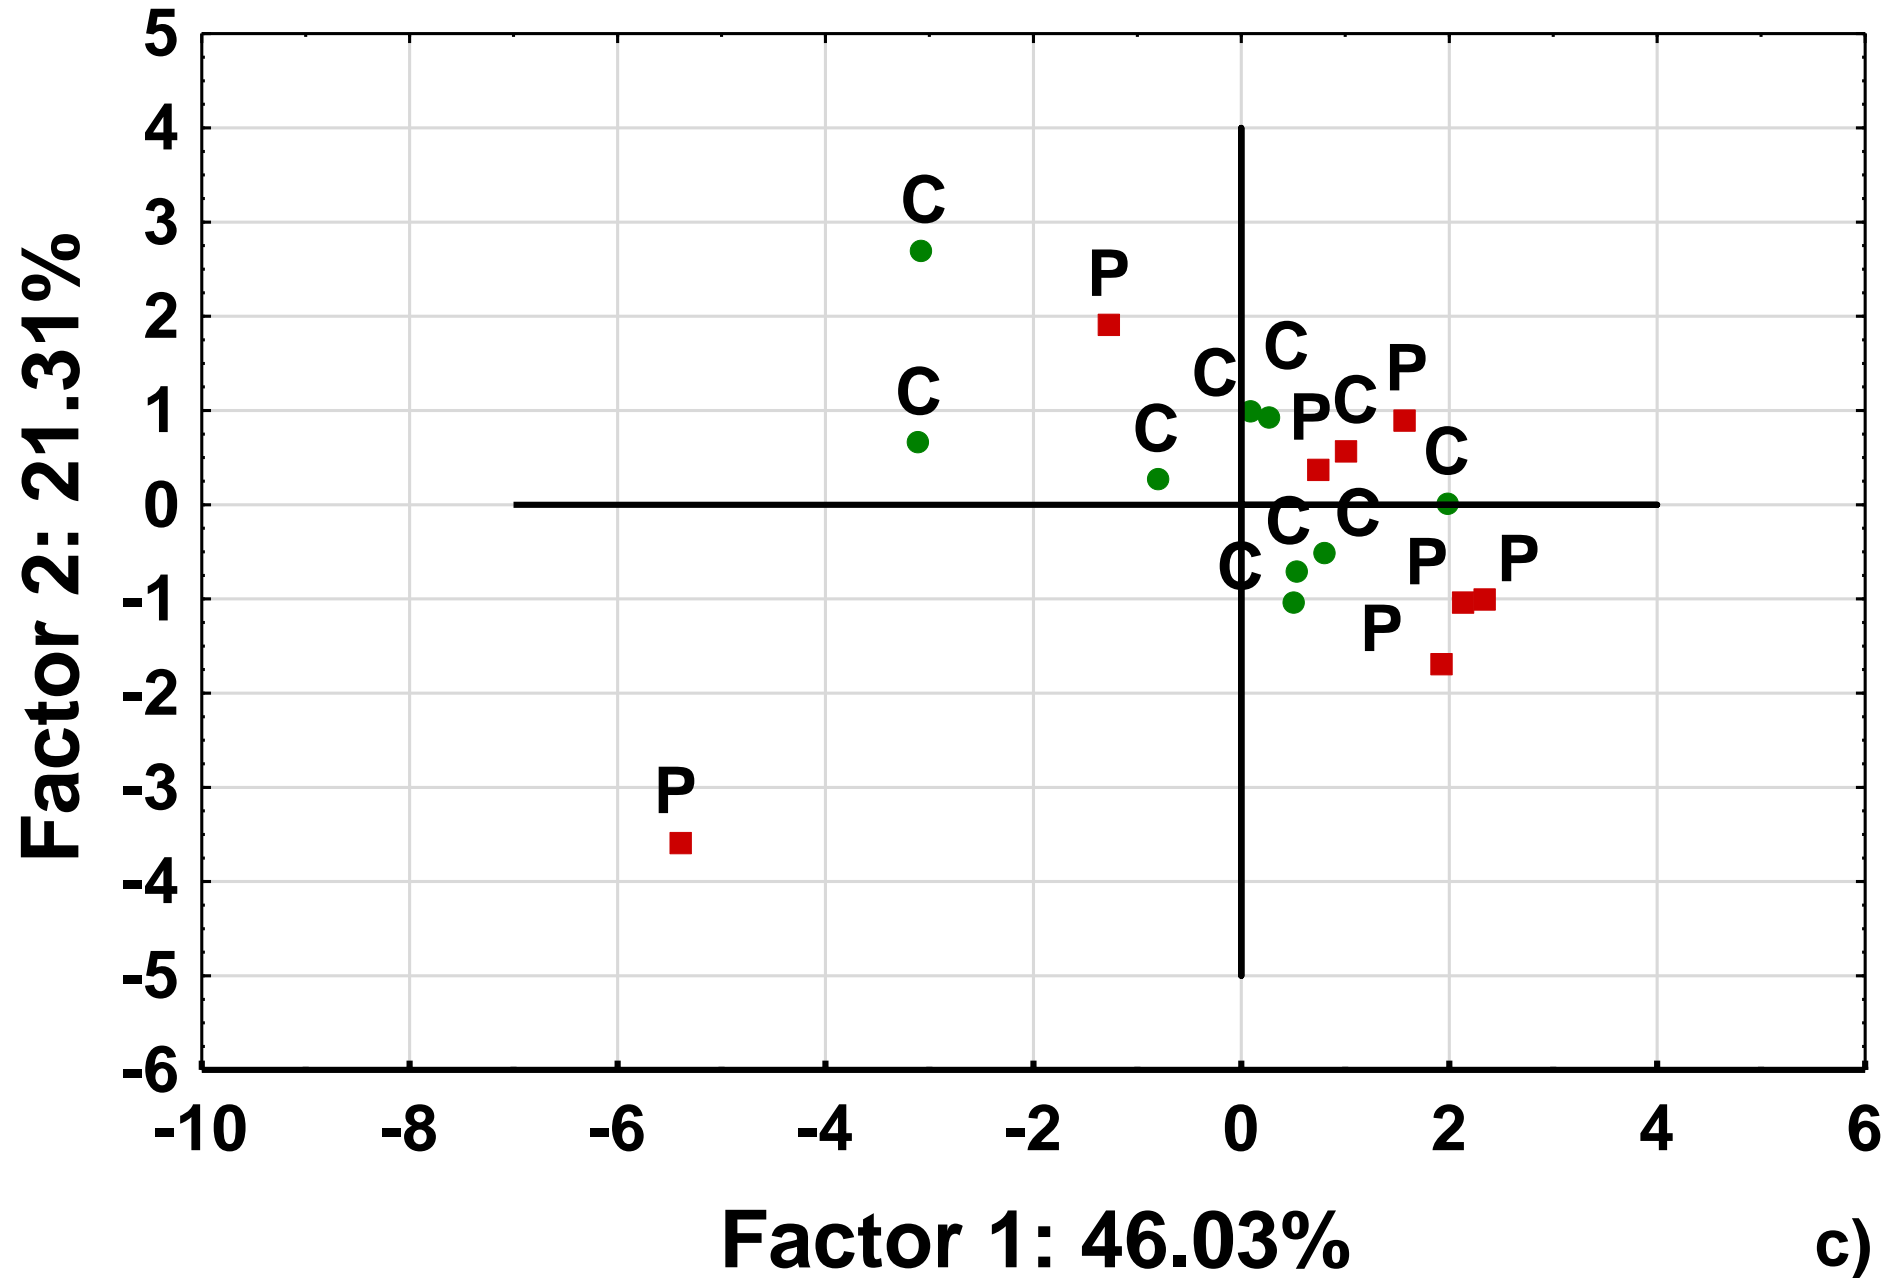

# Cultivating room / Wendy / Gliorex

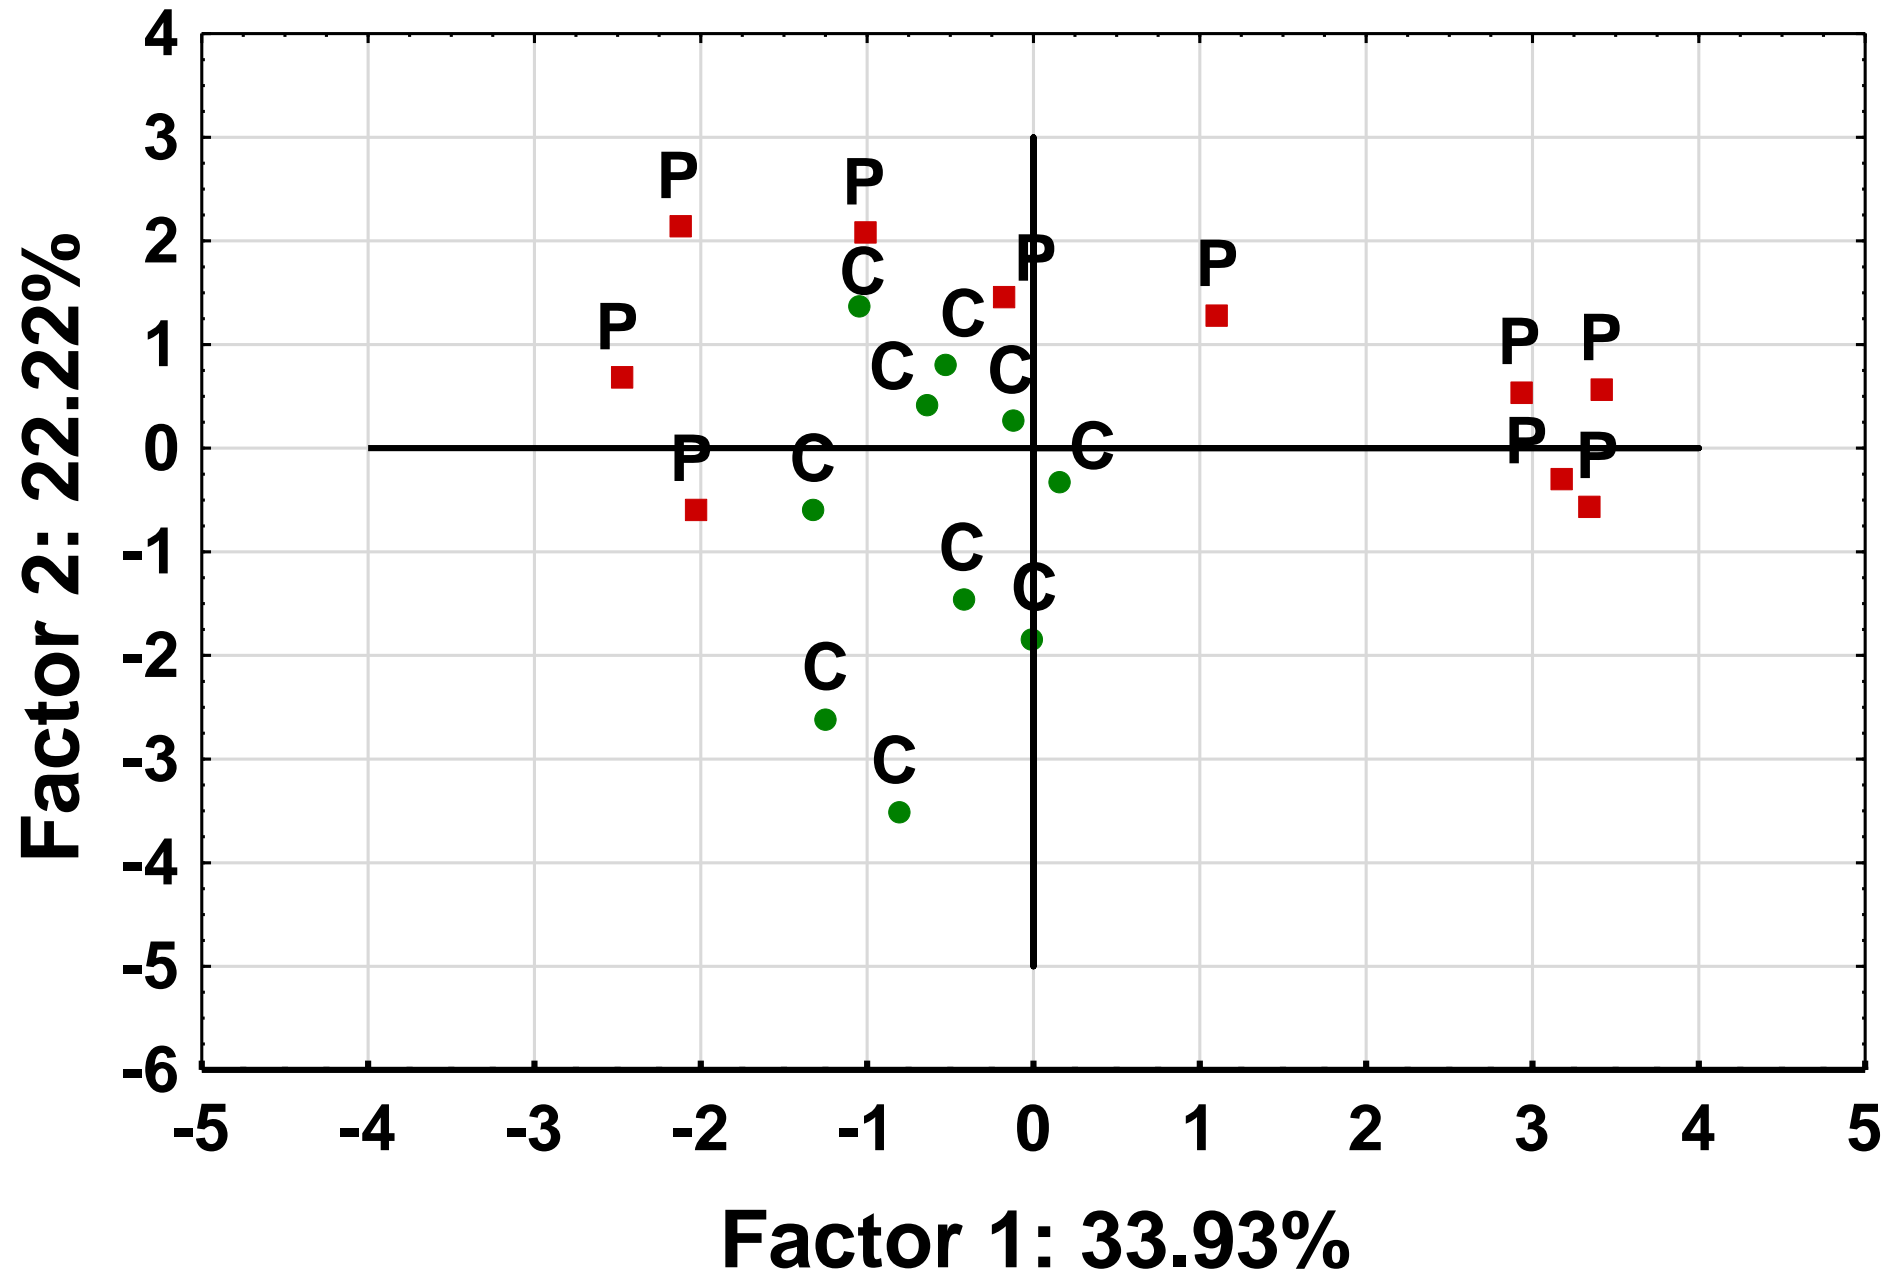

# Cultivating room / Wendy / Hirundo

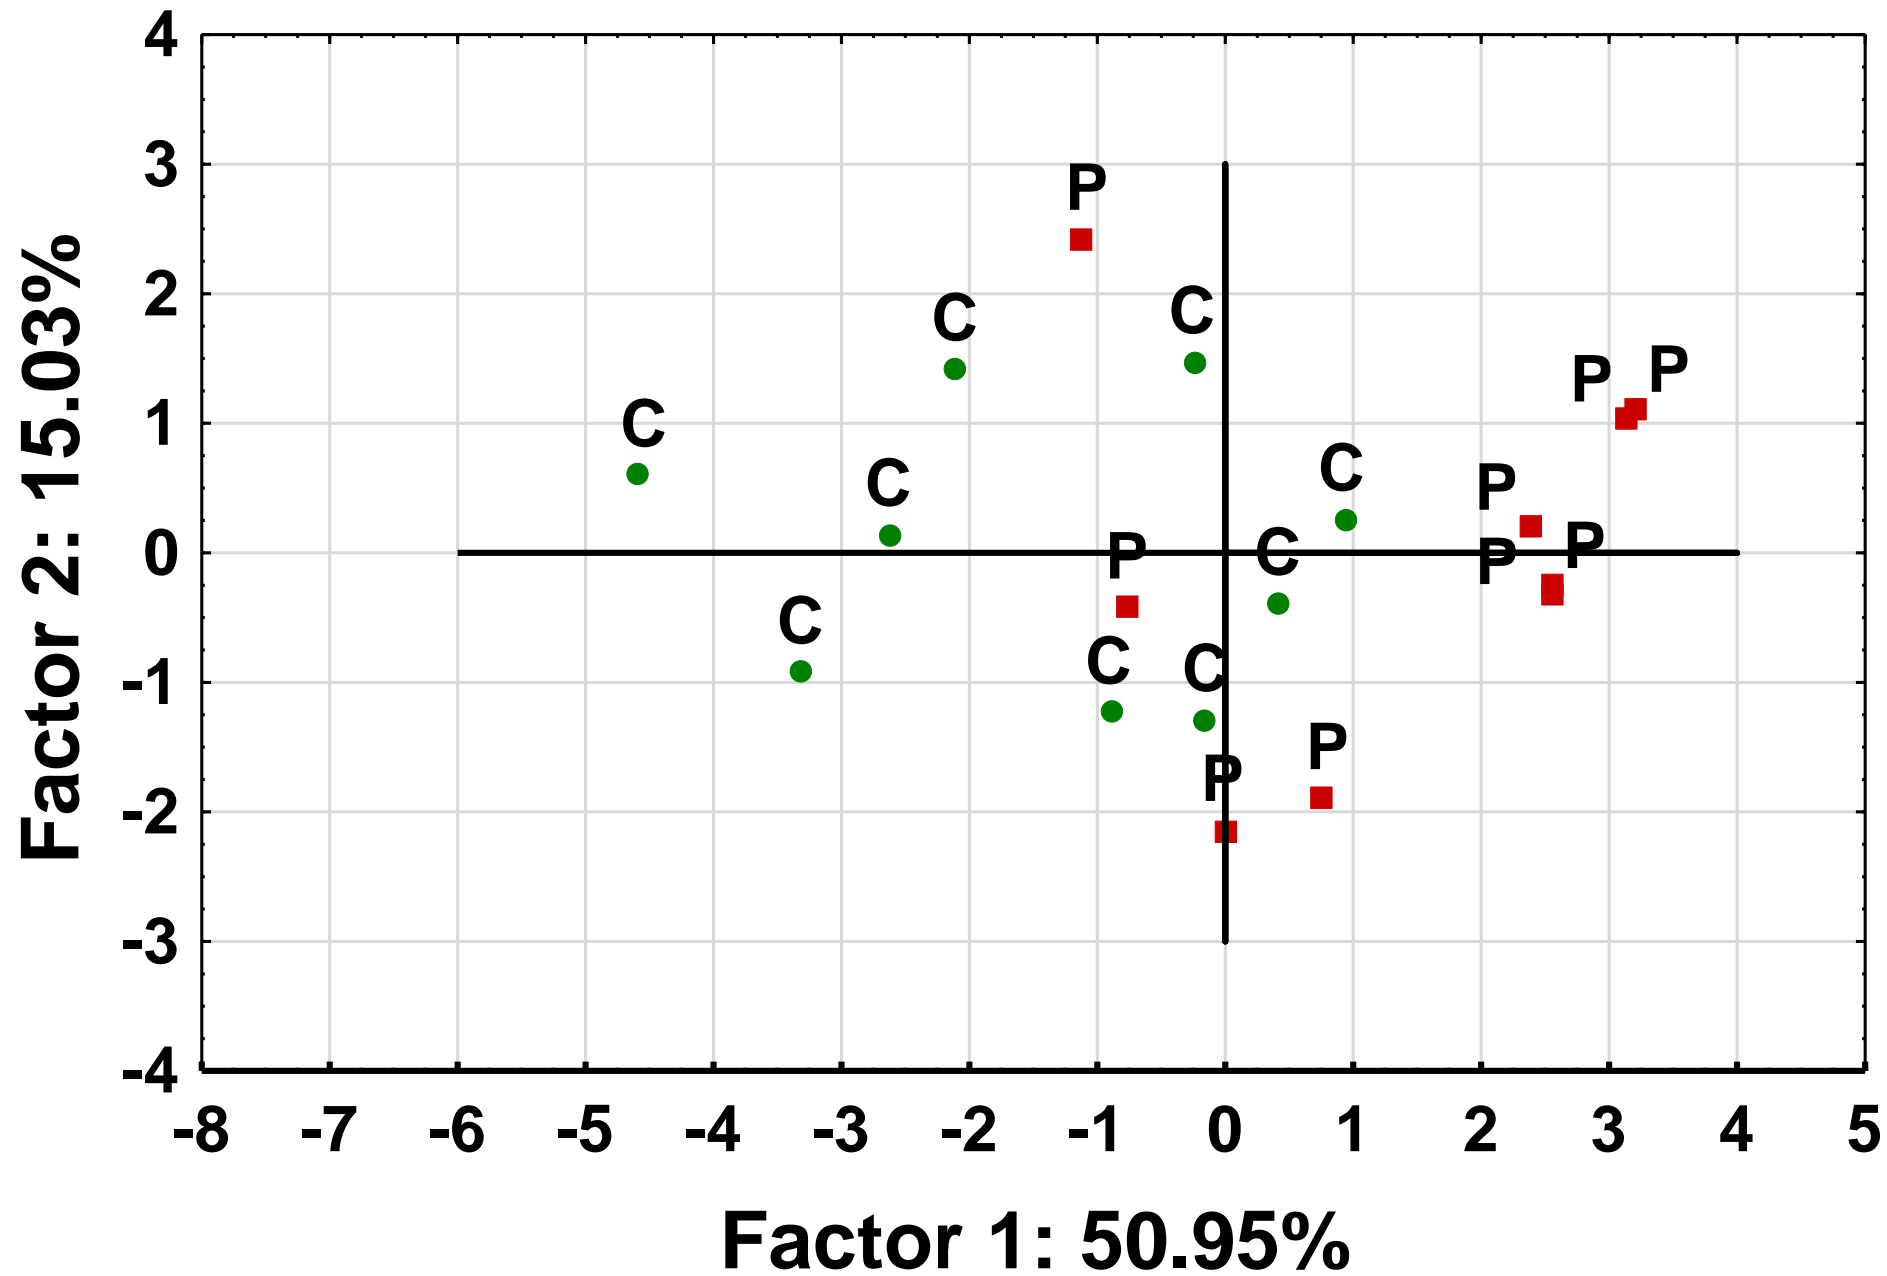

# Cultivating room / Wendy / Integral Pro

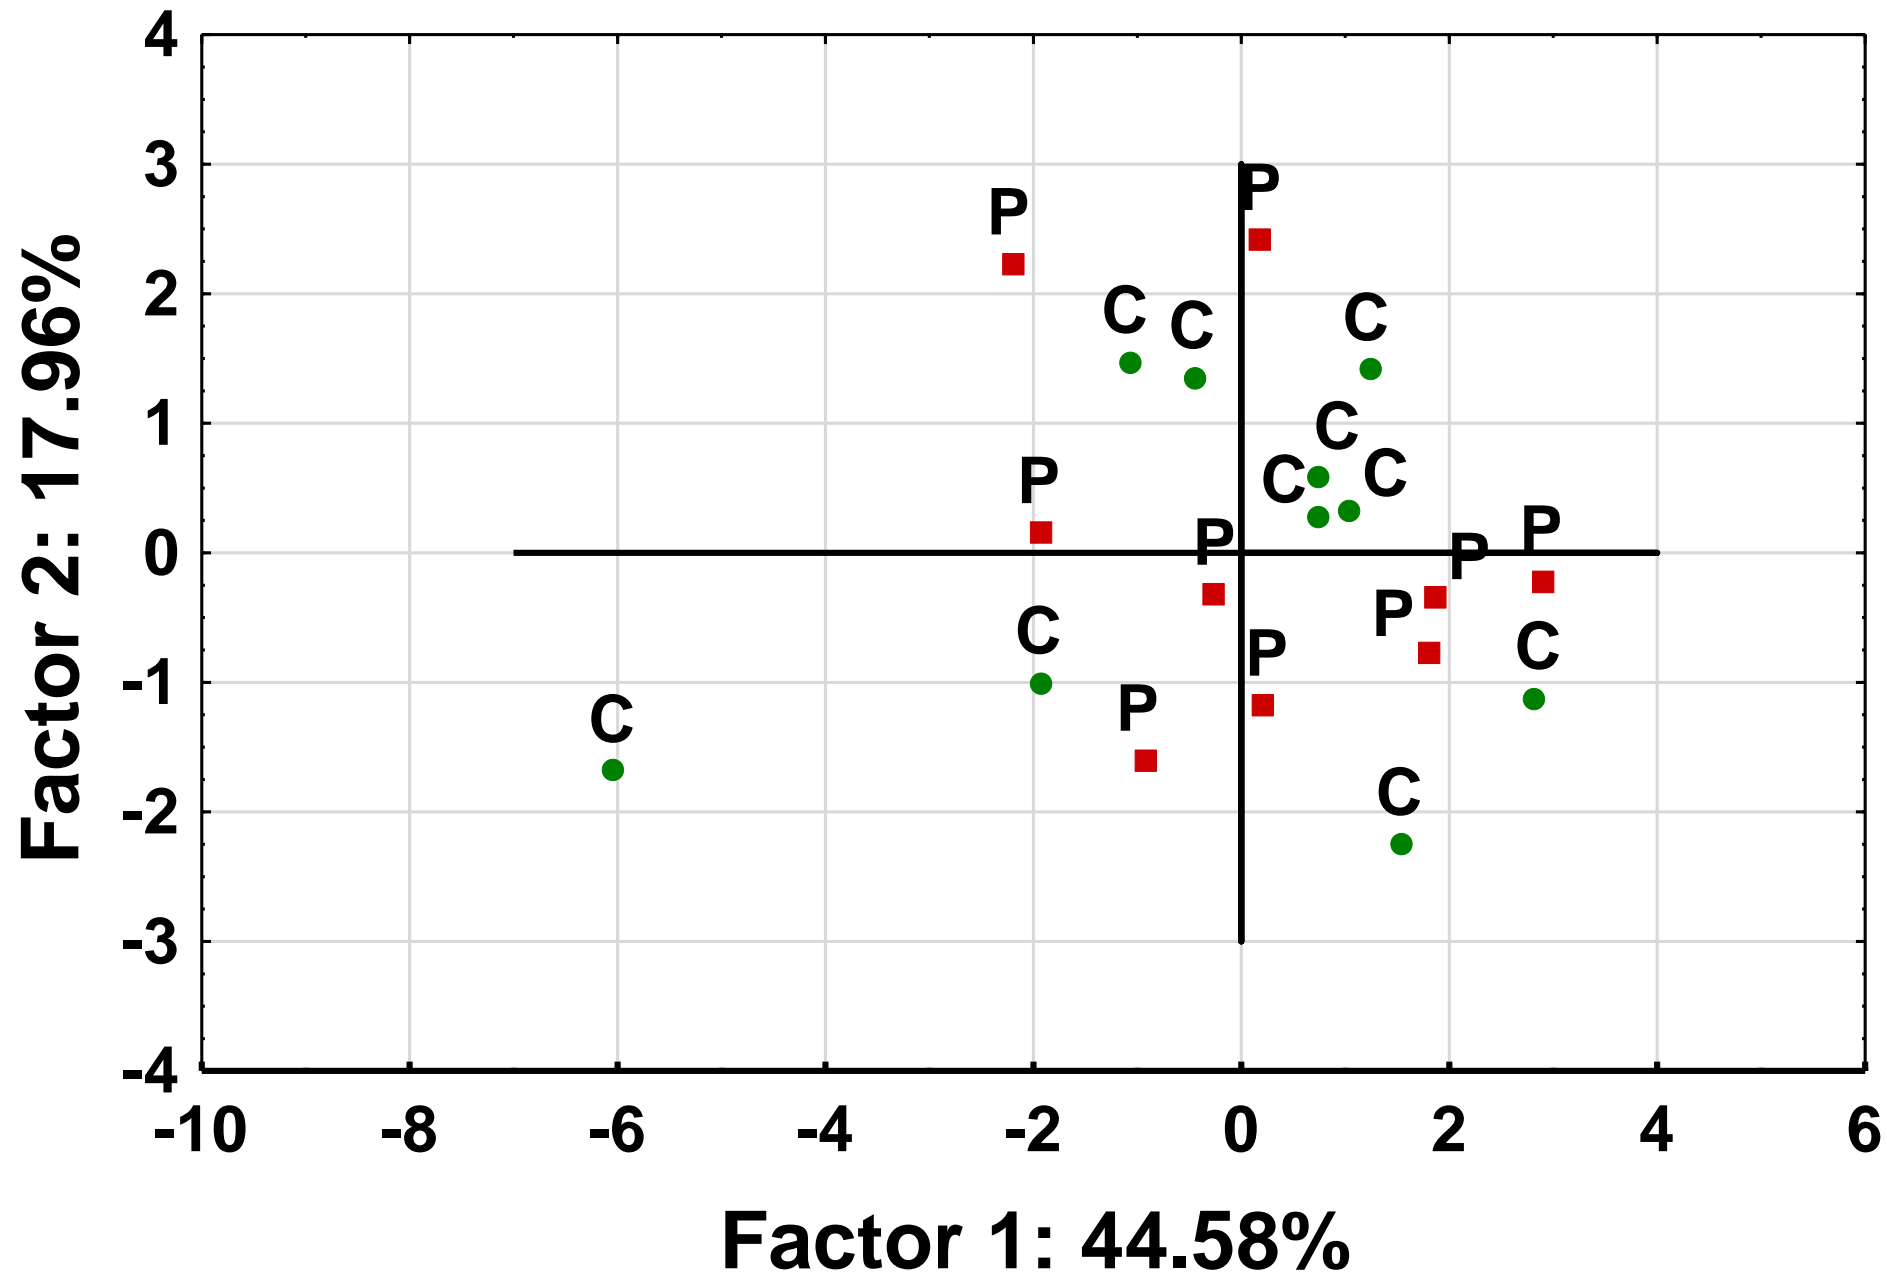

# Cultivating room / Wendy / Prometheus

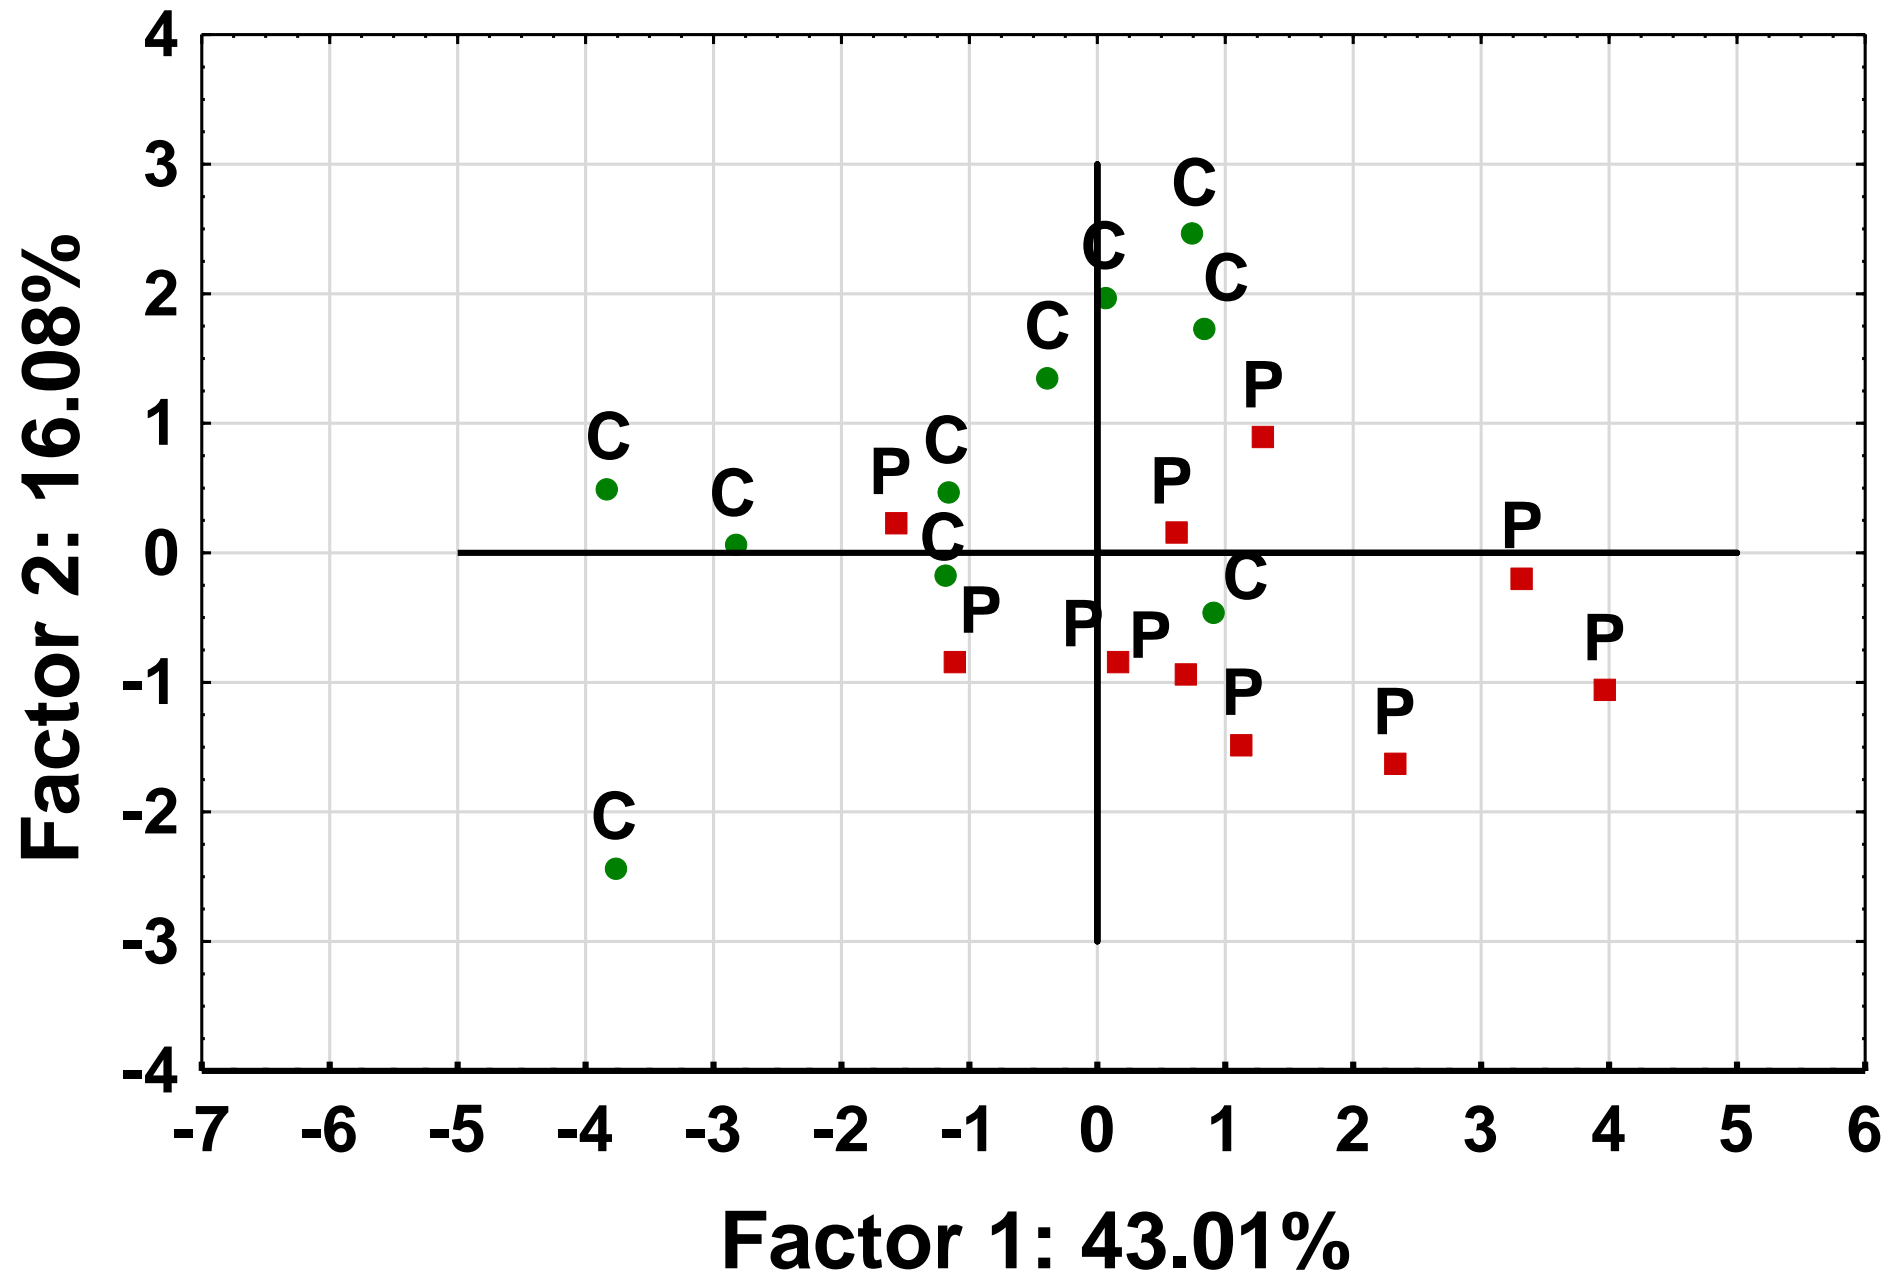

# Cultivating room / Wendy / Pseudomonas sp.

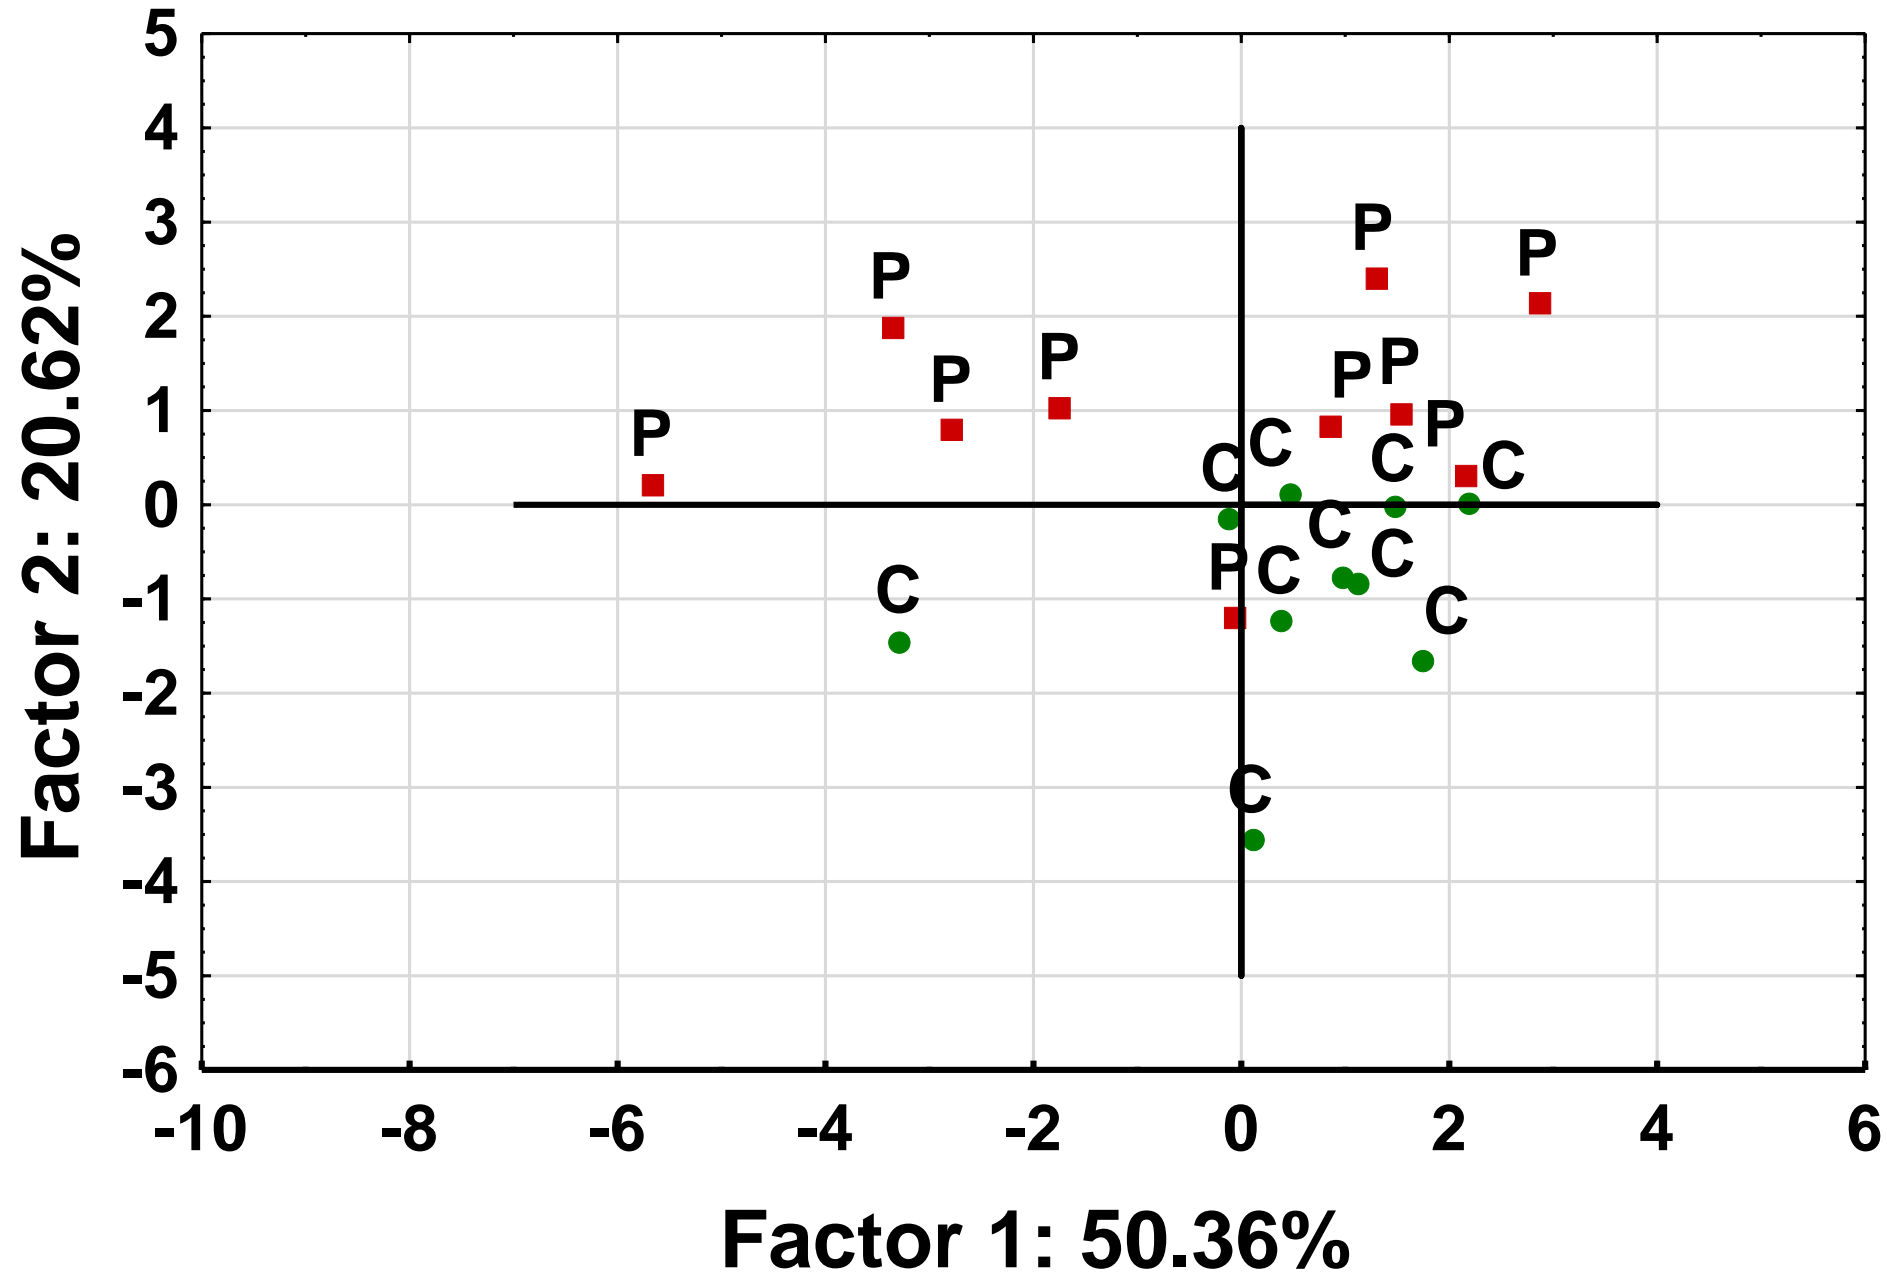

# Cultivating room / Wendy / *Clonostachys rosea* 156

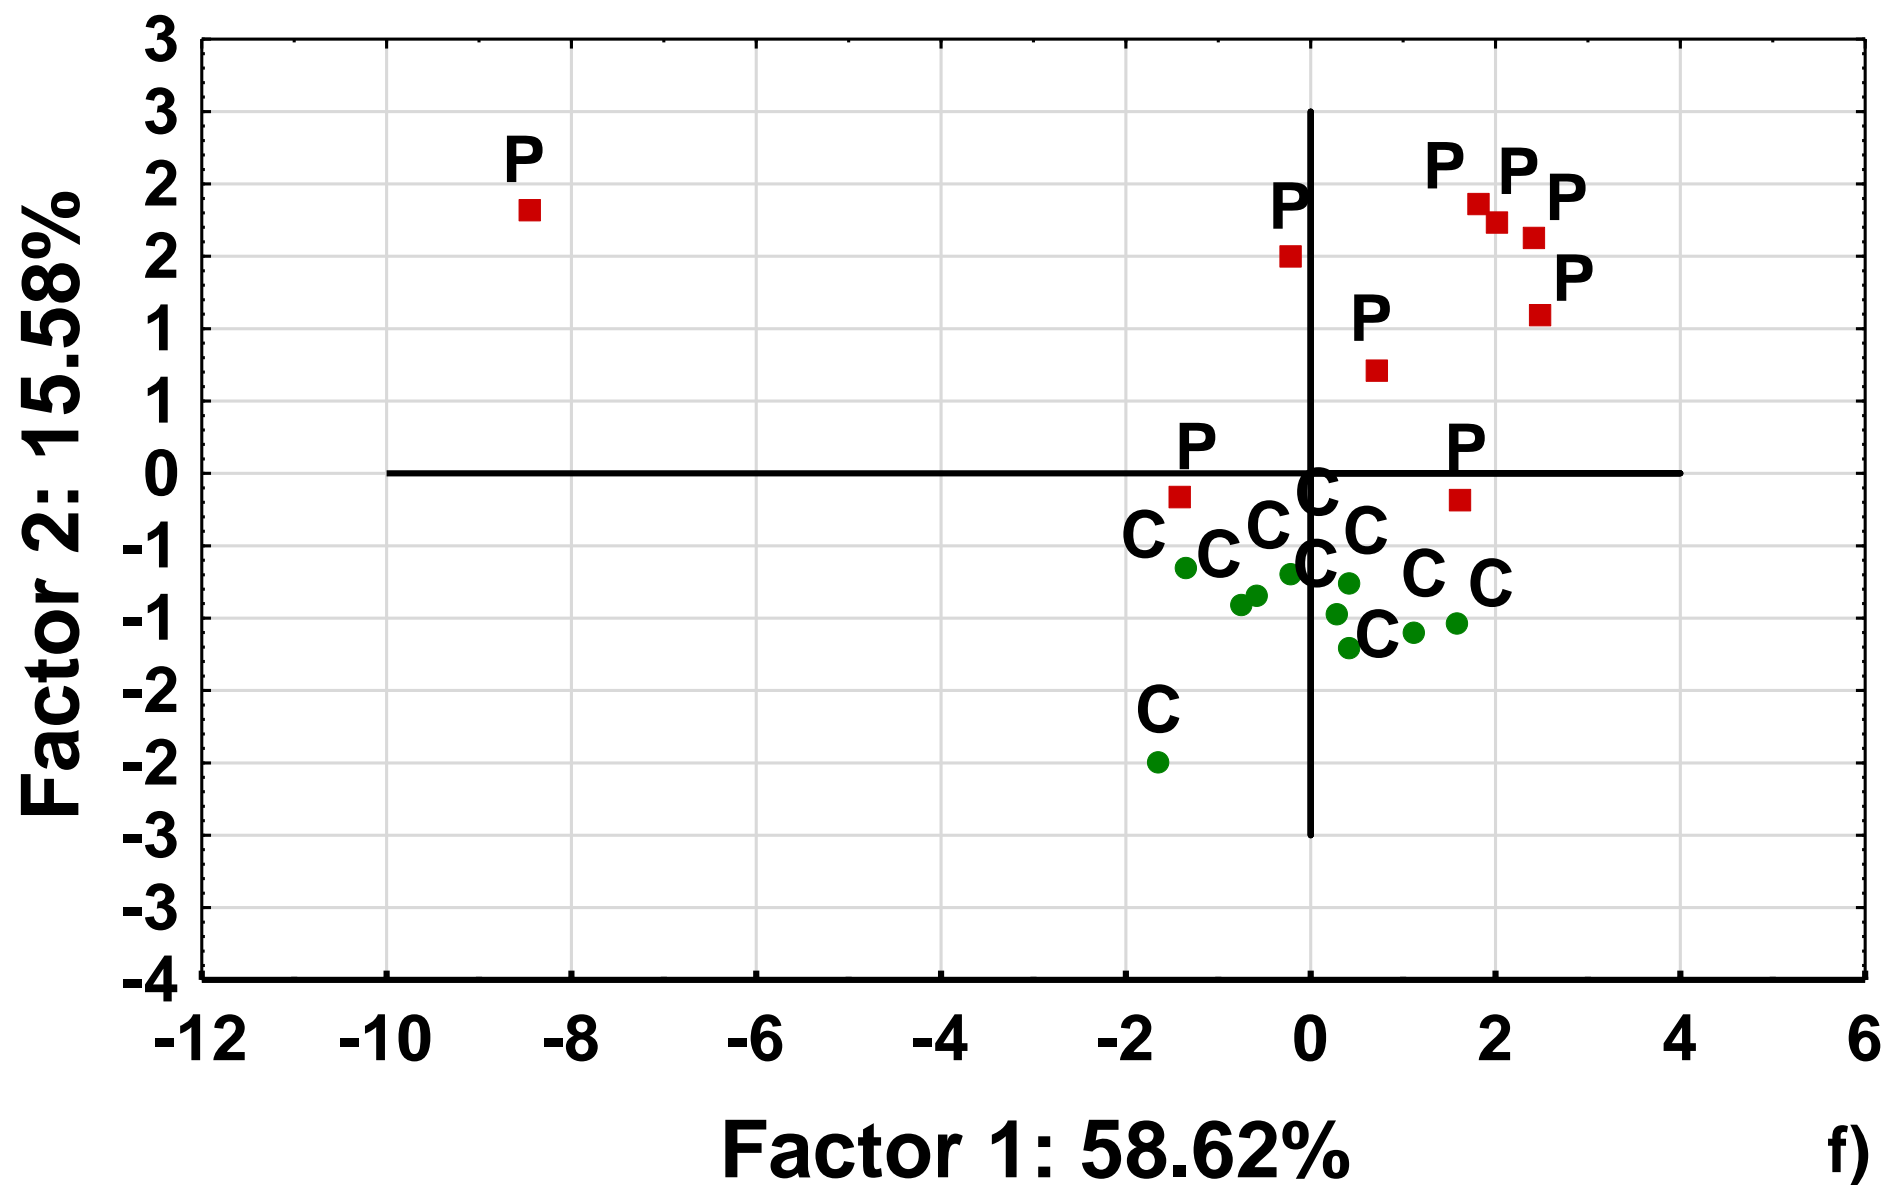

# Cultivating room / Wendy / Xilon

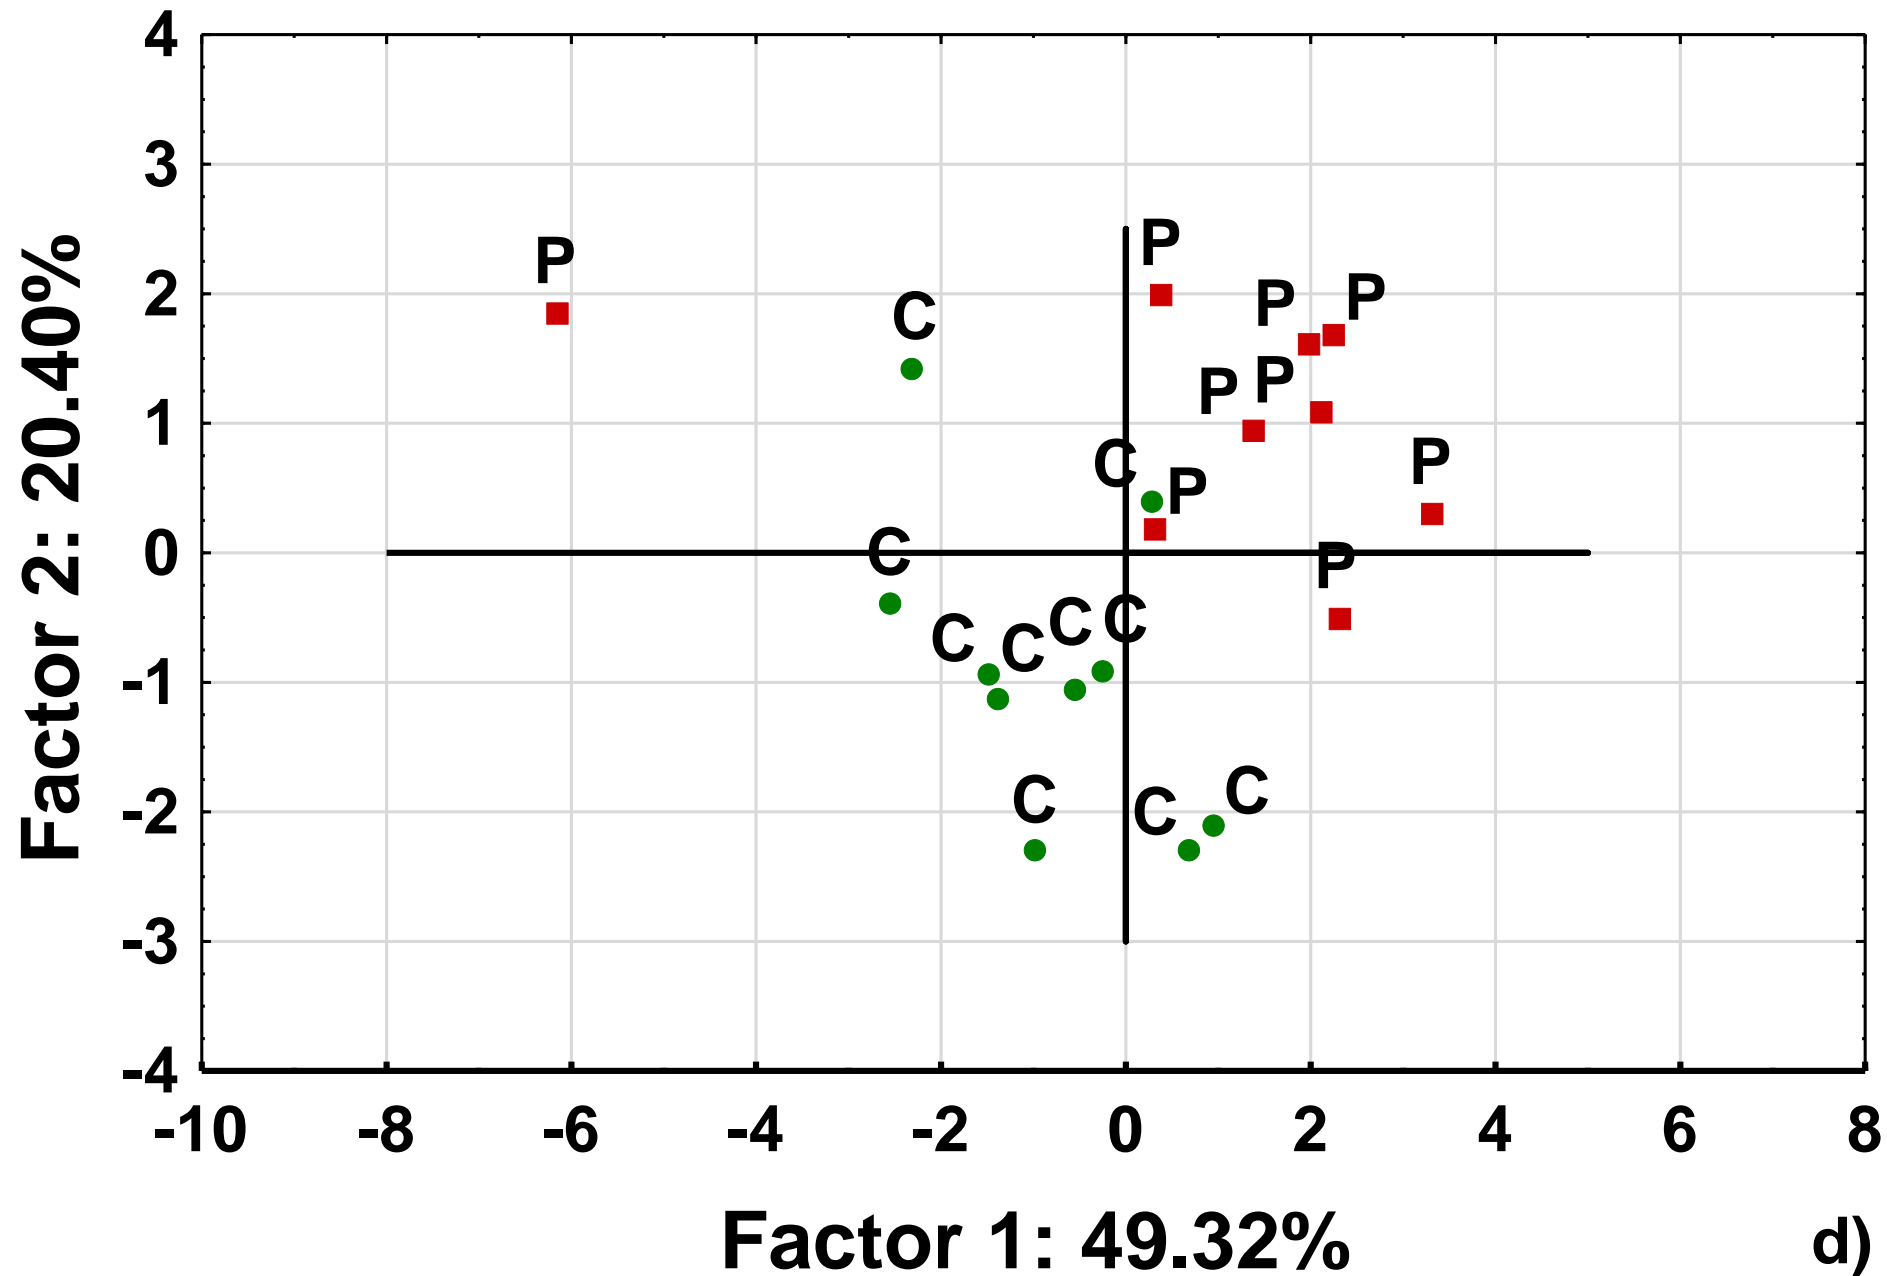

# Cultivating room / Wendy / Control

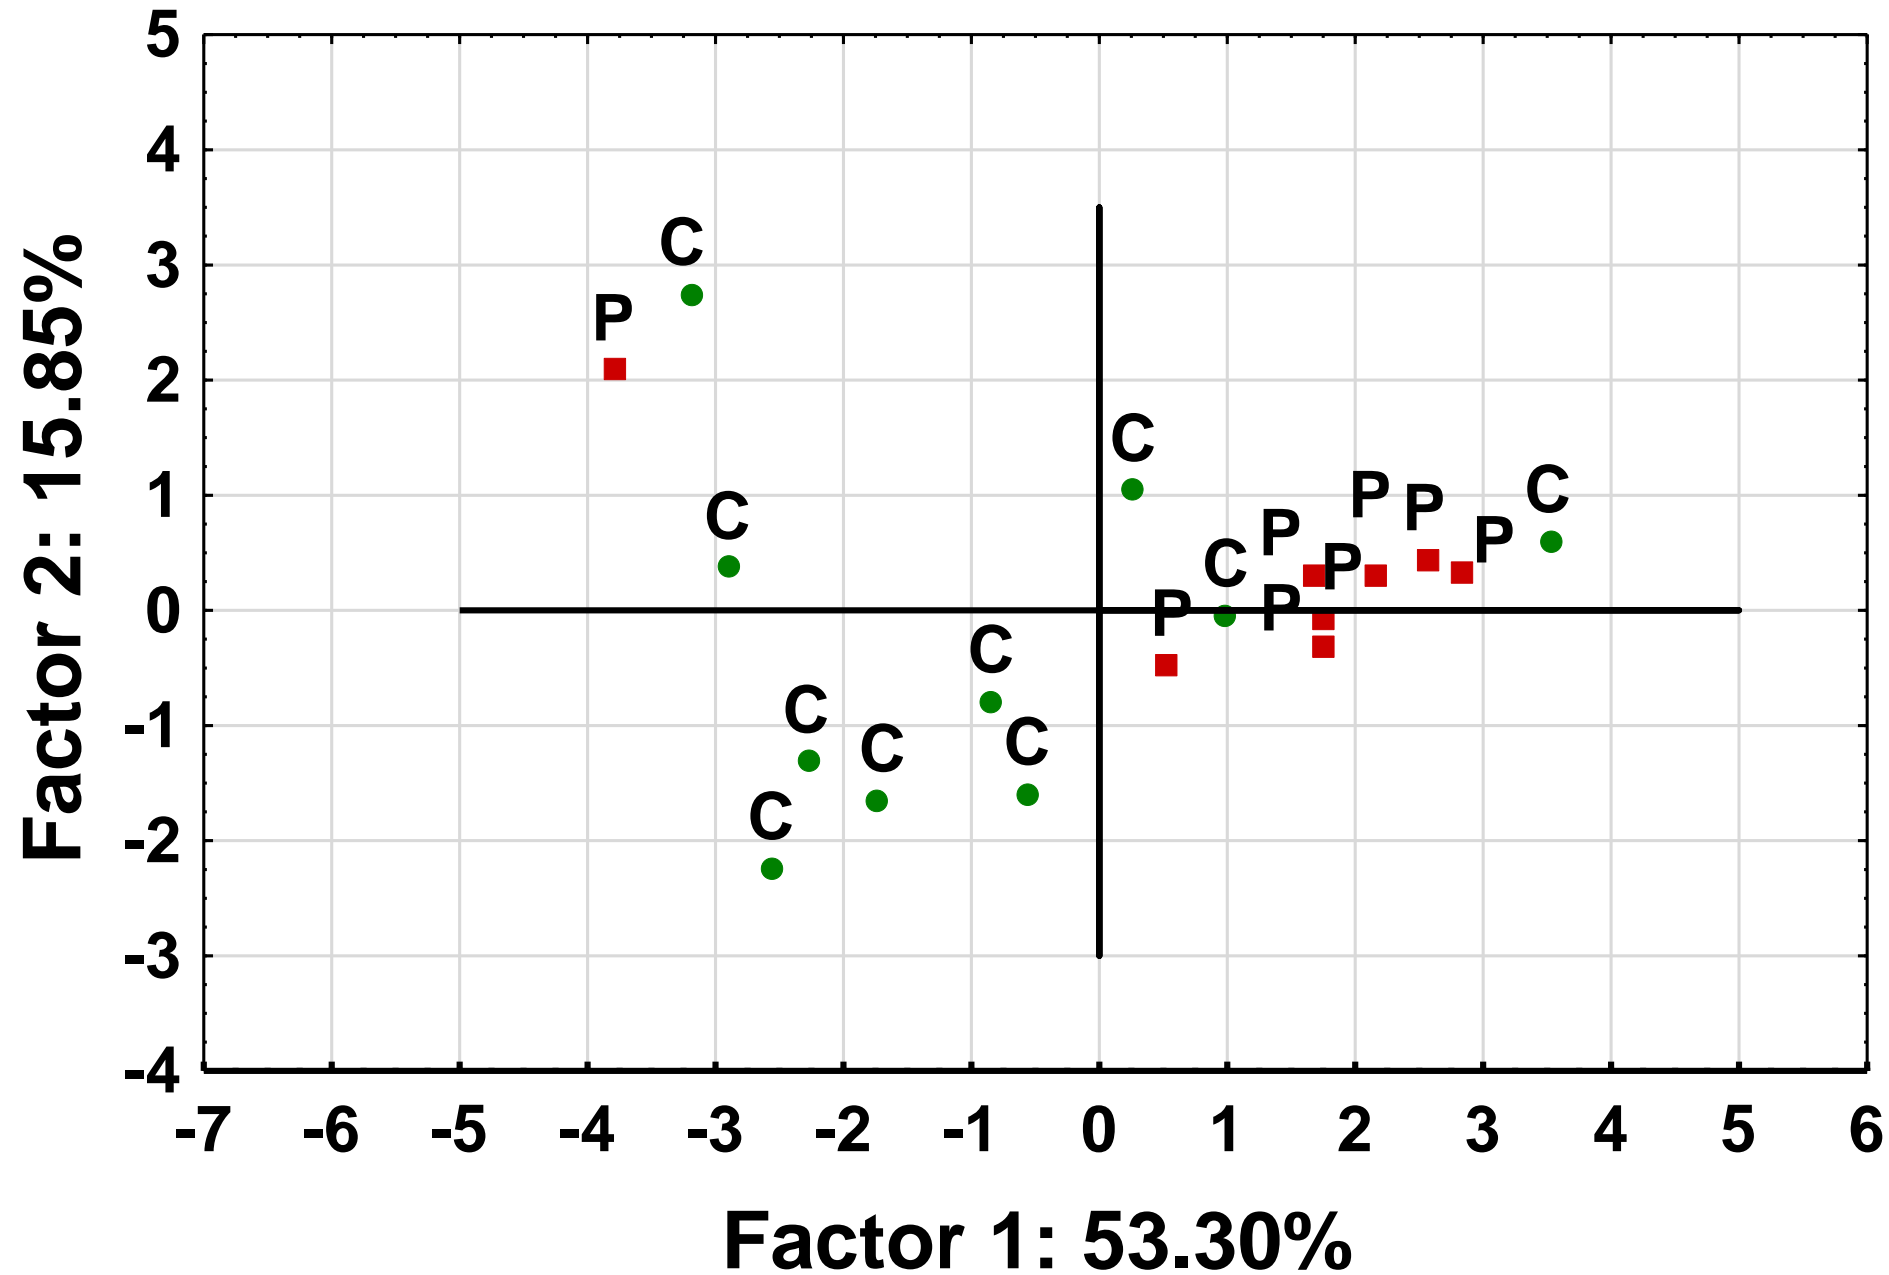

# Greenhouse / Karmen / Prometheus

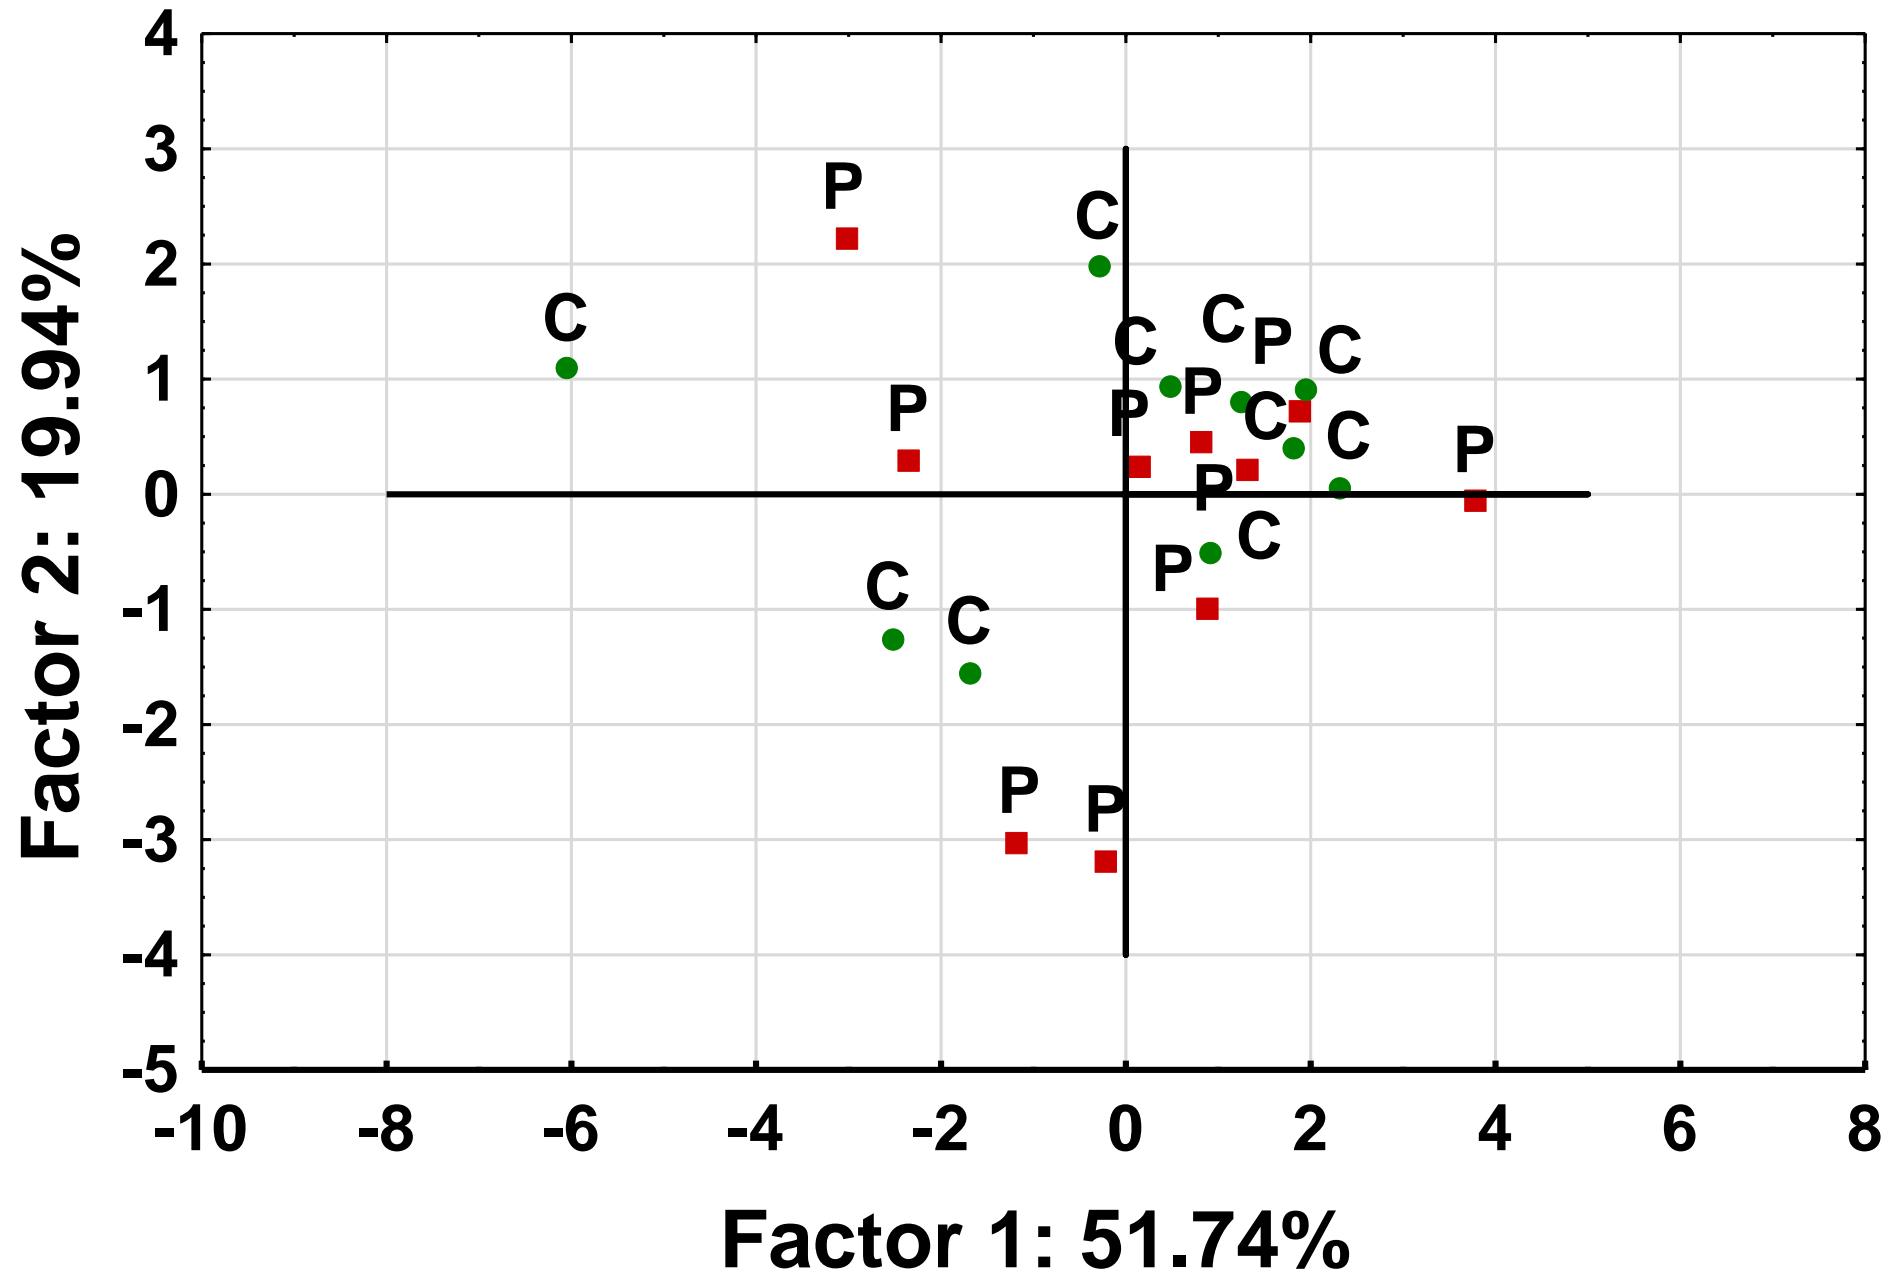

# Greenhouse / Karmen / Hirundo

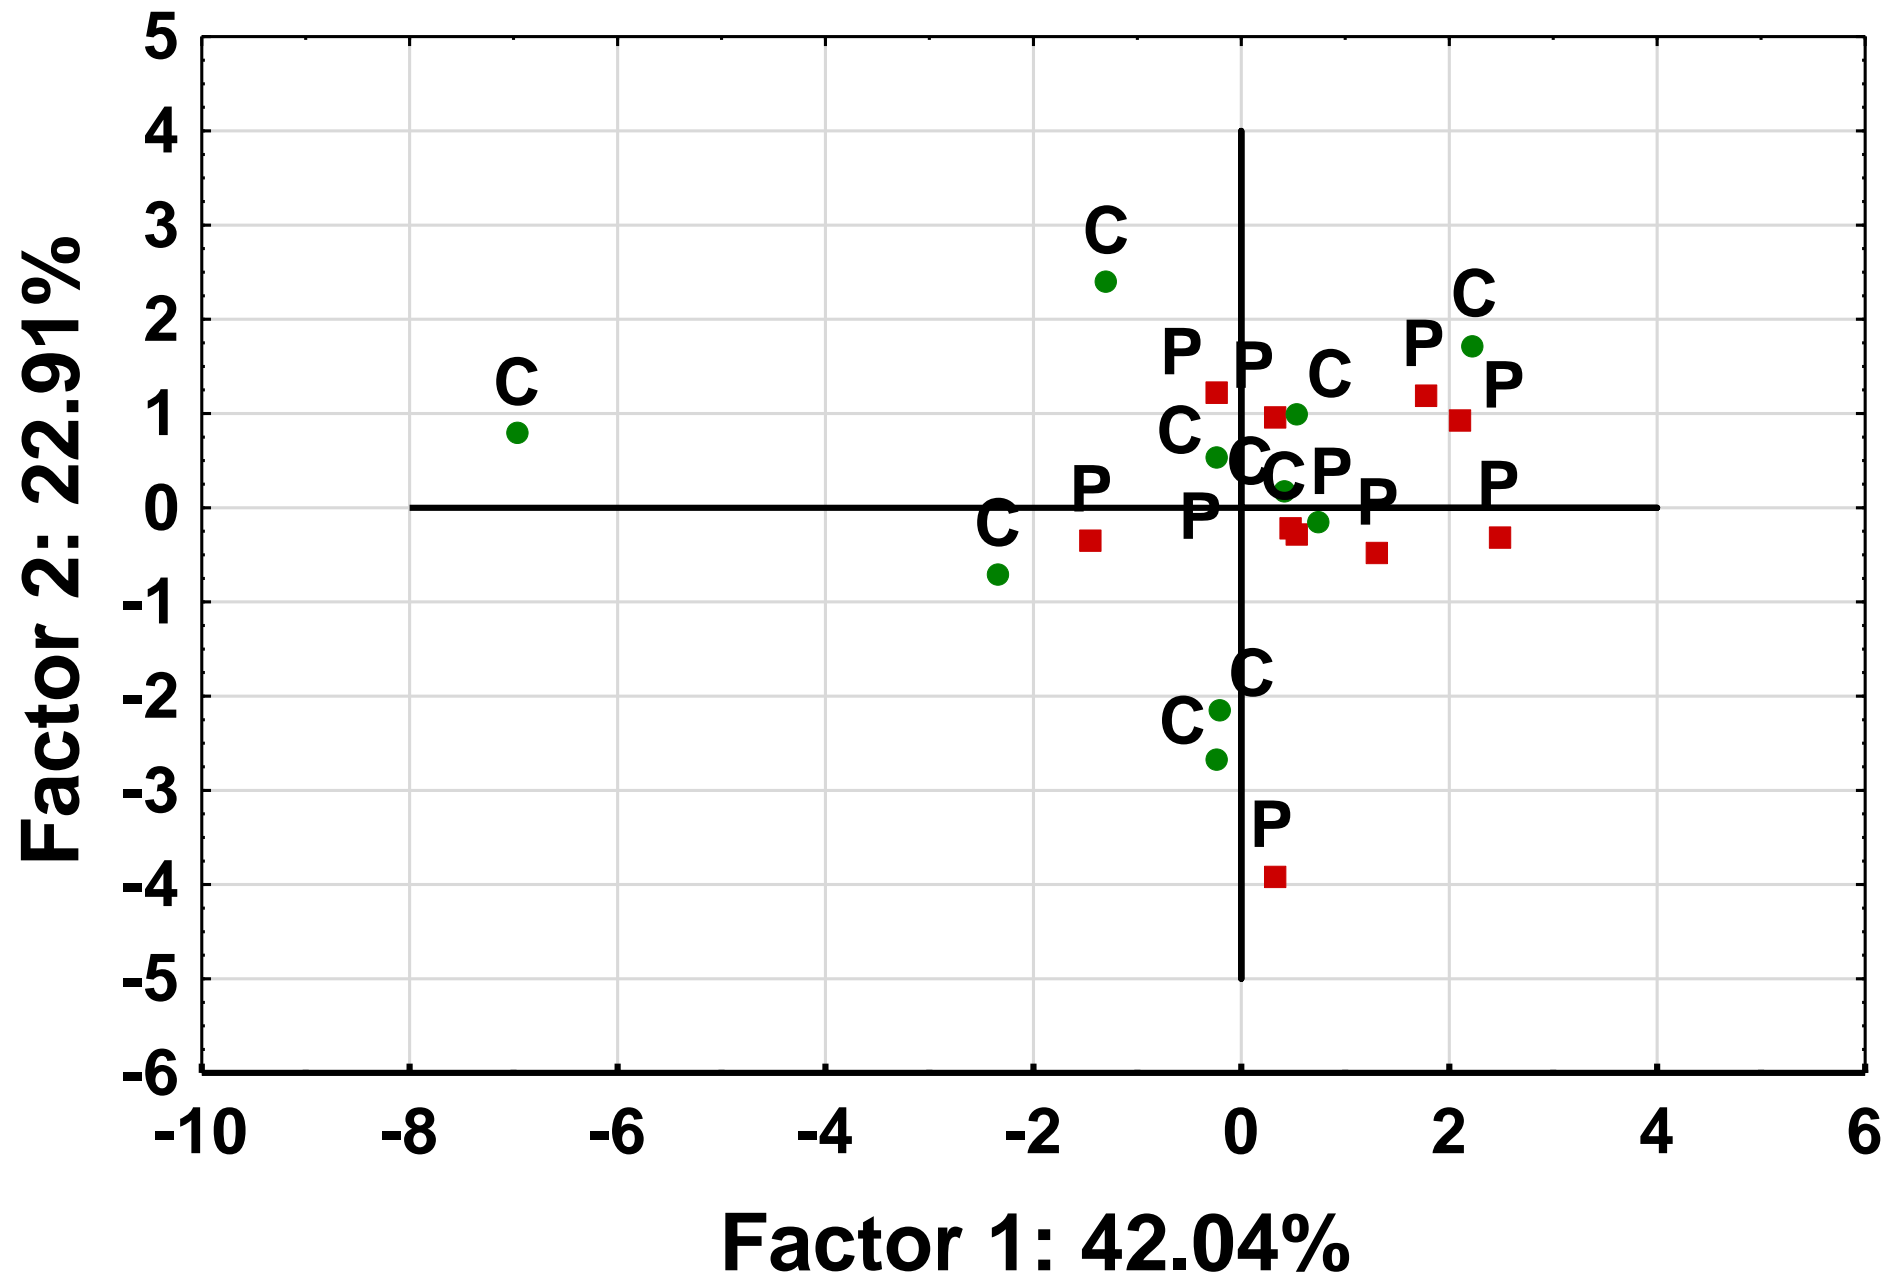

# Greenhouse / Karmen / Xilon

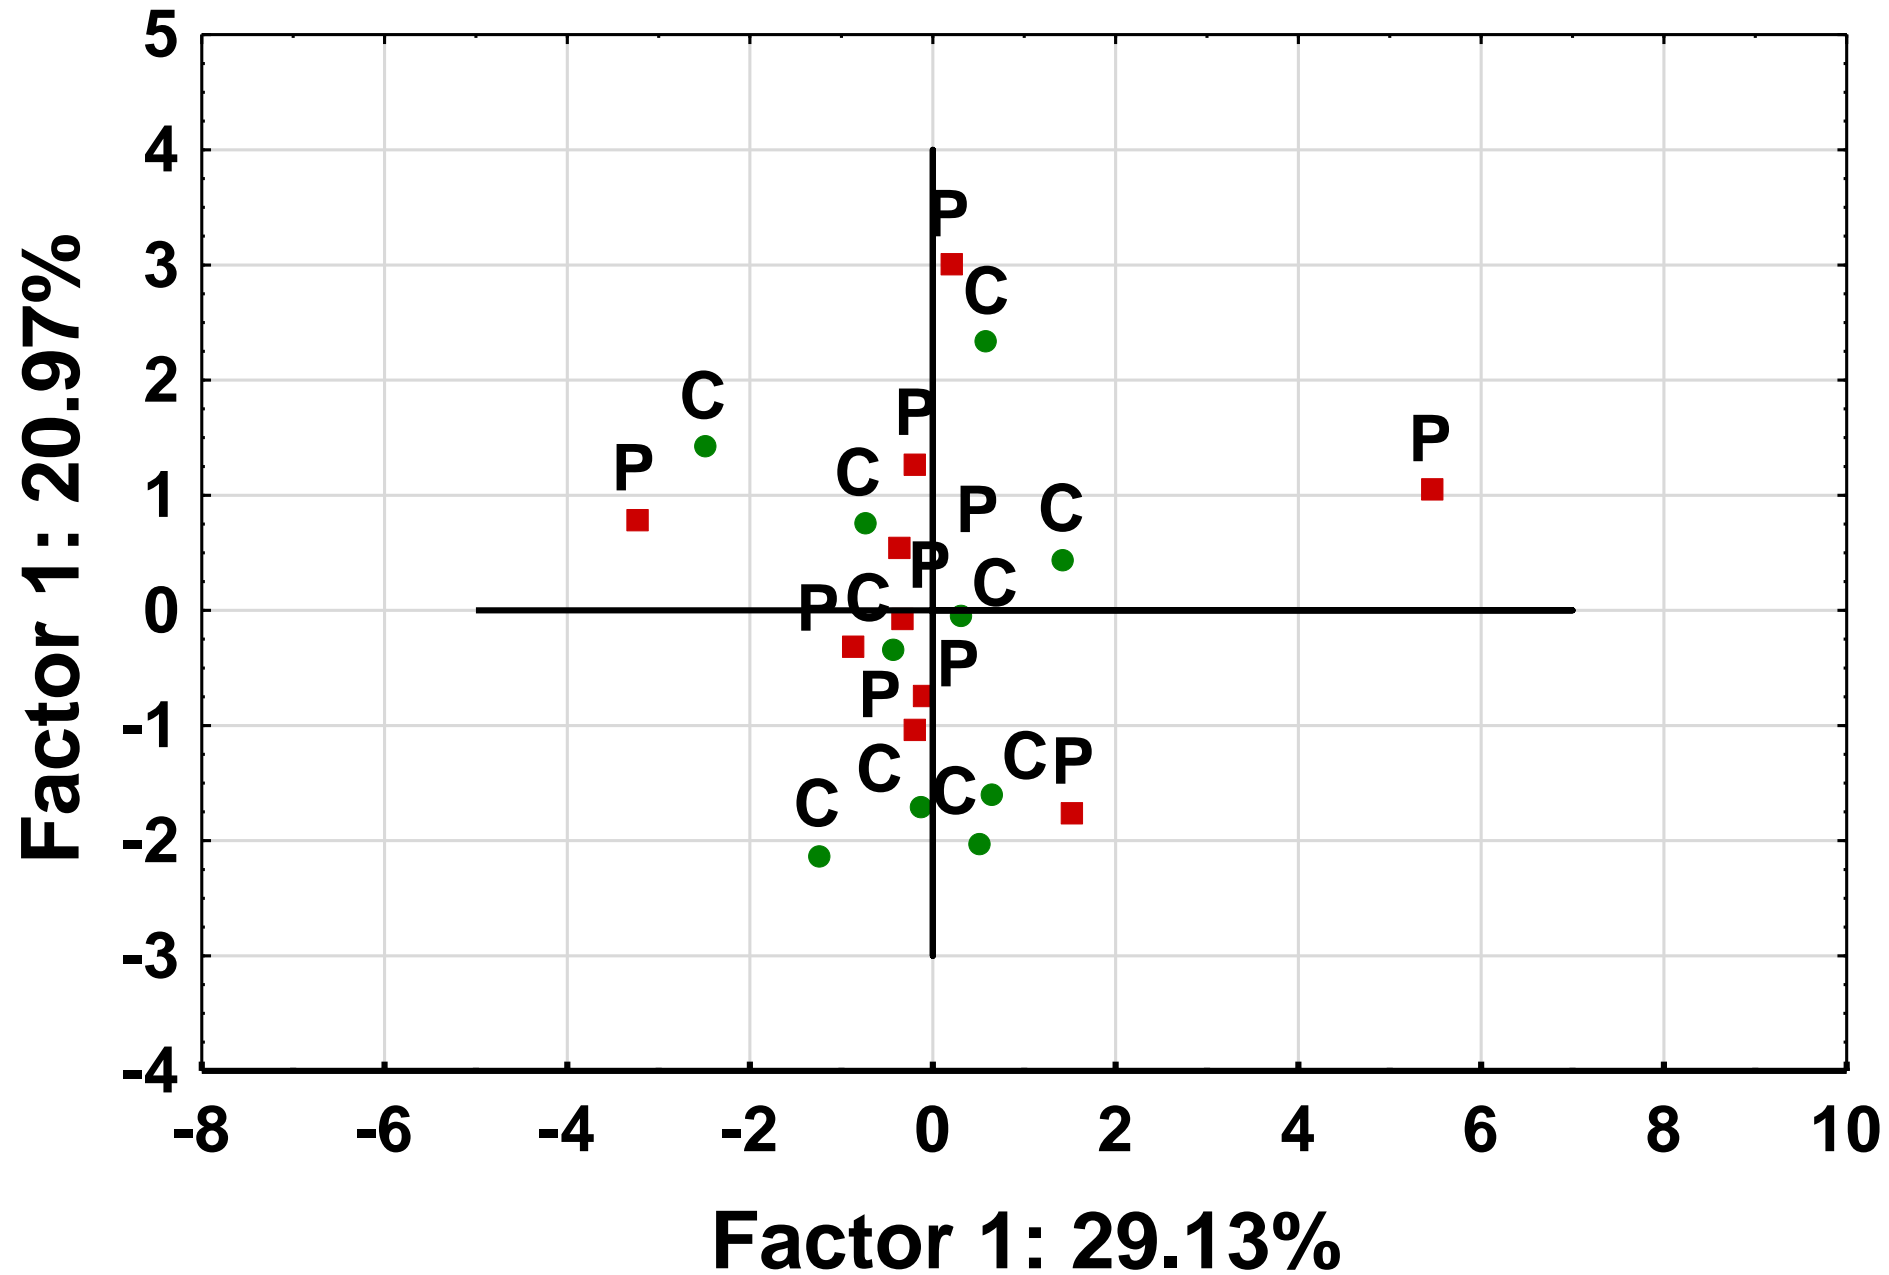

# Greenhouse / Karmen / Pseudomonas sp.

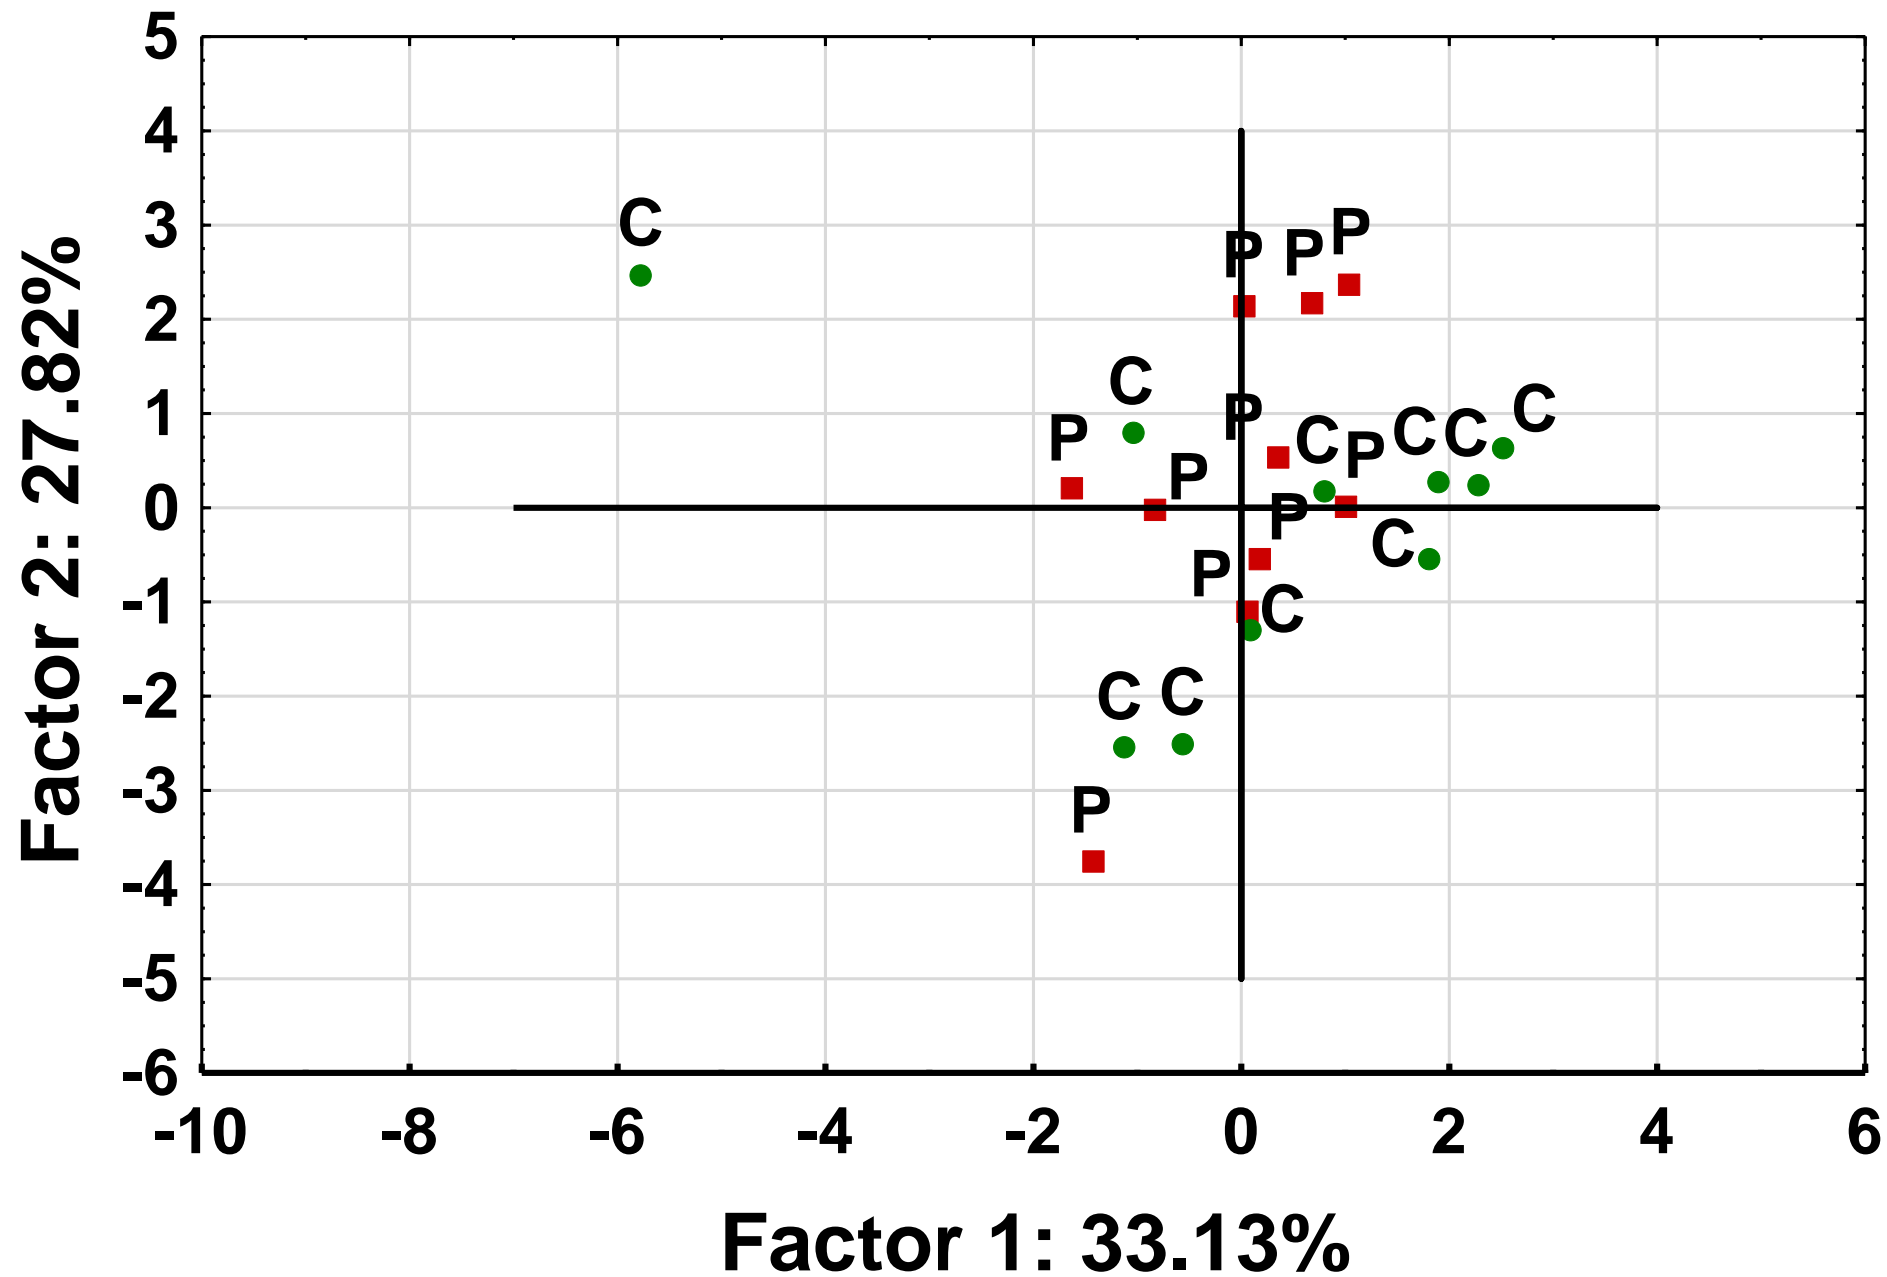

# Greenhouse / Karmen / Control

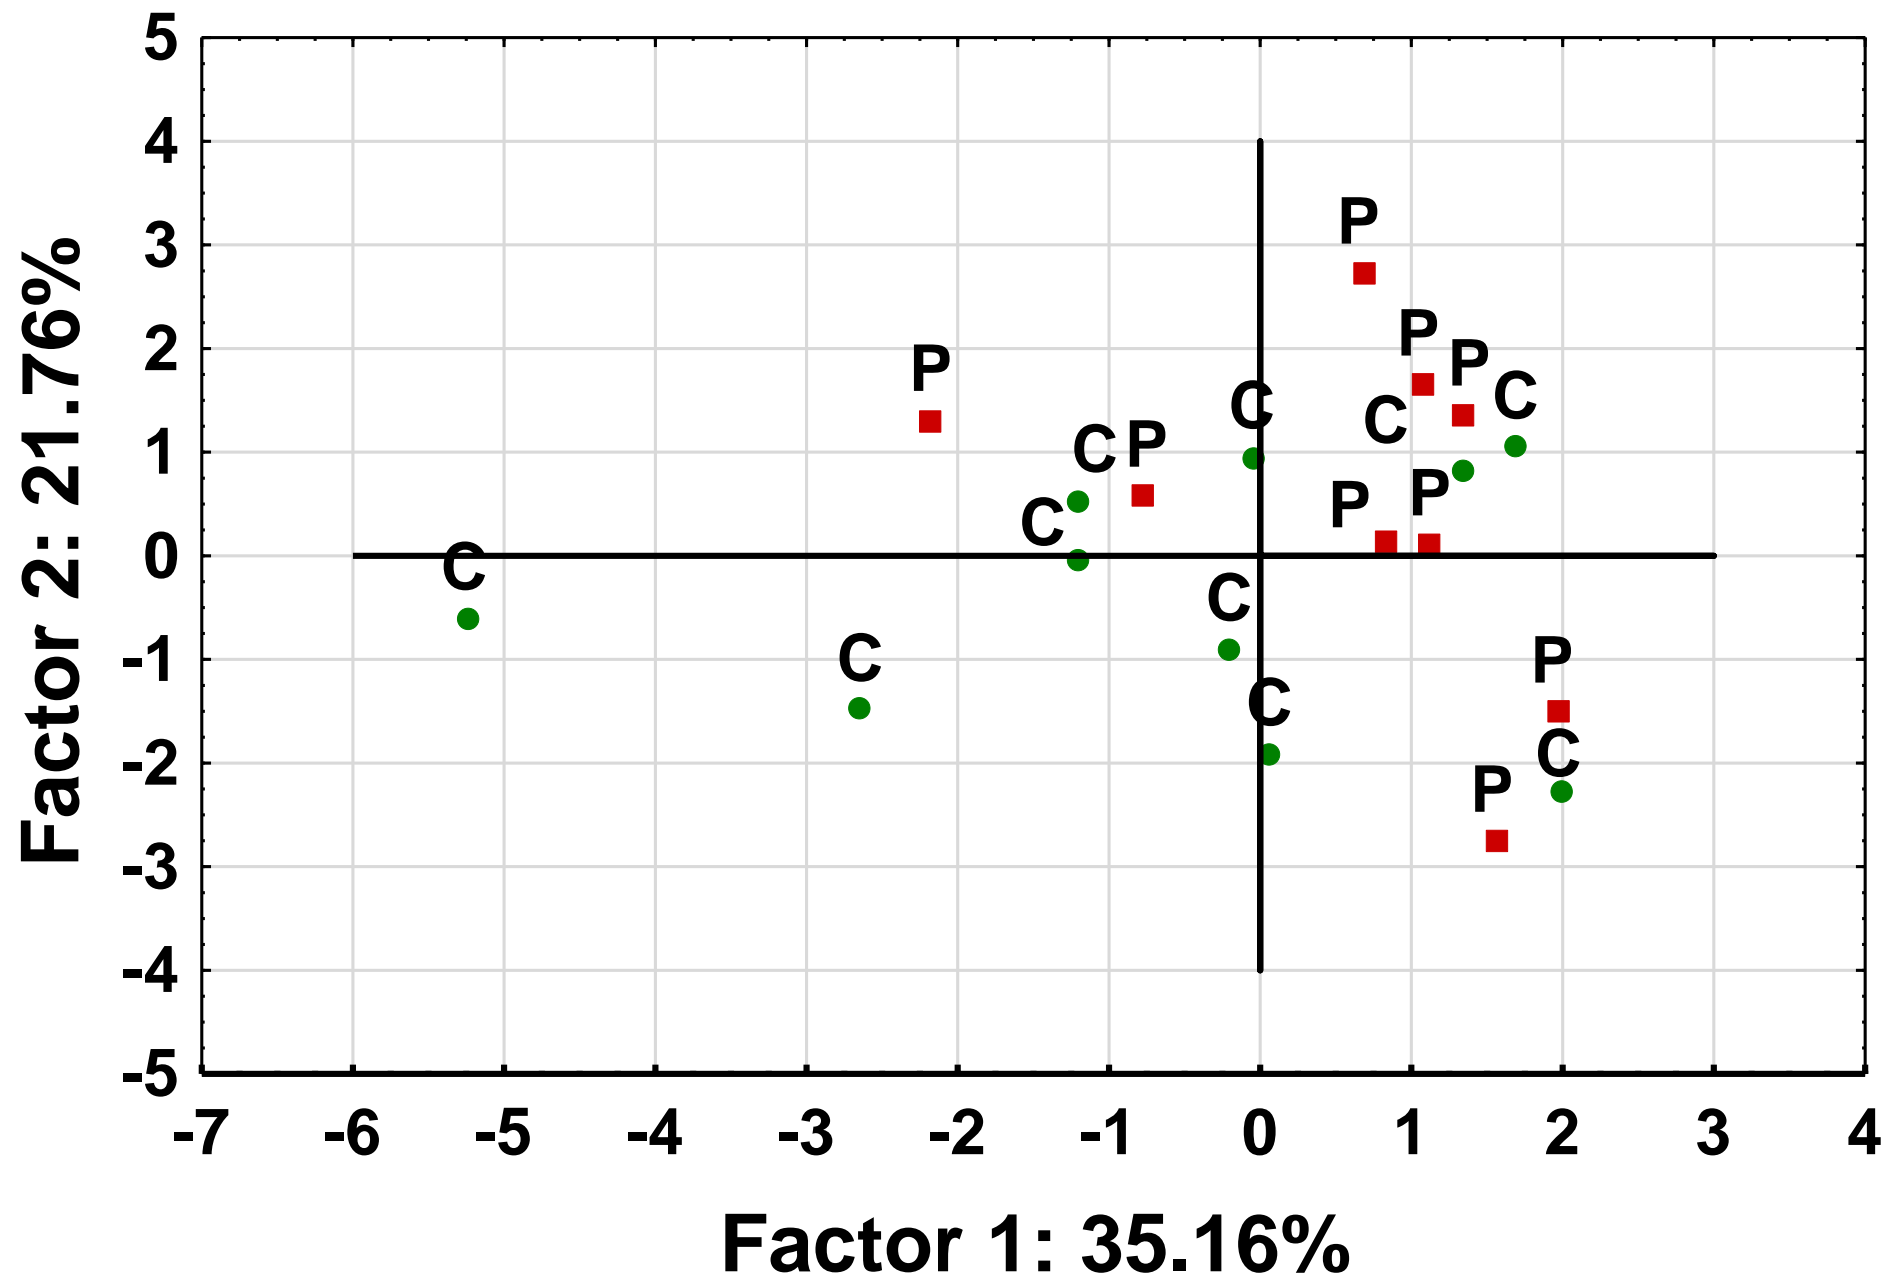

# Greenhouse / Karmen / Contans

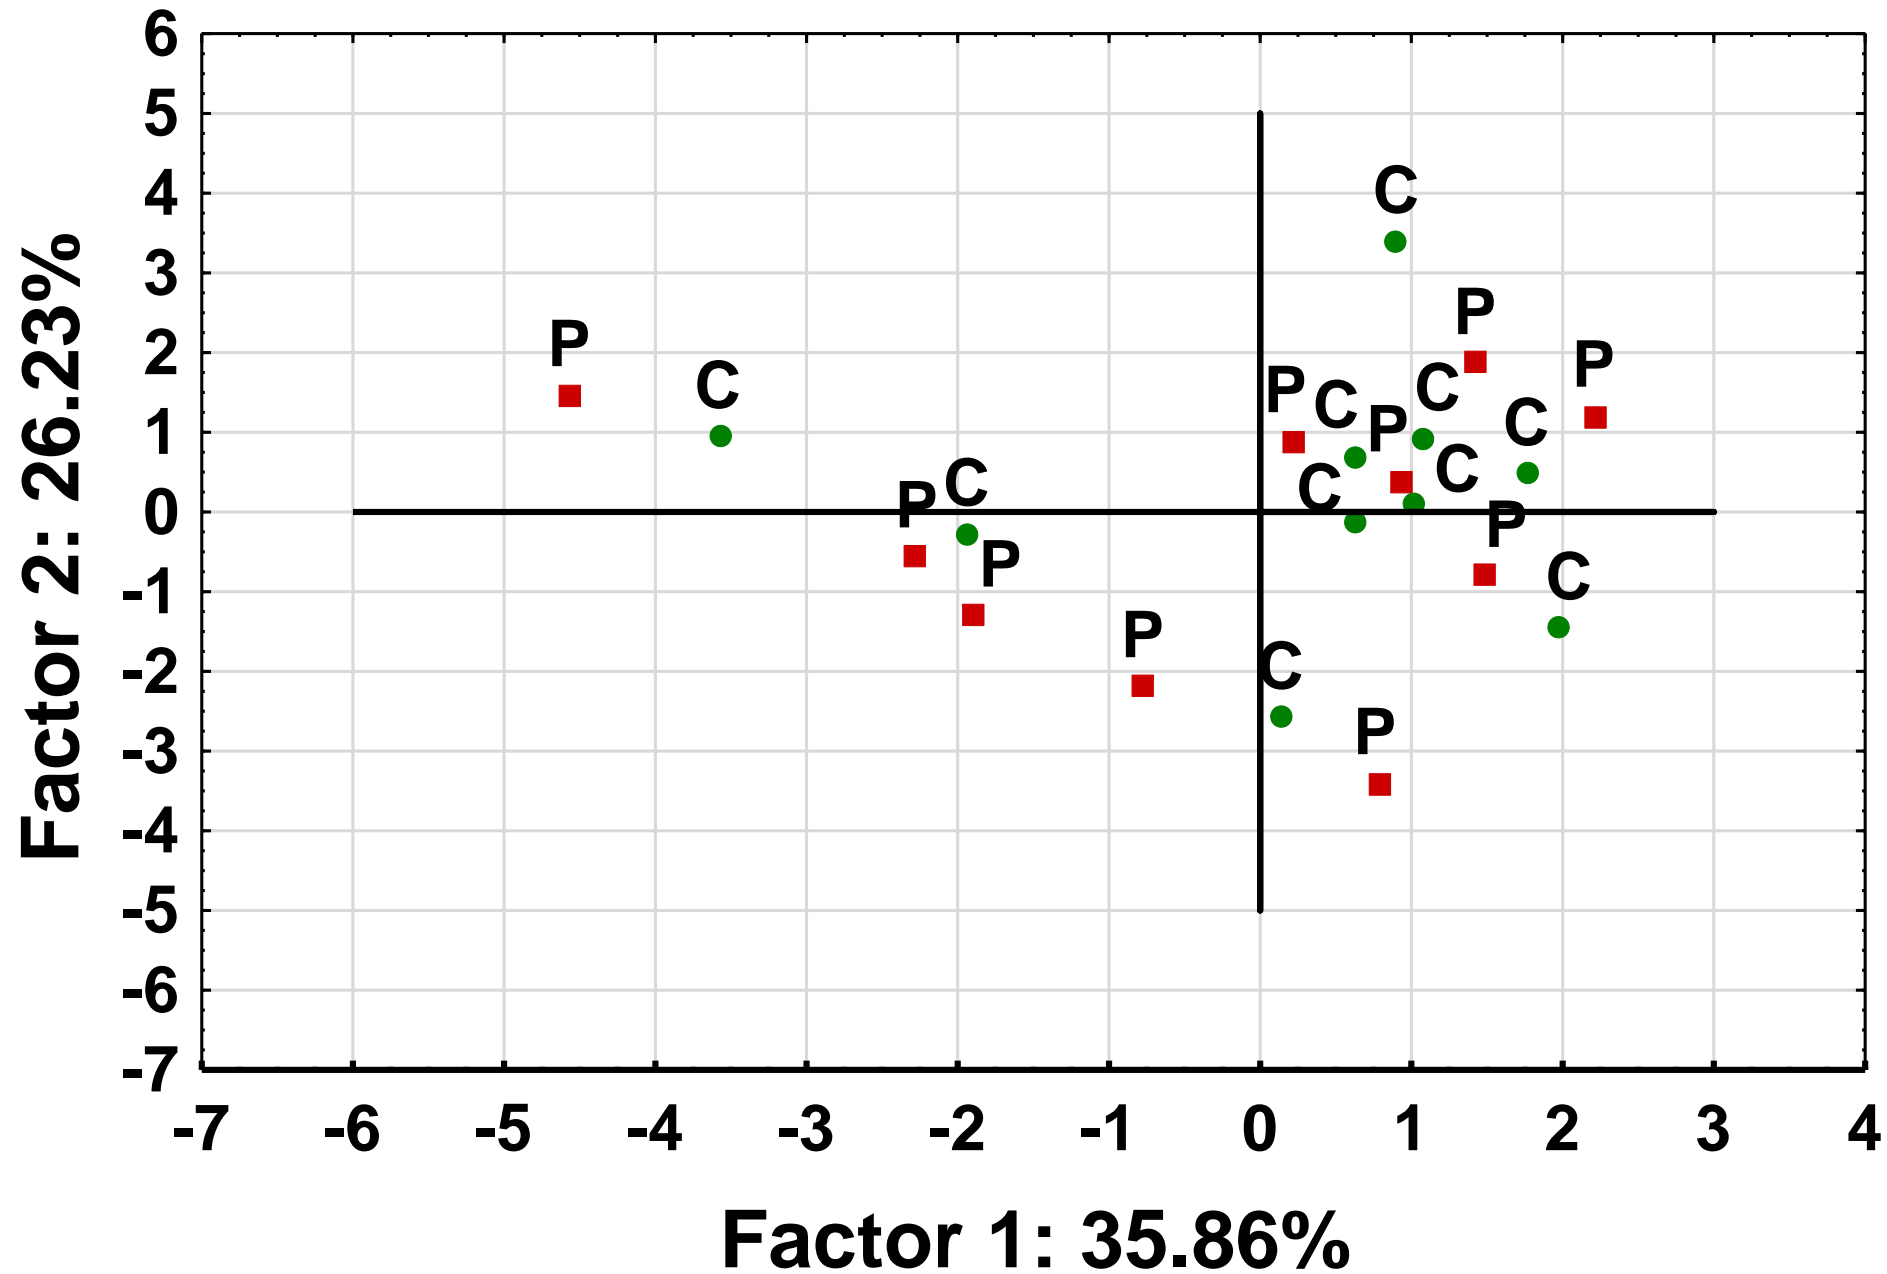

# Greenhouse / Karmen / Clonoplus

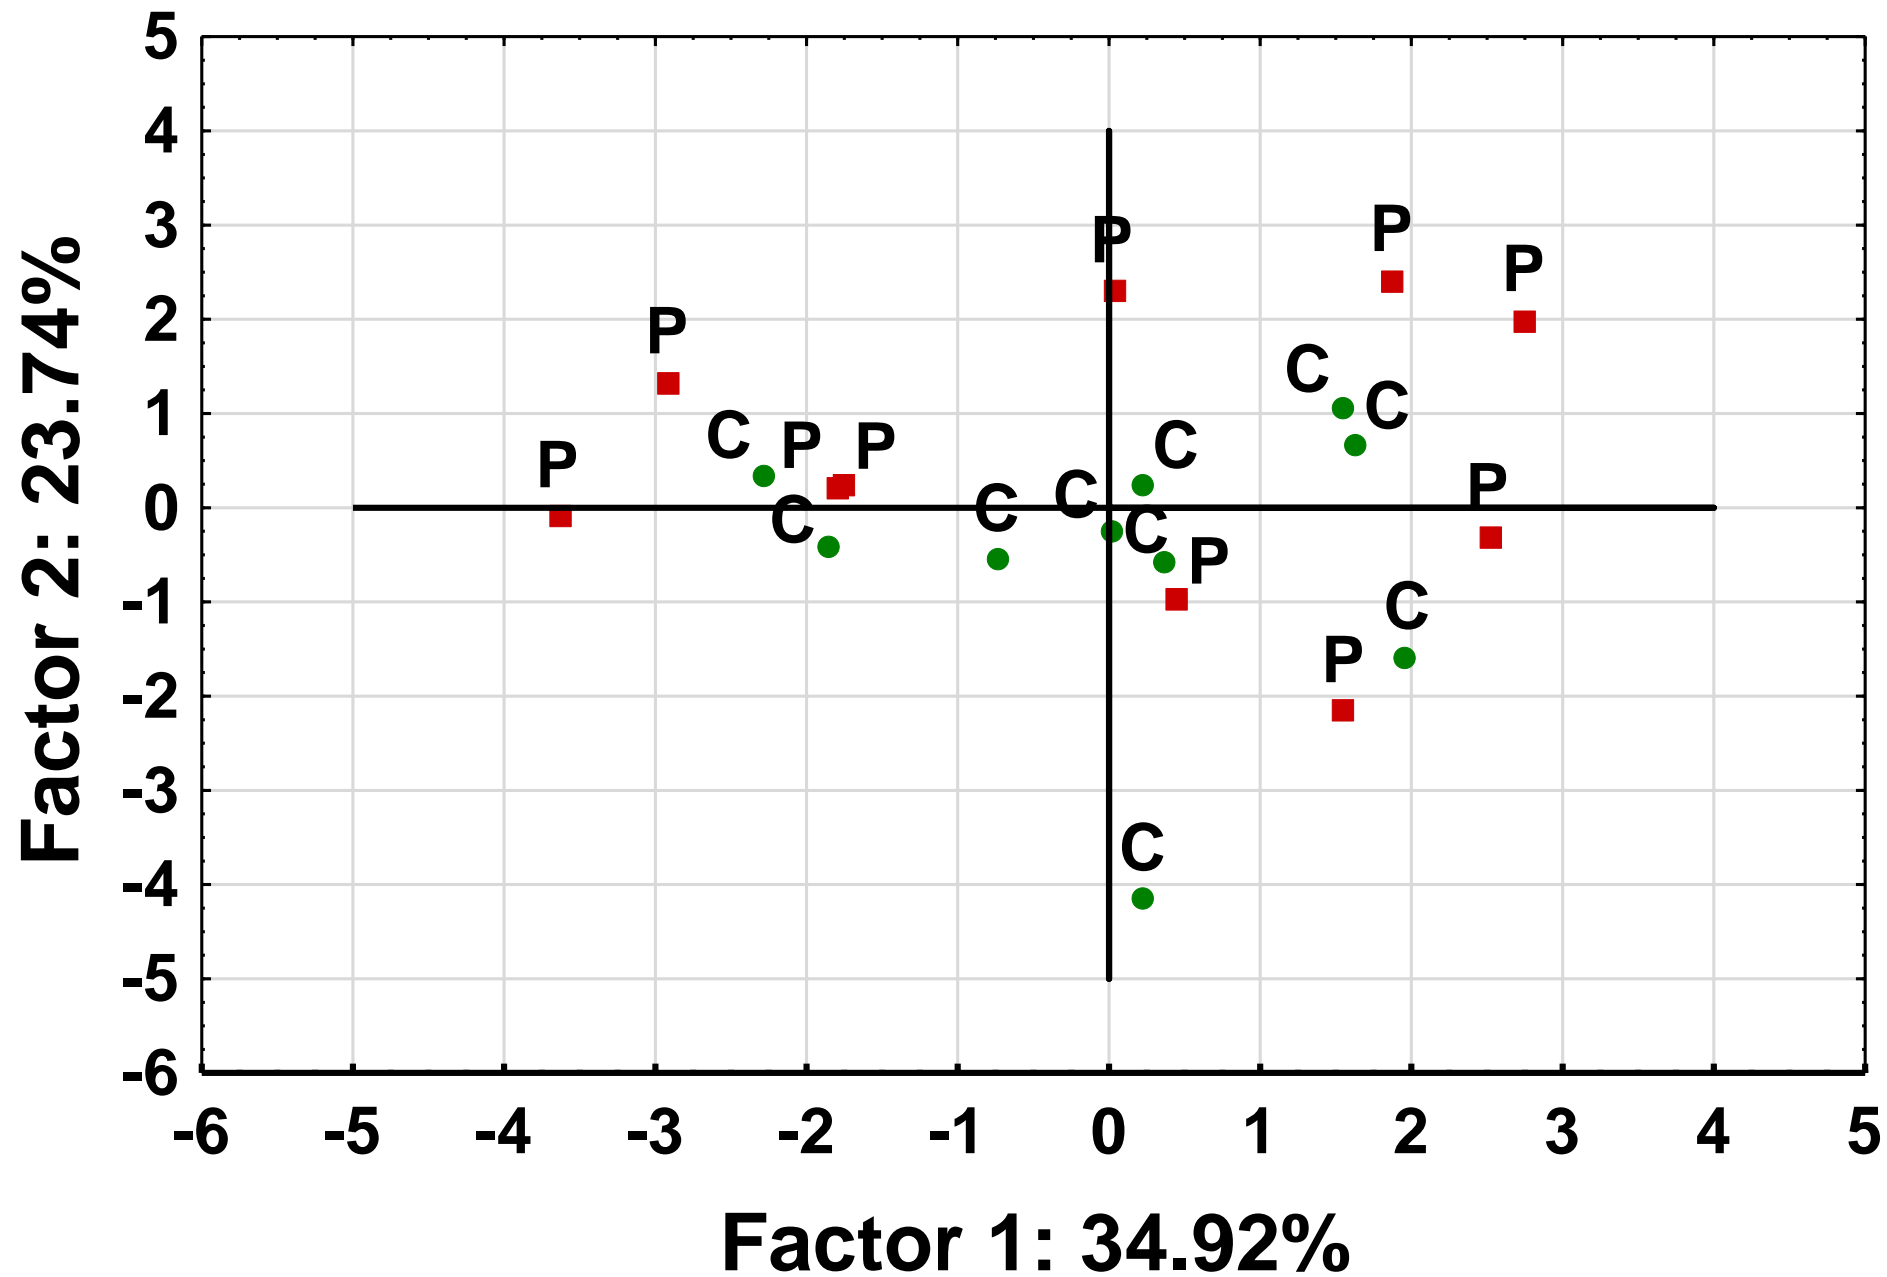

# Greenhouse / Karmen / Polyversum

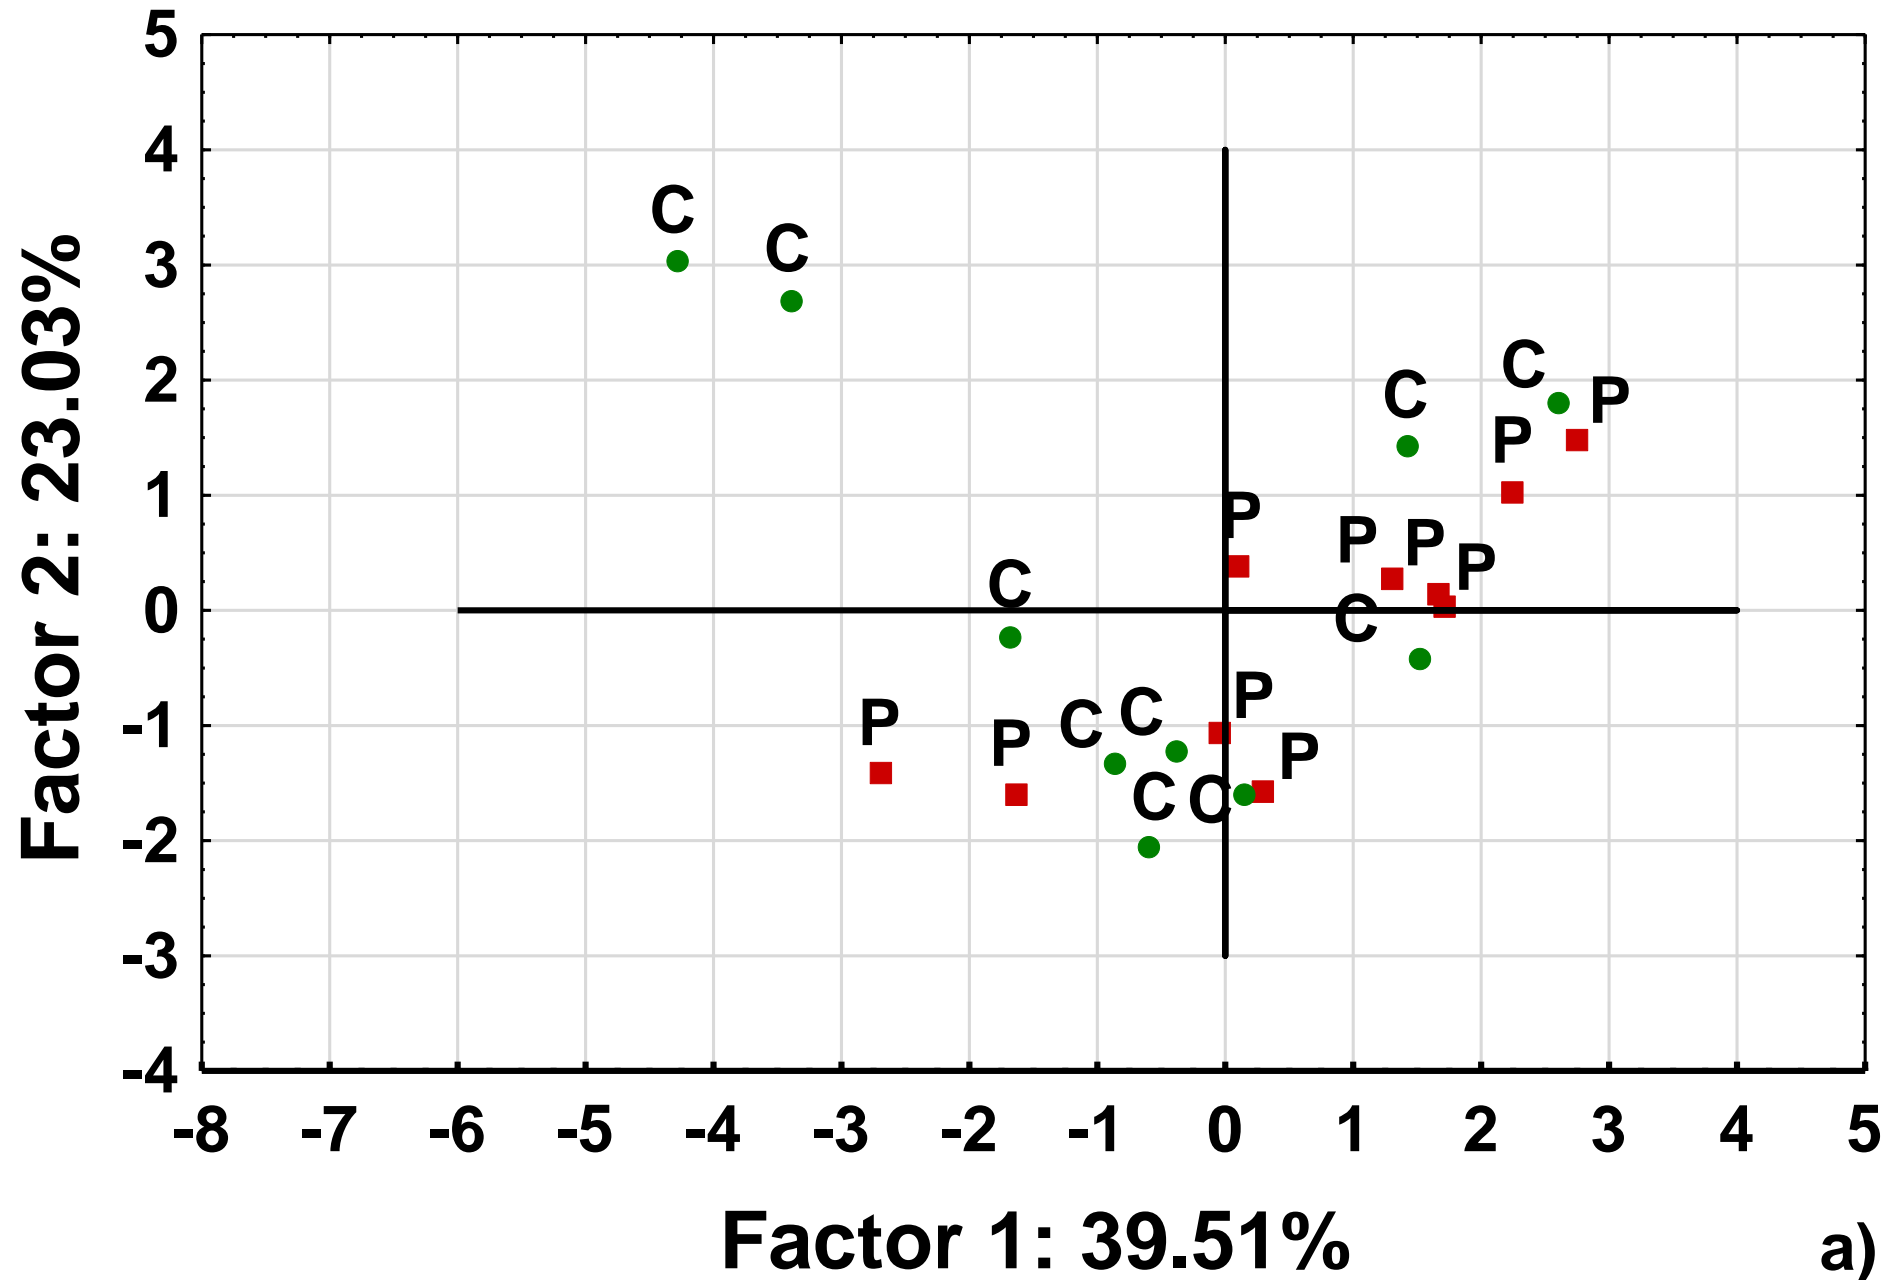

# Greenhouse / Sonata / Xilon

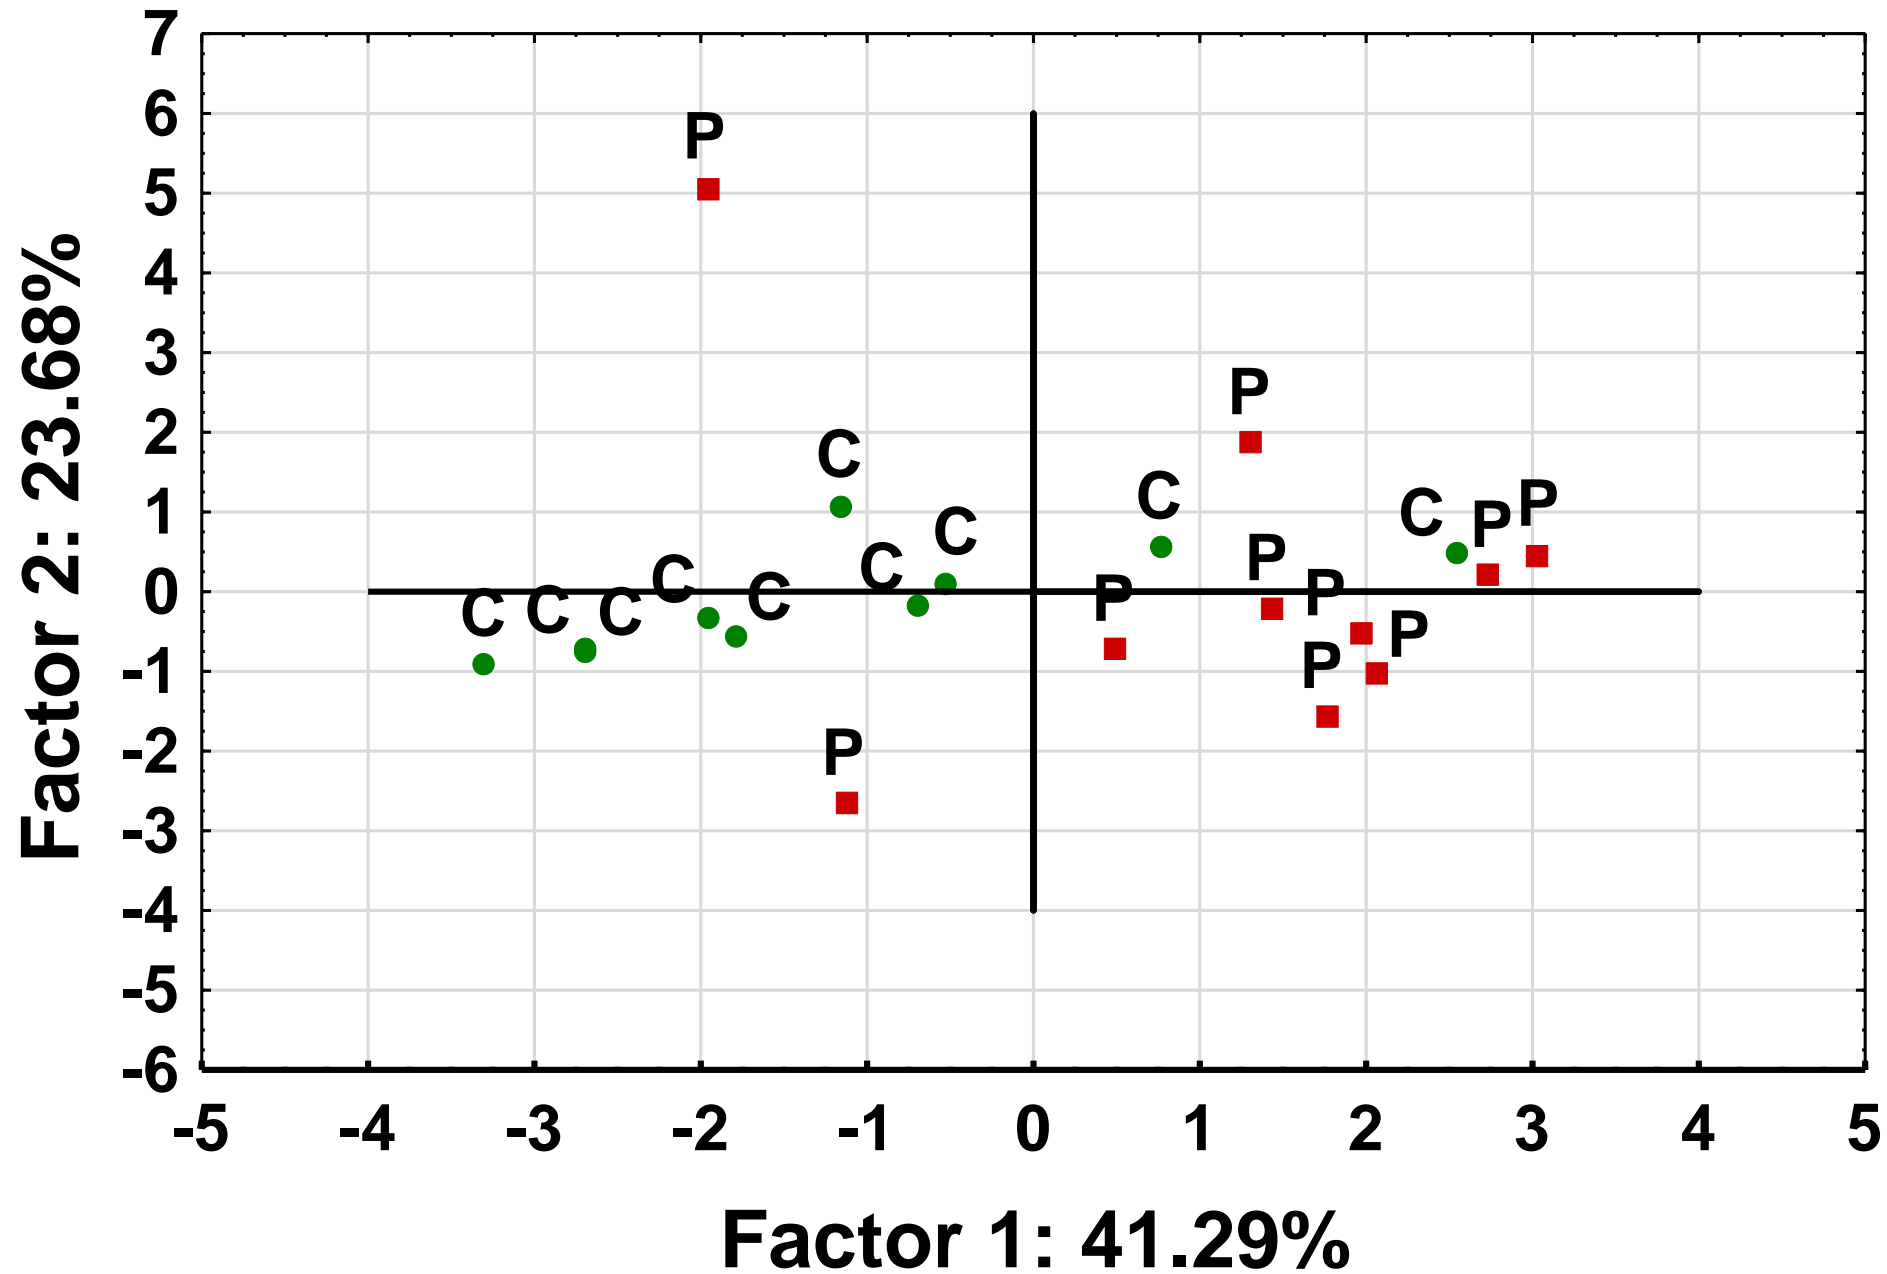

# Greenhouse / Sonata / Polyversum

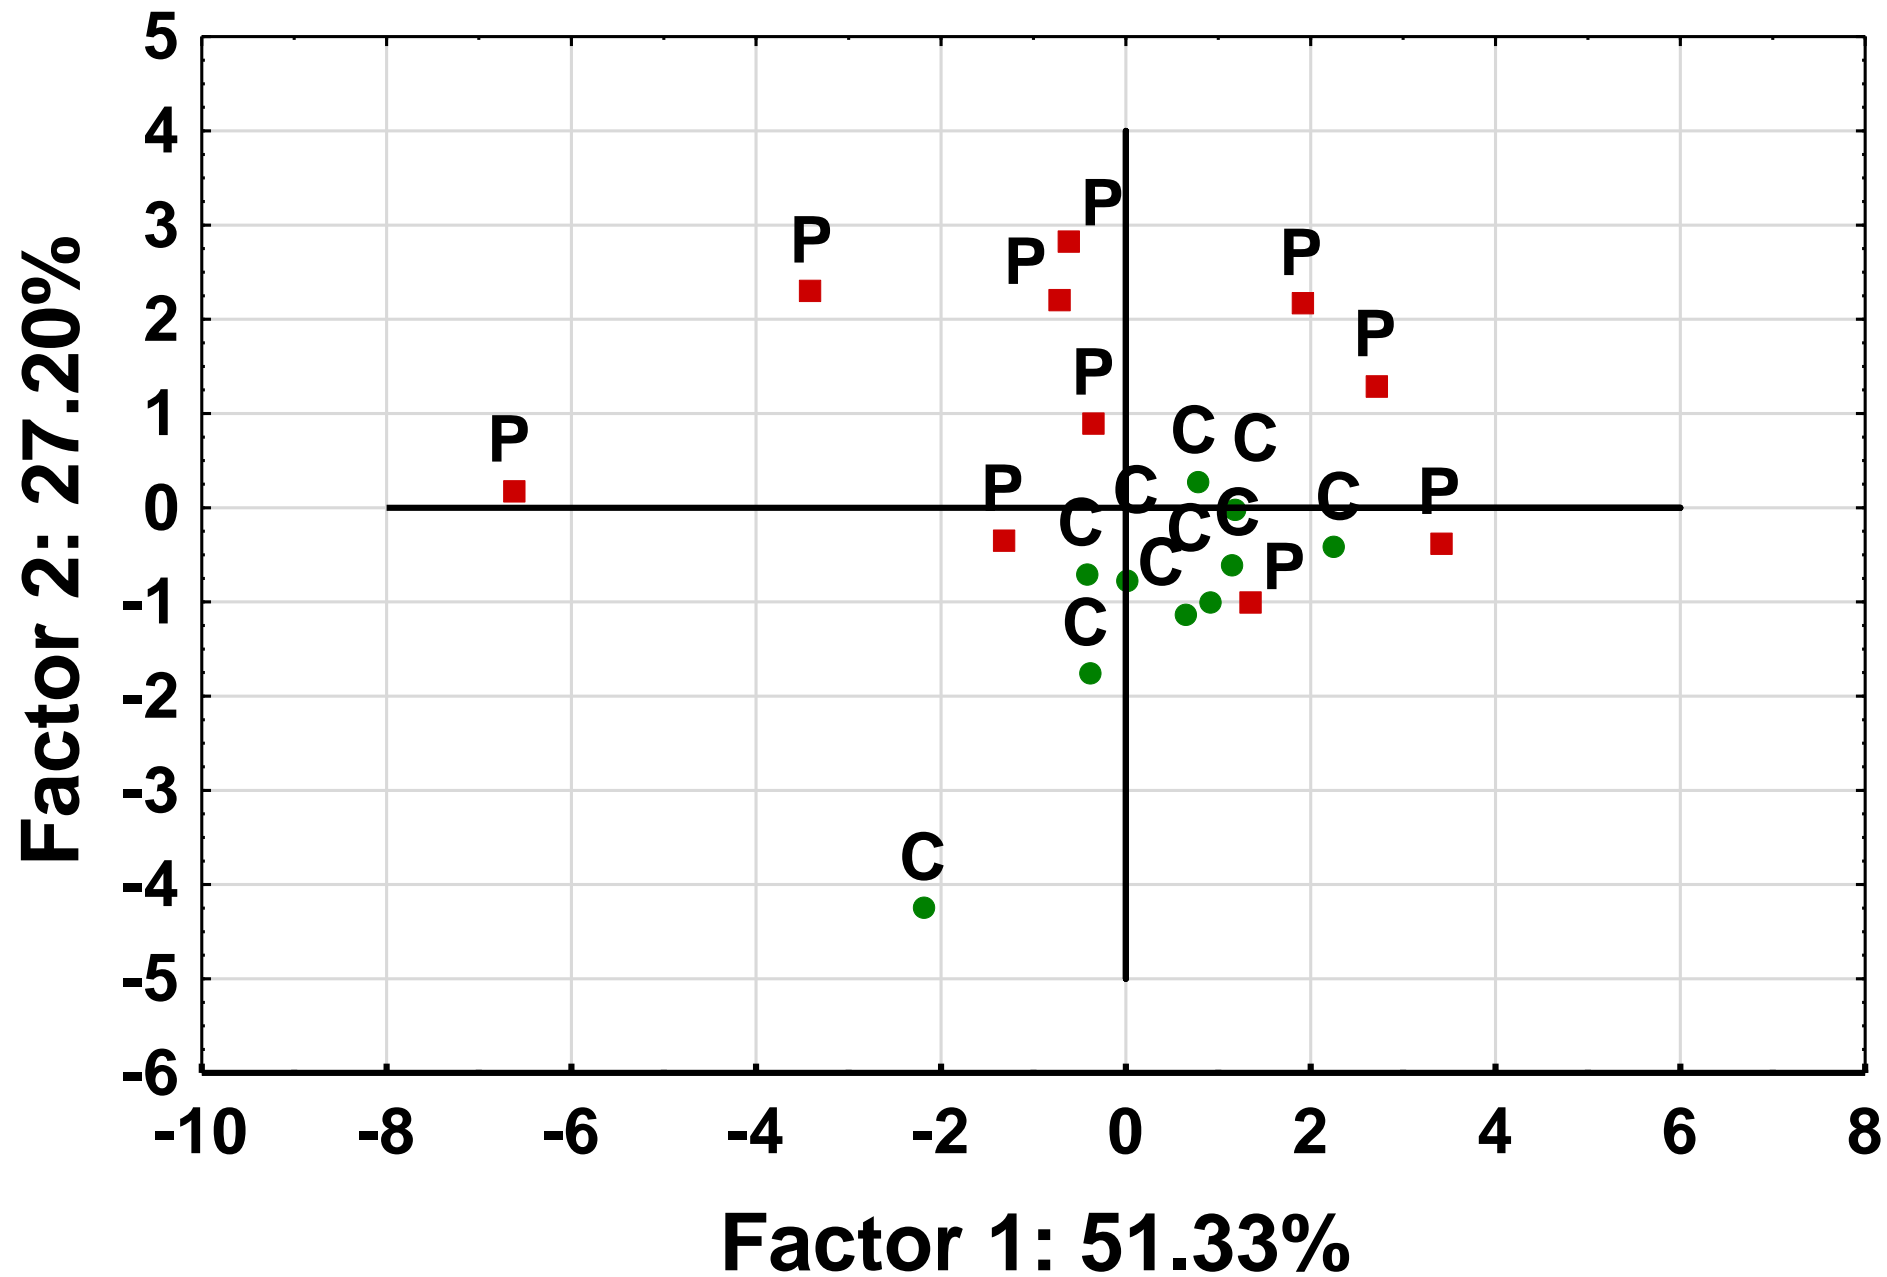

# Greenhouse / Sonata / Hirundo

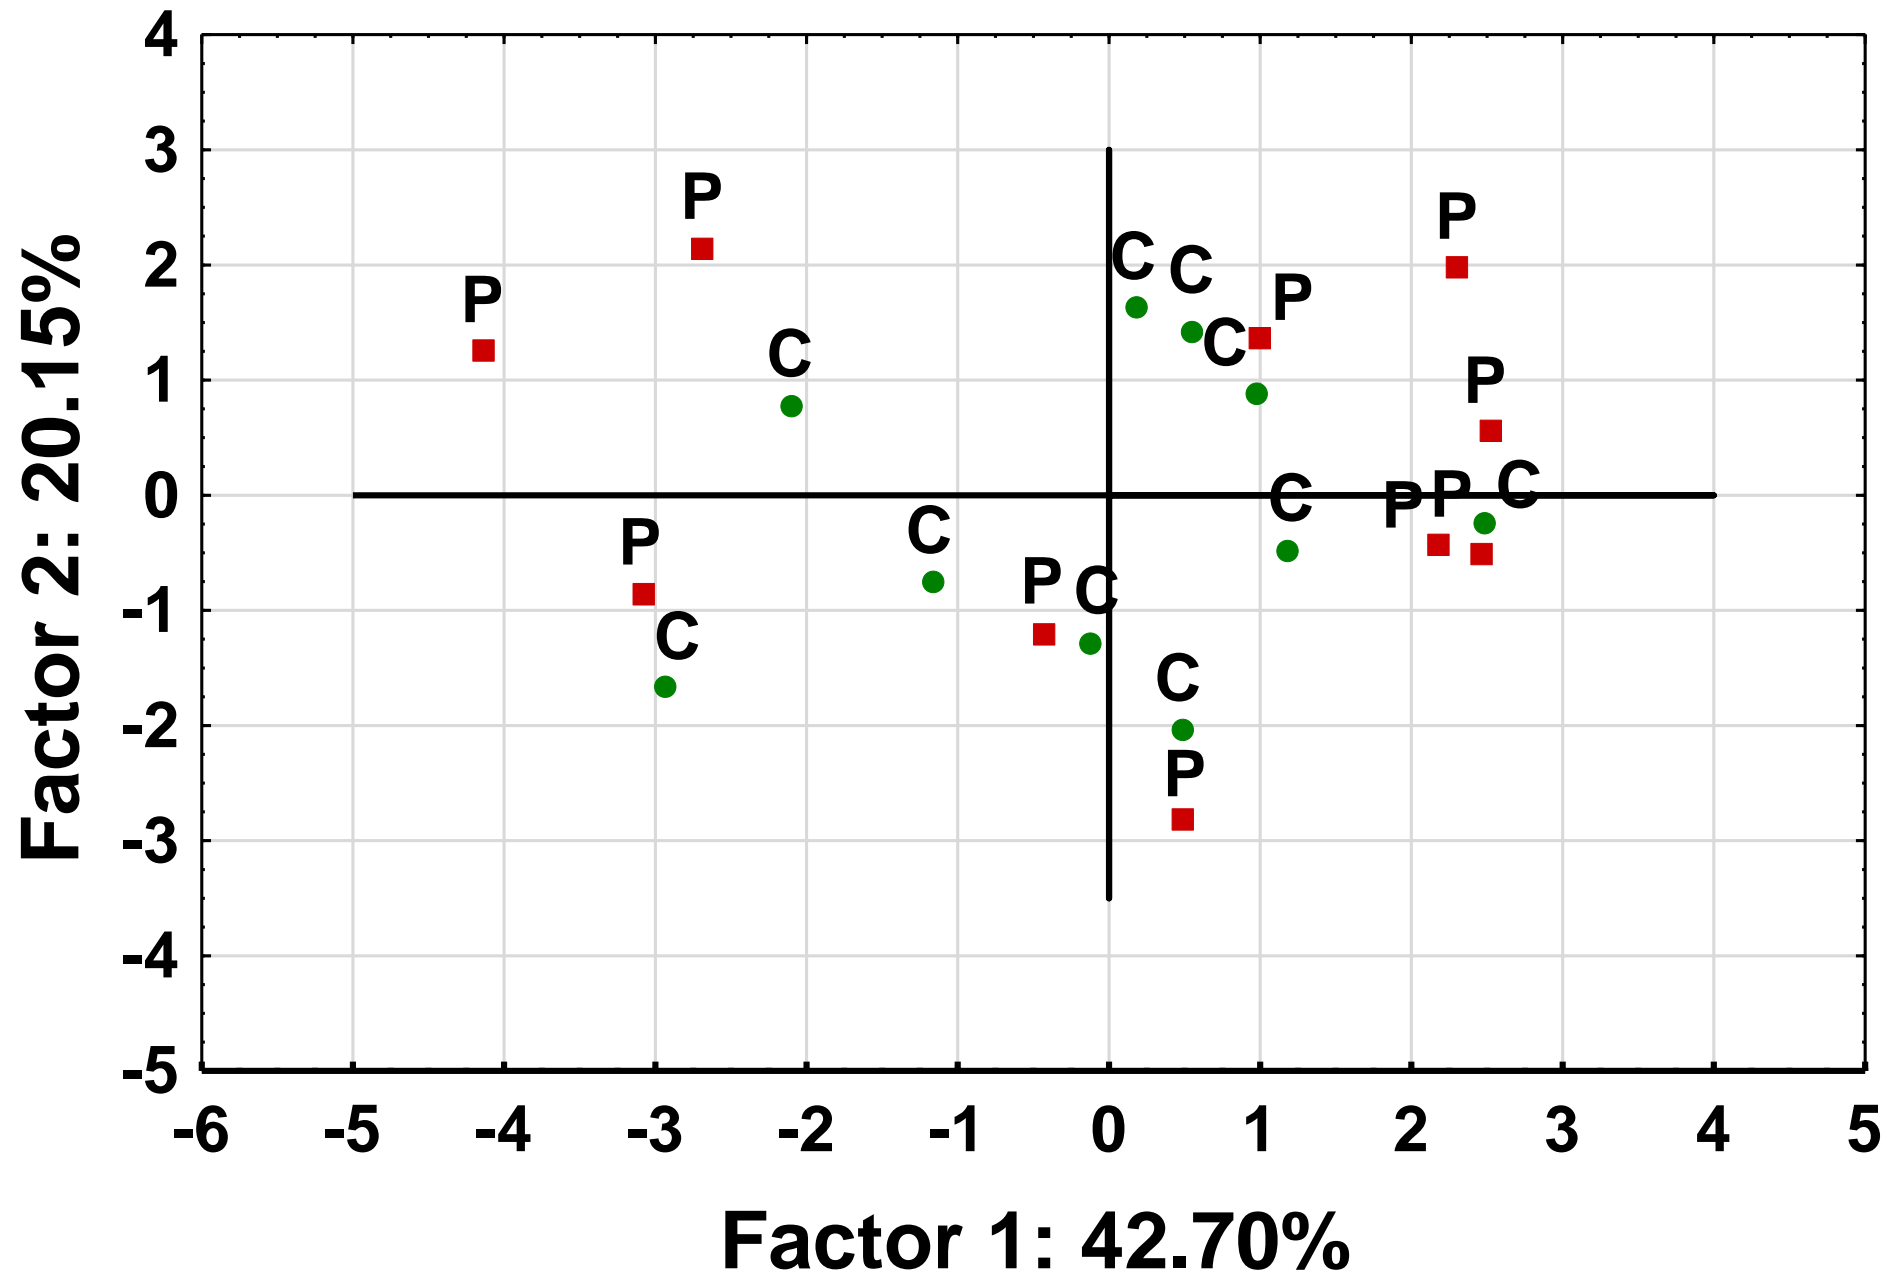

# Greenhouse / Sonata / Integral Pro

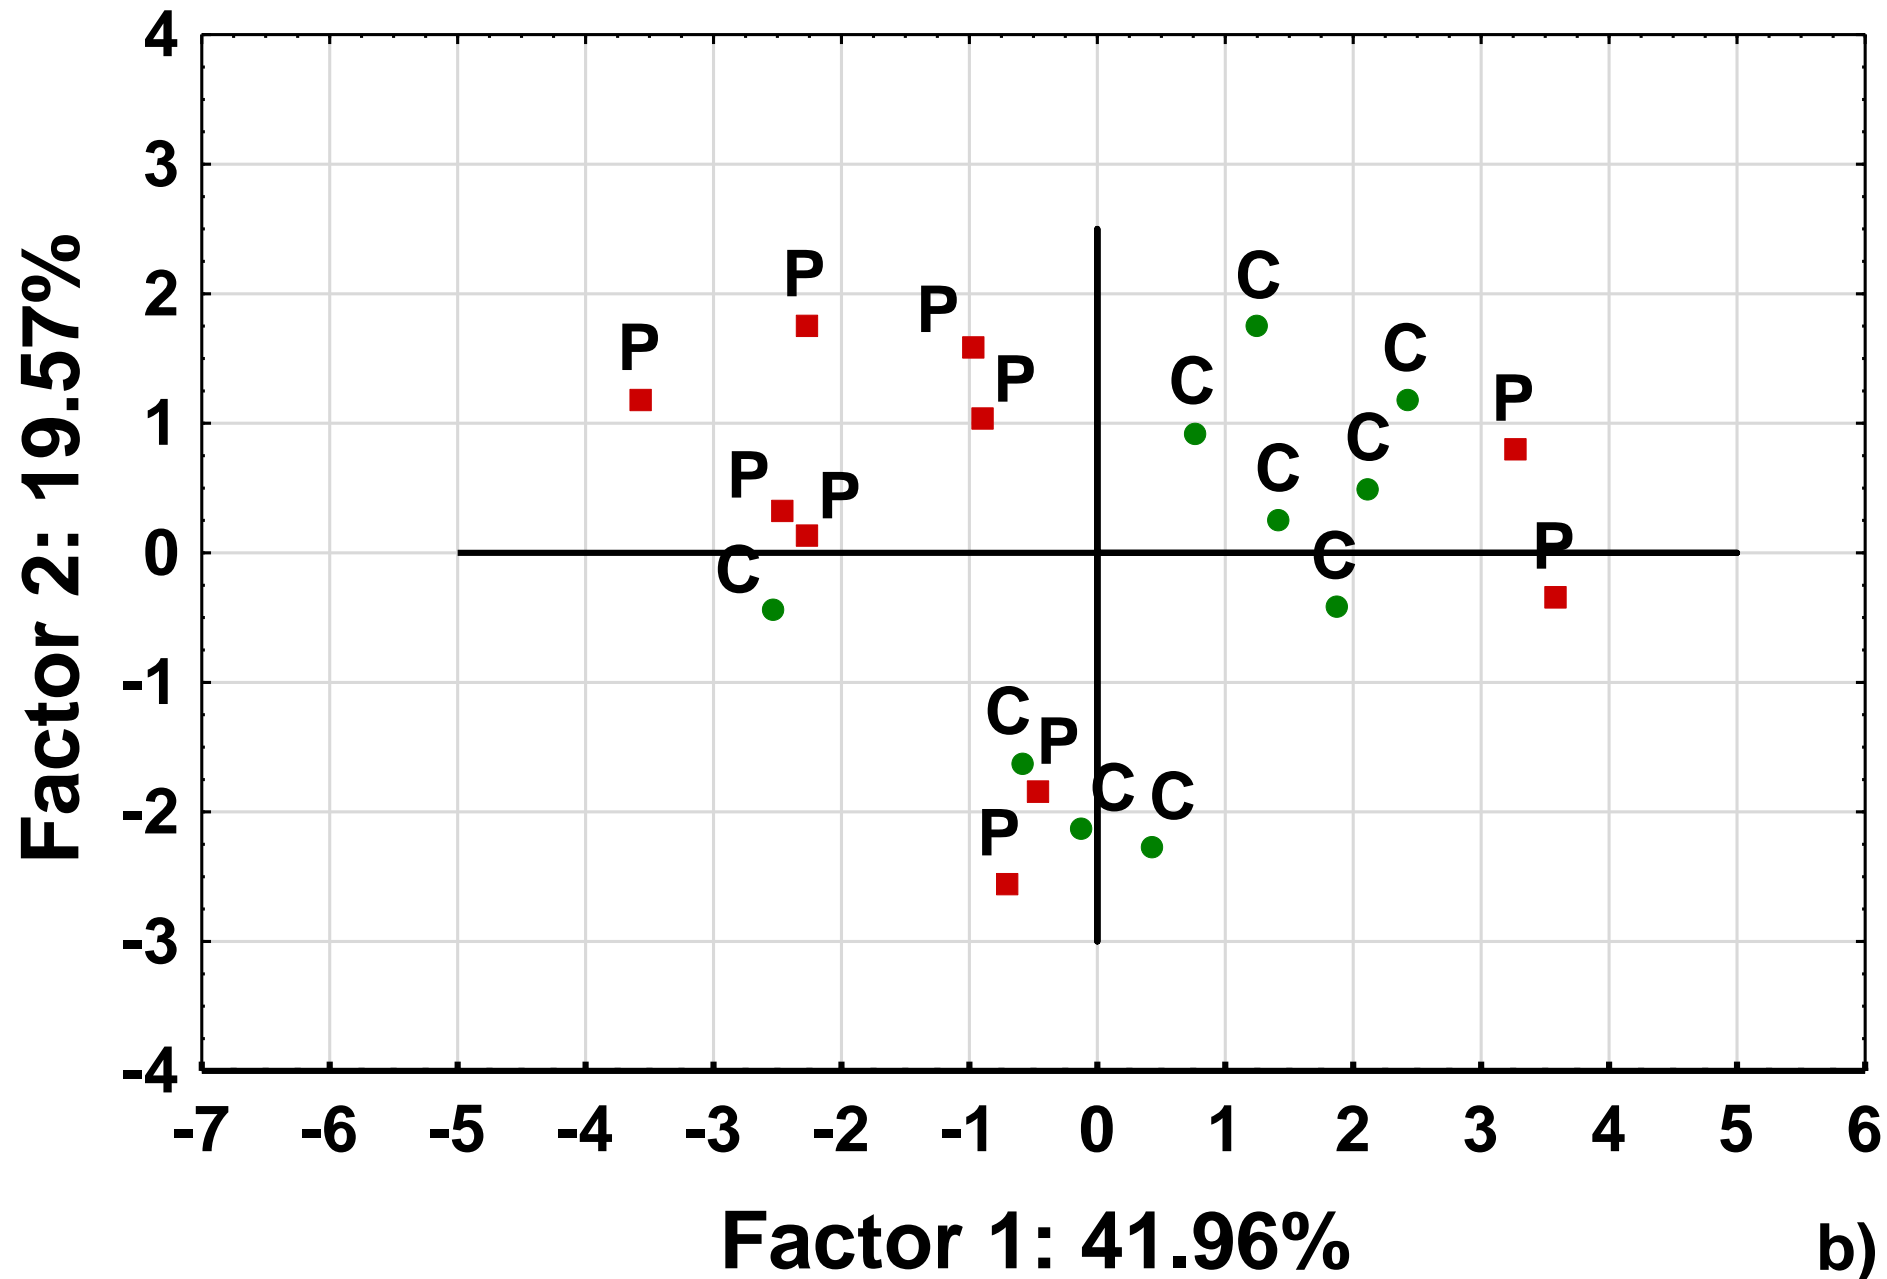

# Greenhouse / Sonata / Contans

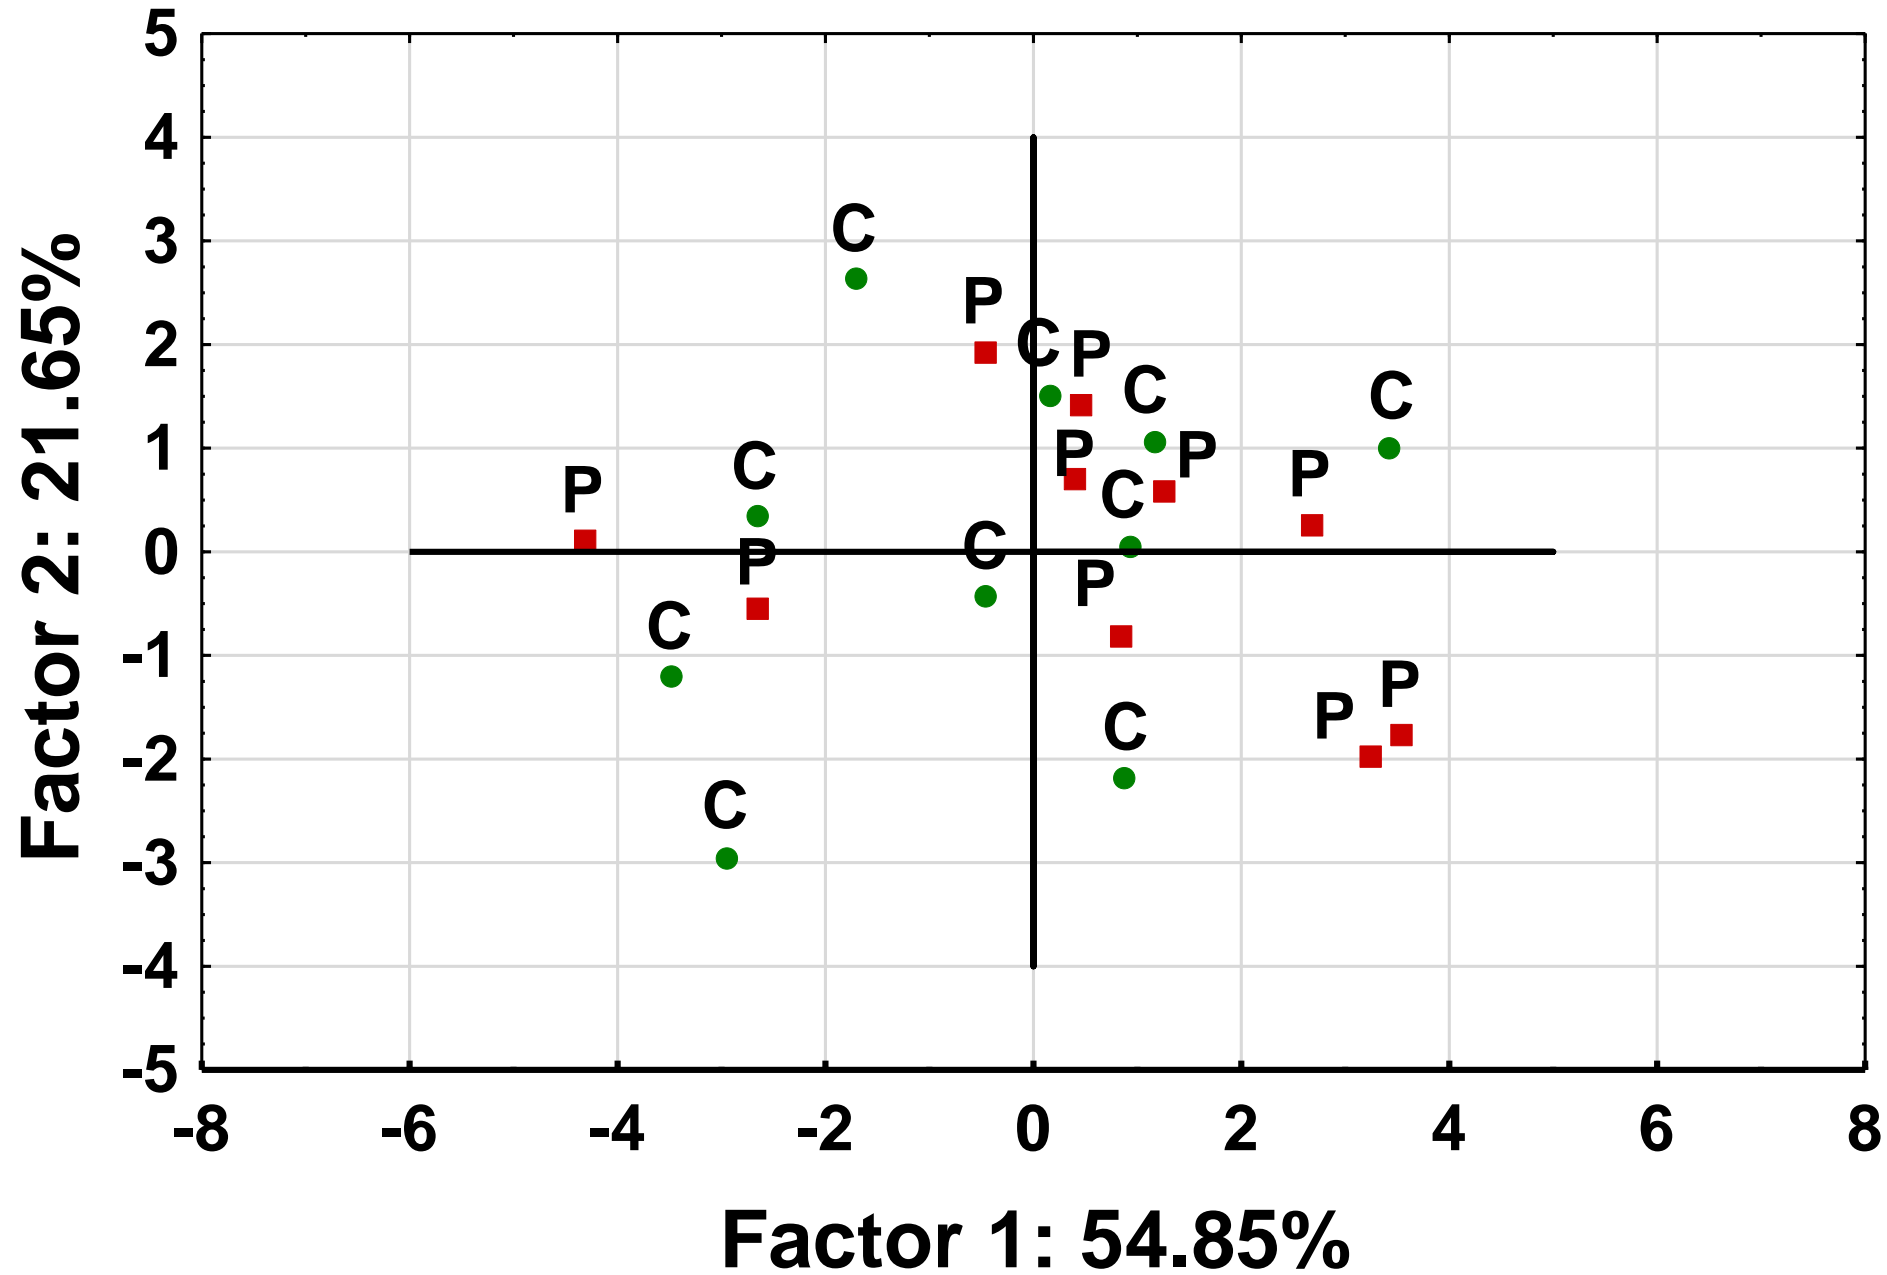

# Greenhouse / Sonata / Clonoplus

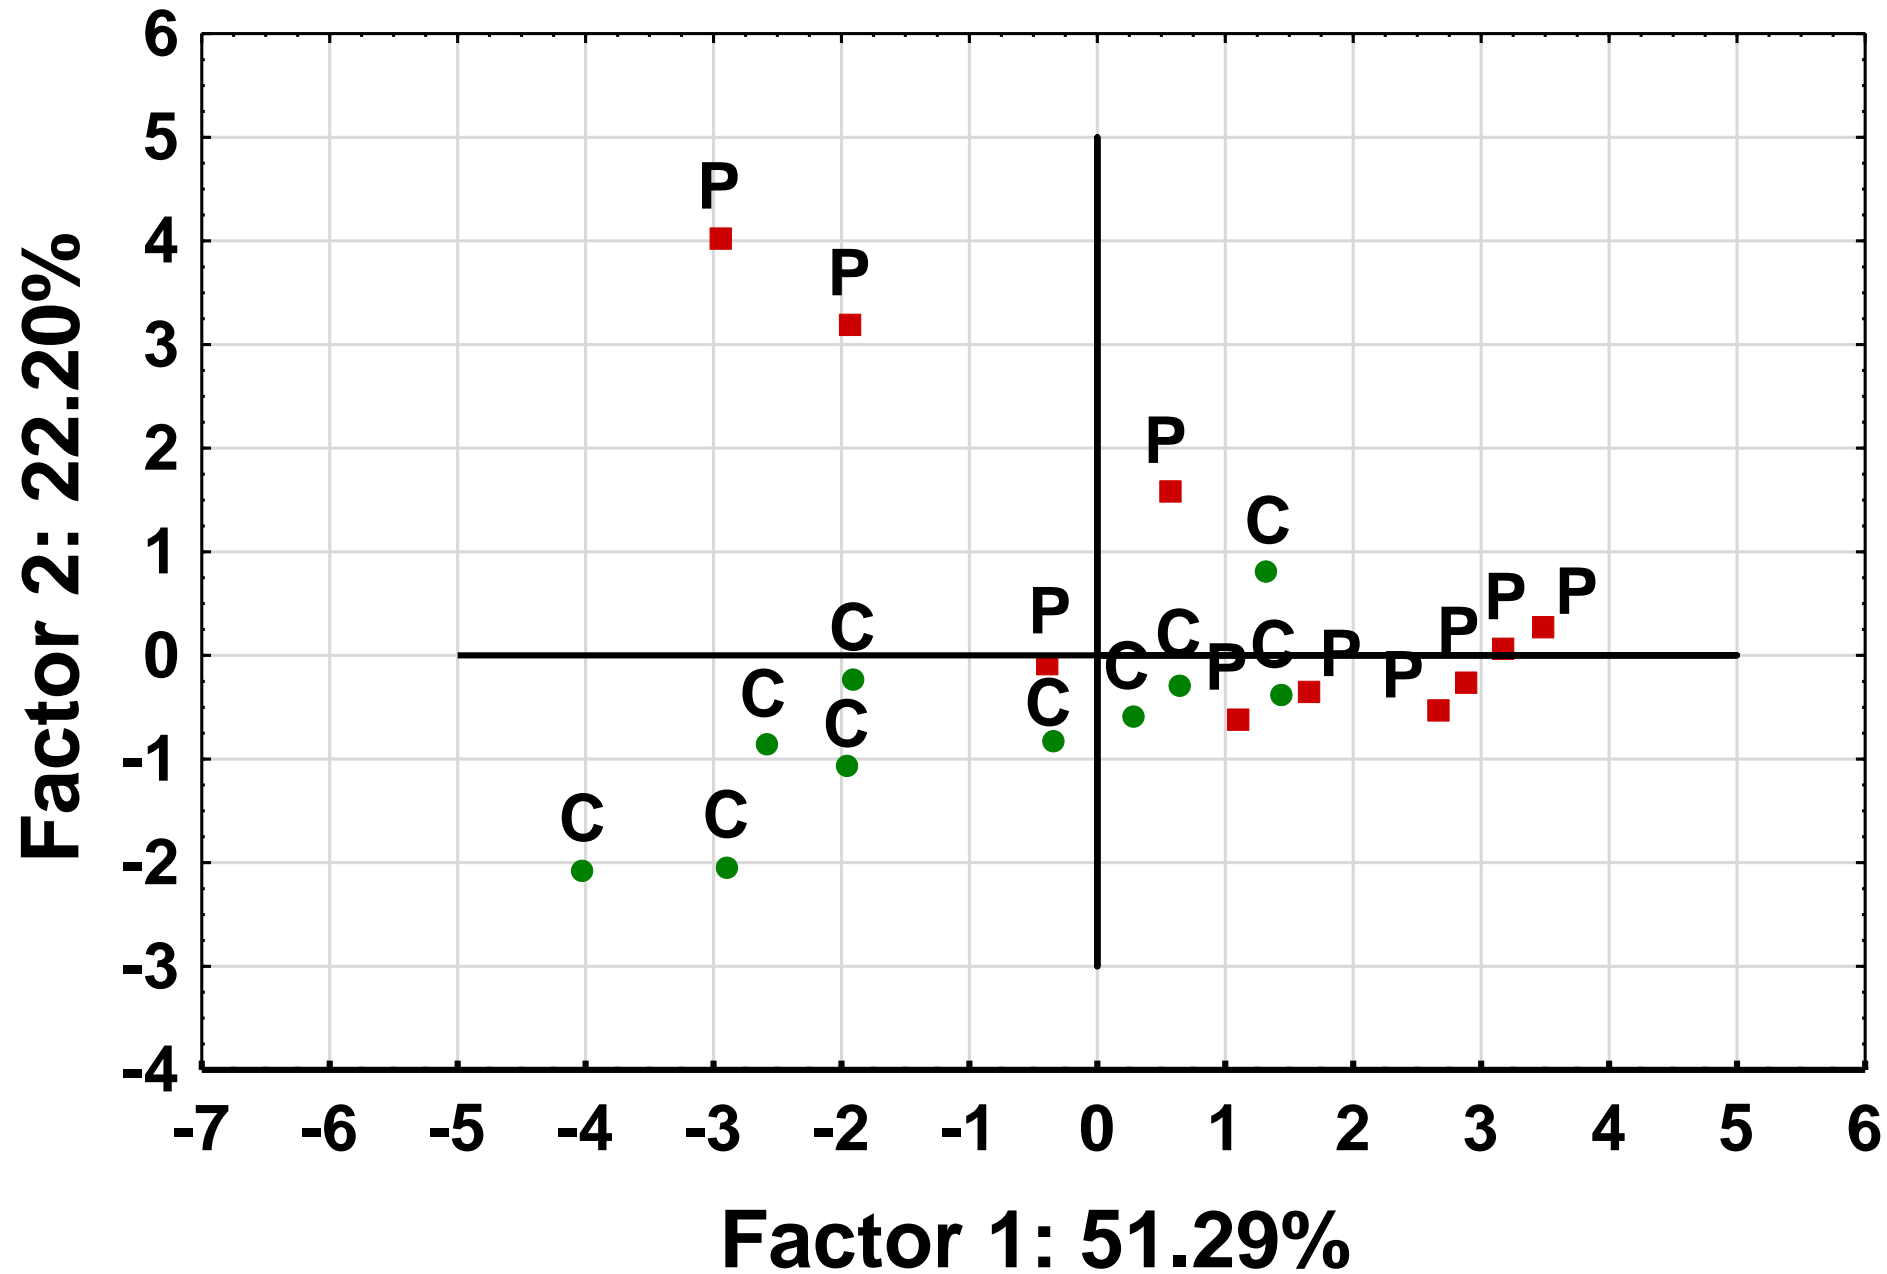

# Greenhouse / Sonata / Gliorex

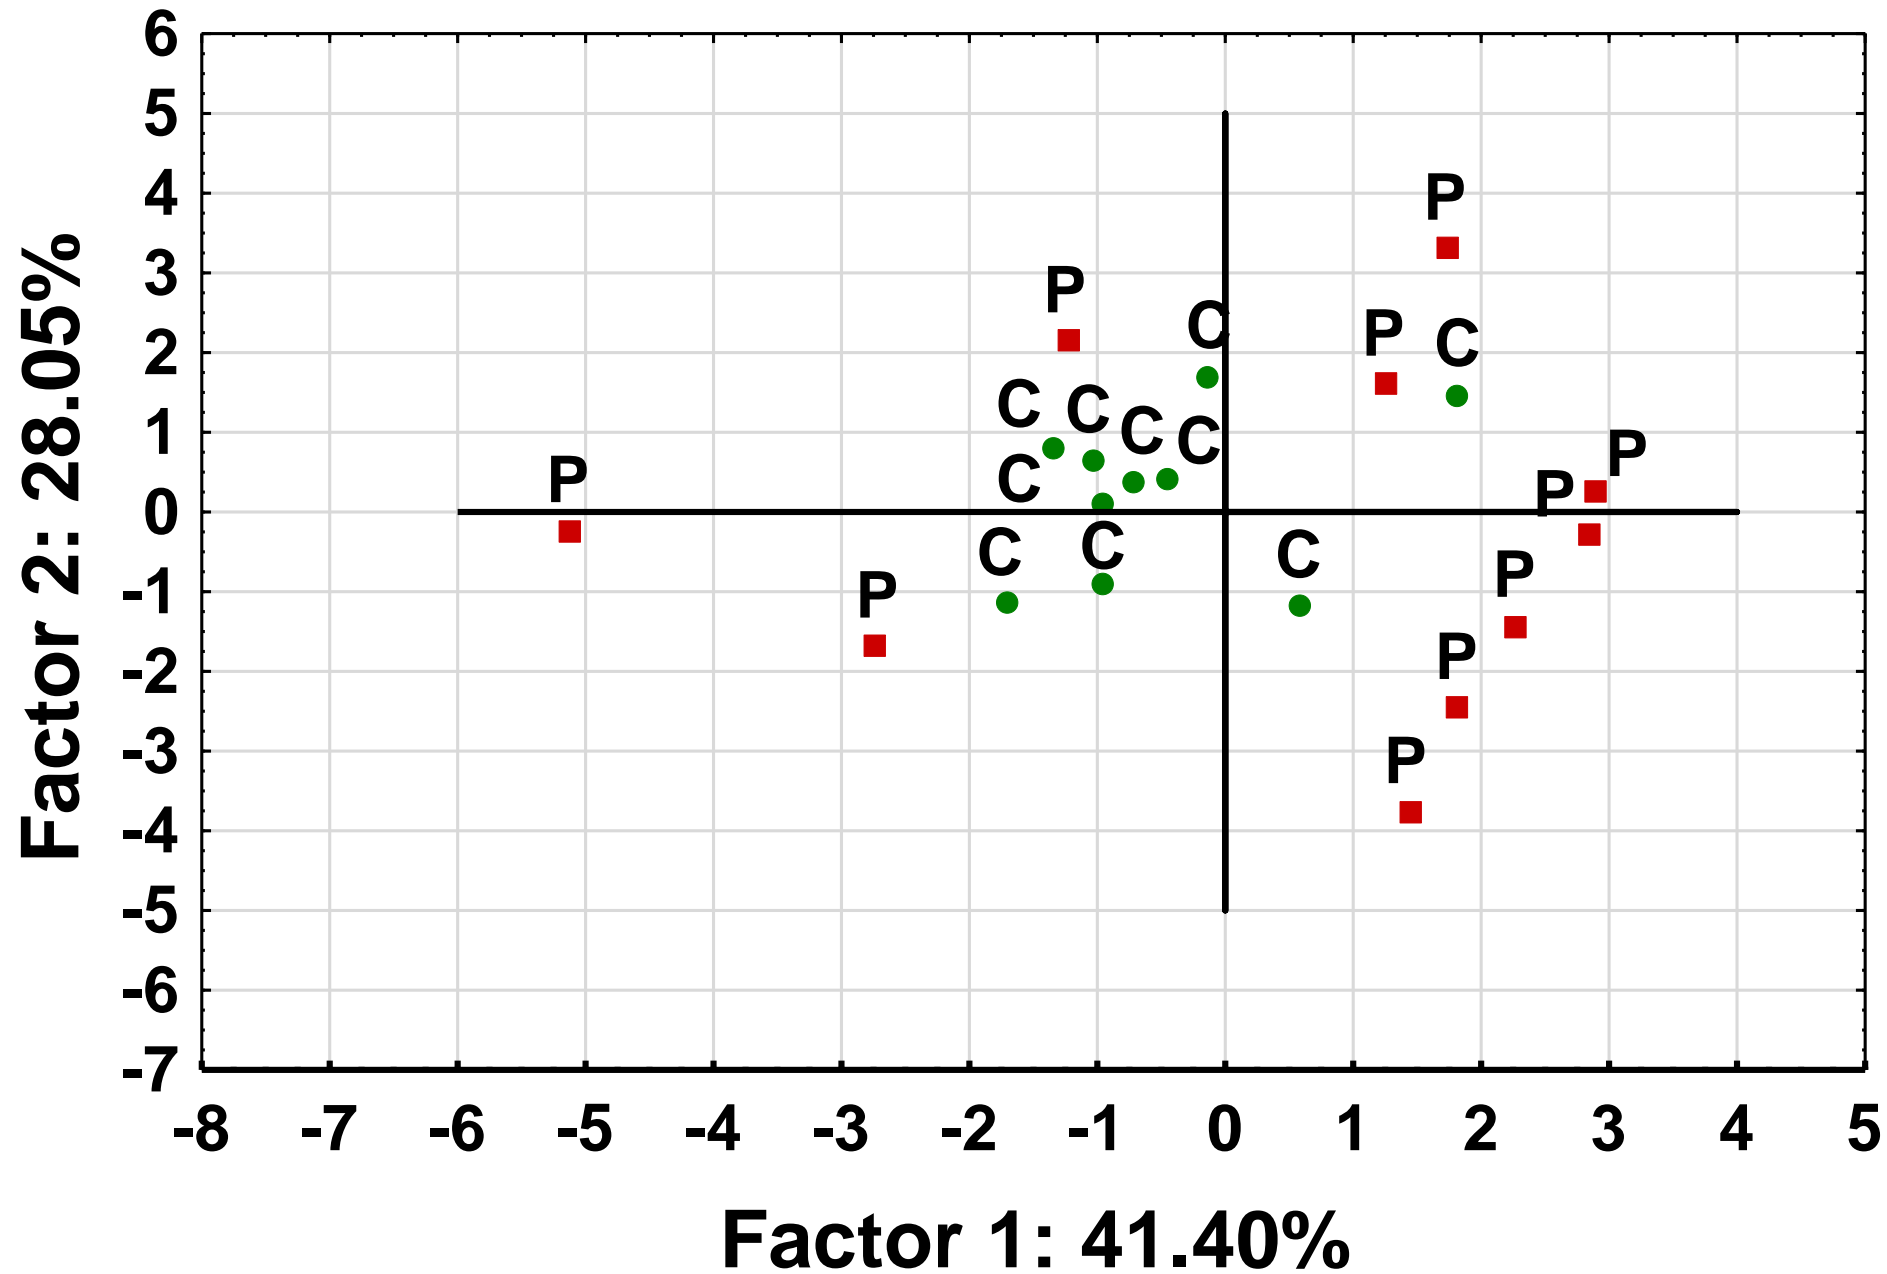

# Greenhouse / Sonata / Pseudomonas sp.

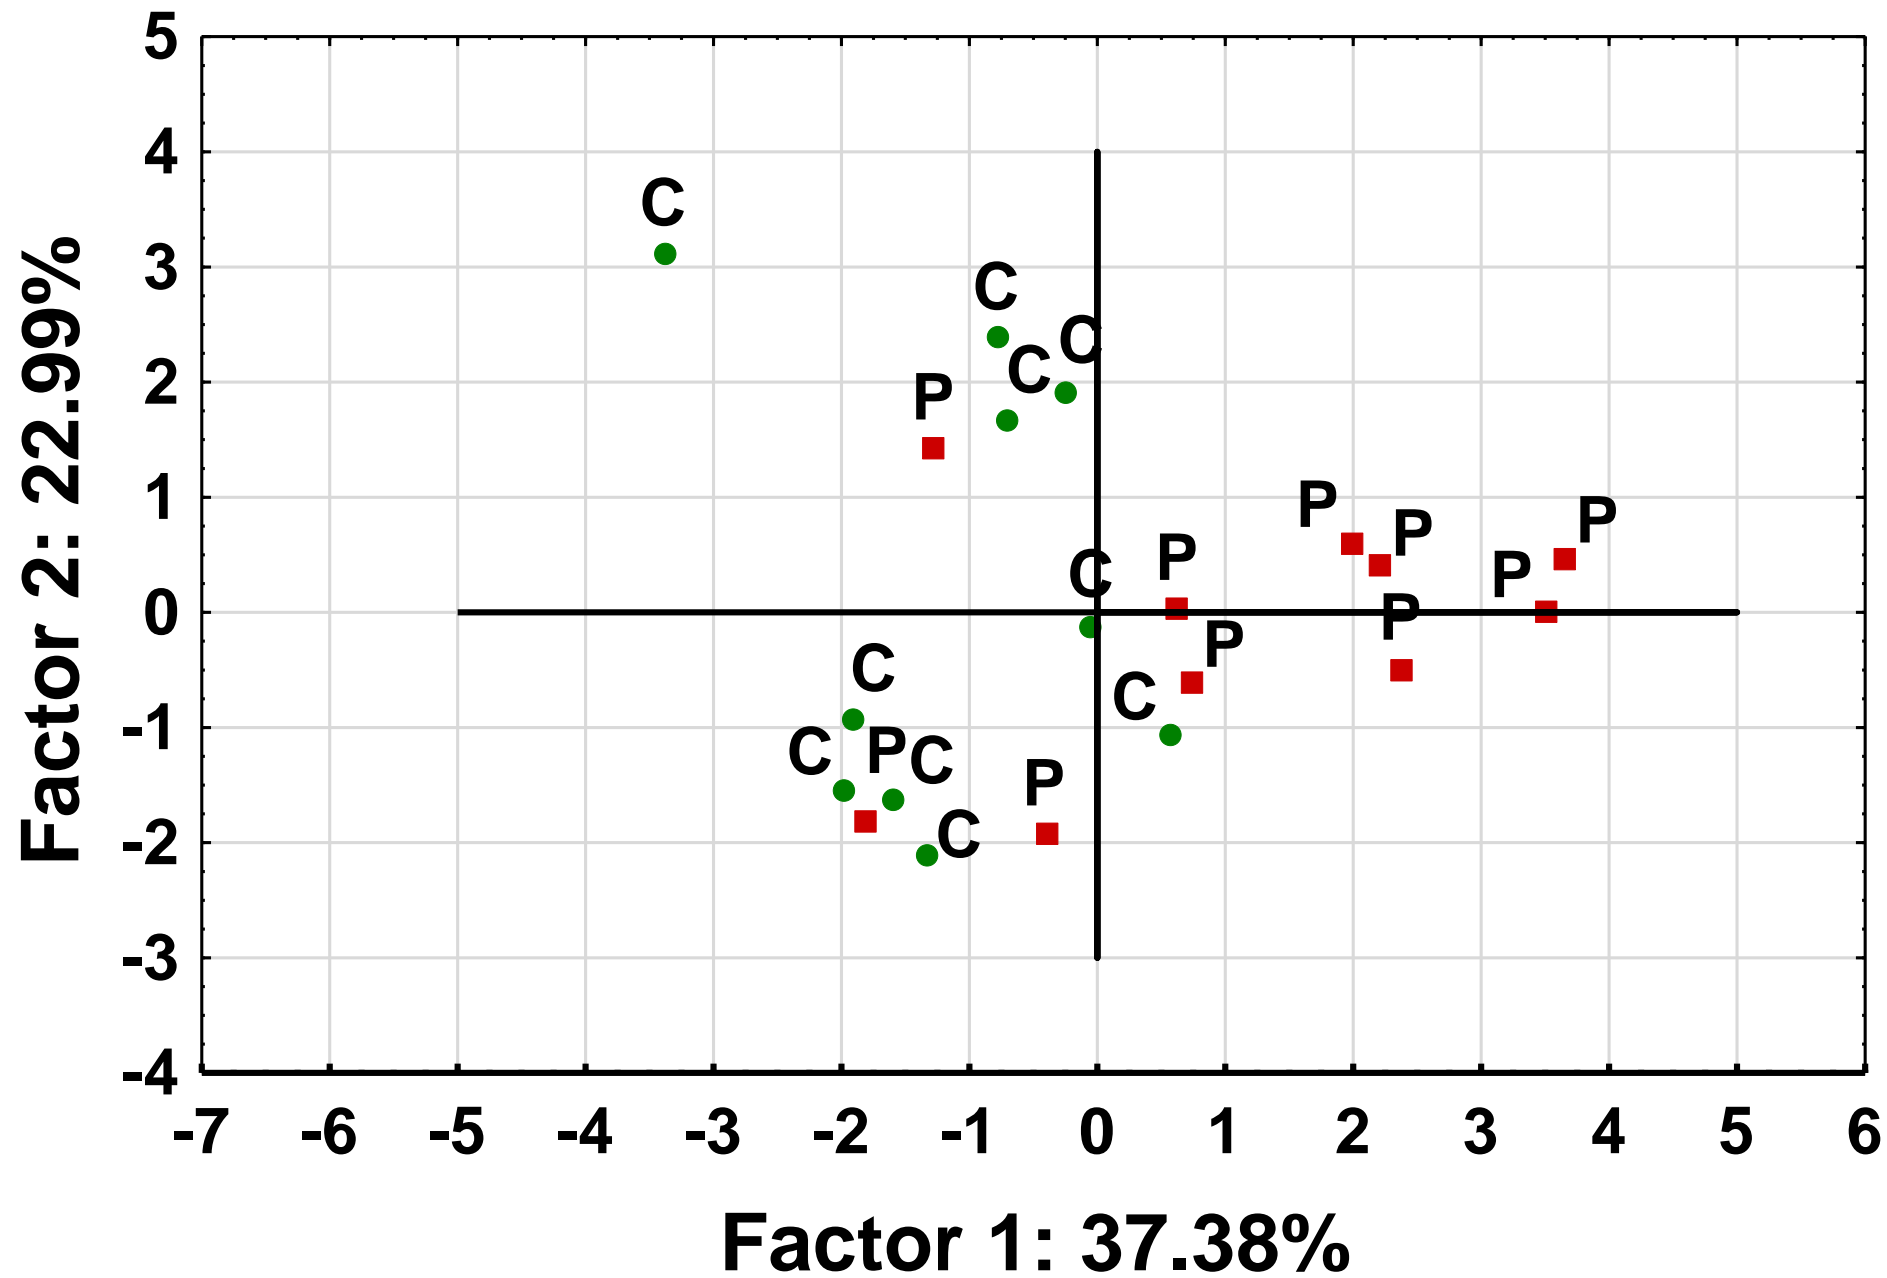

# Greenhouse / Sonata / Prometheus

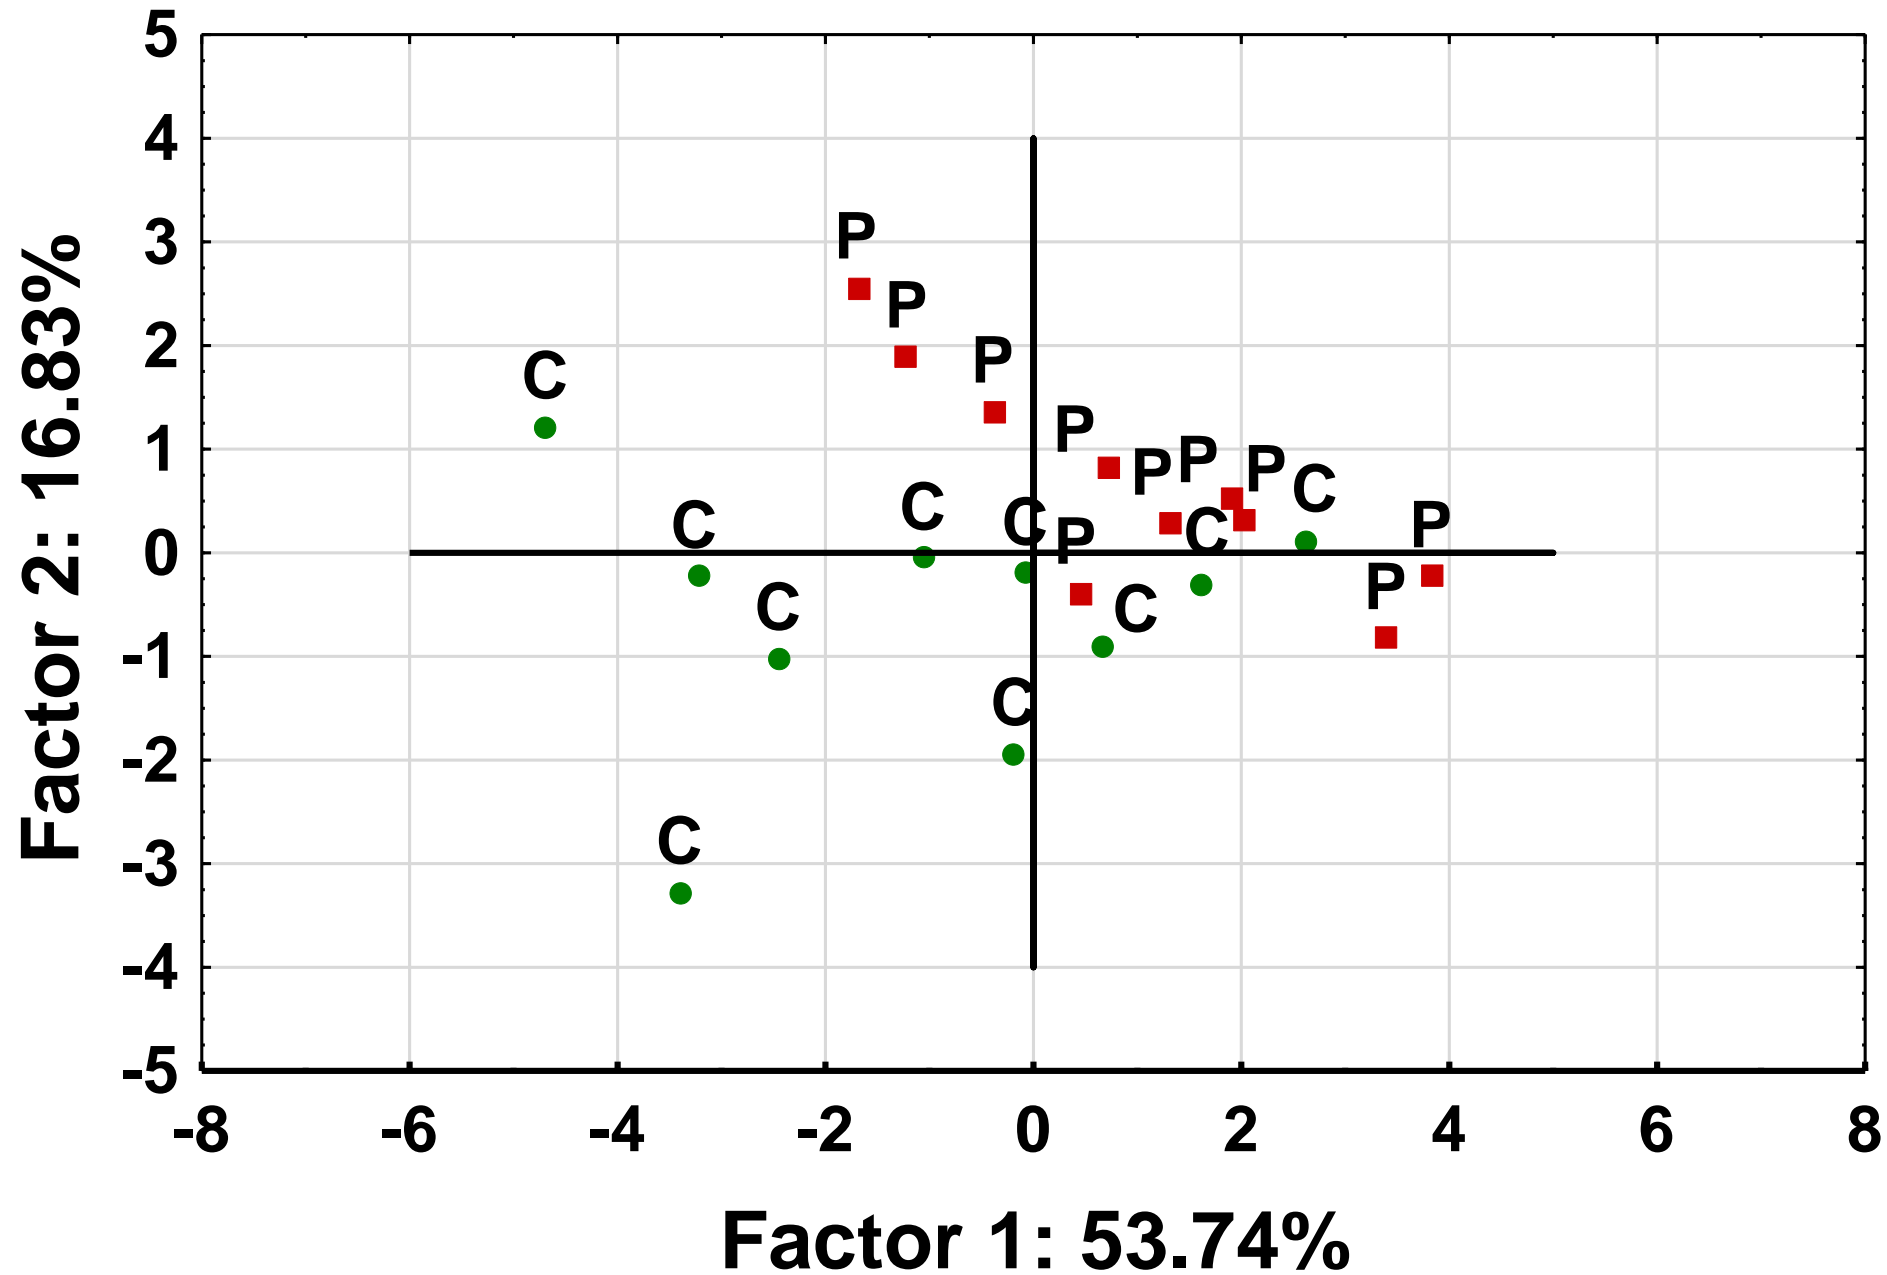

# Greenhouse / Sonata / Control

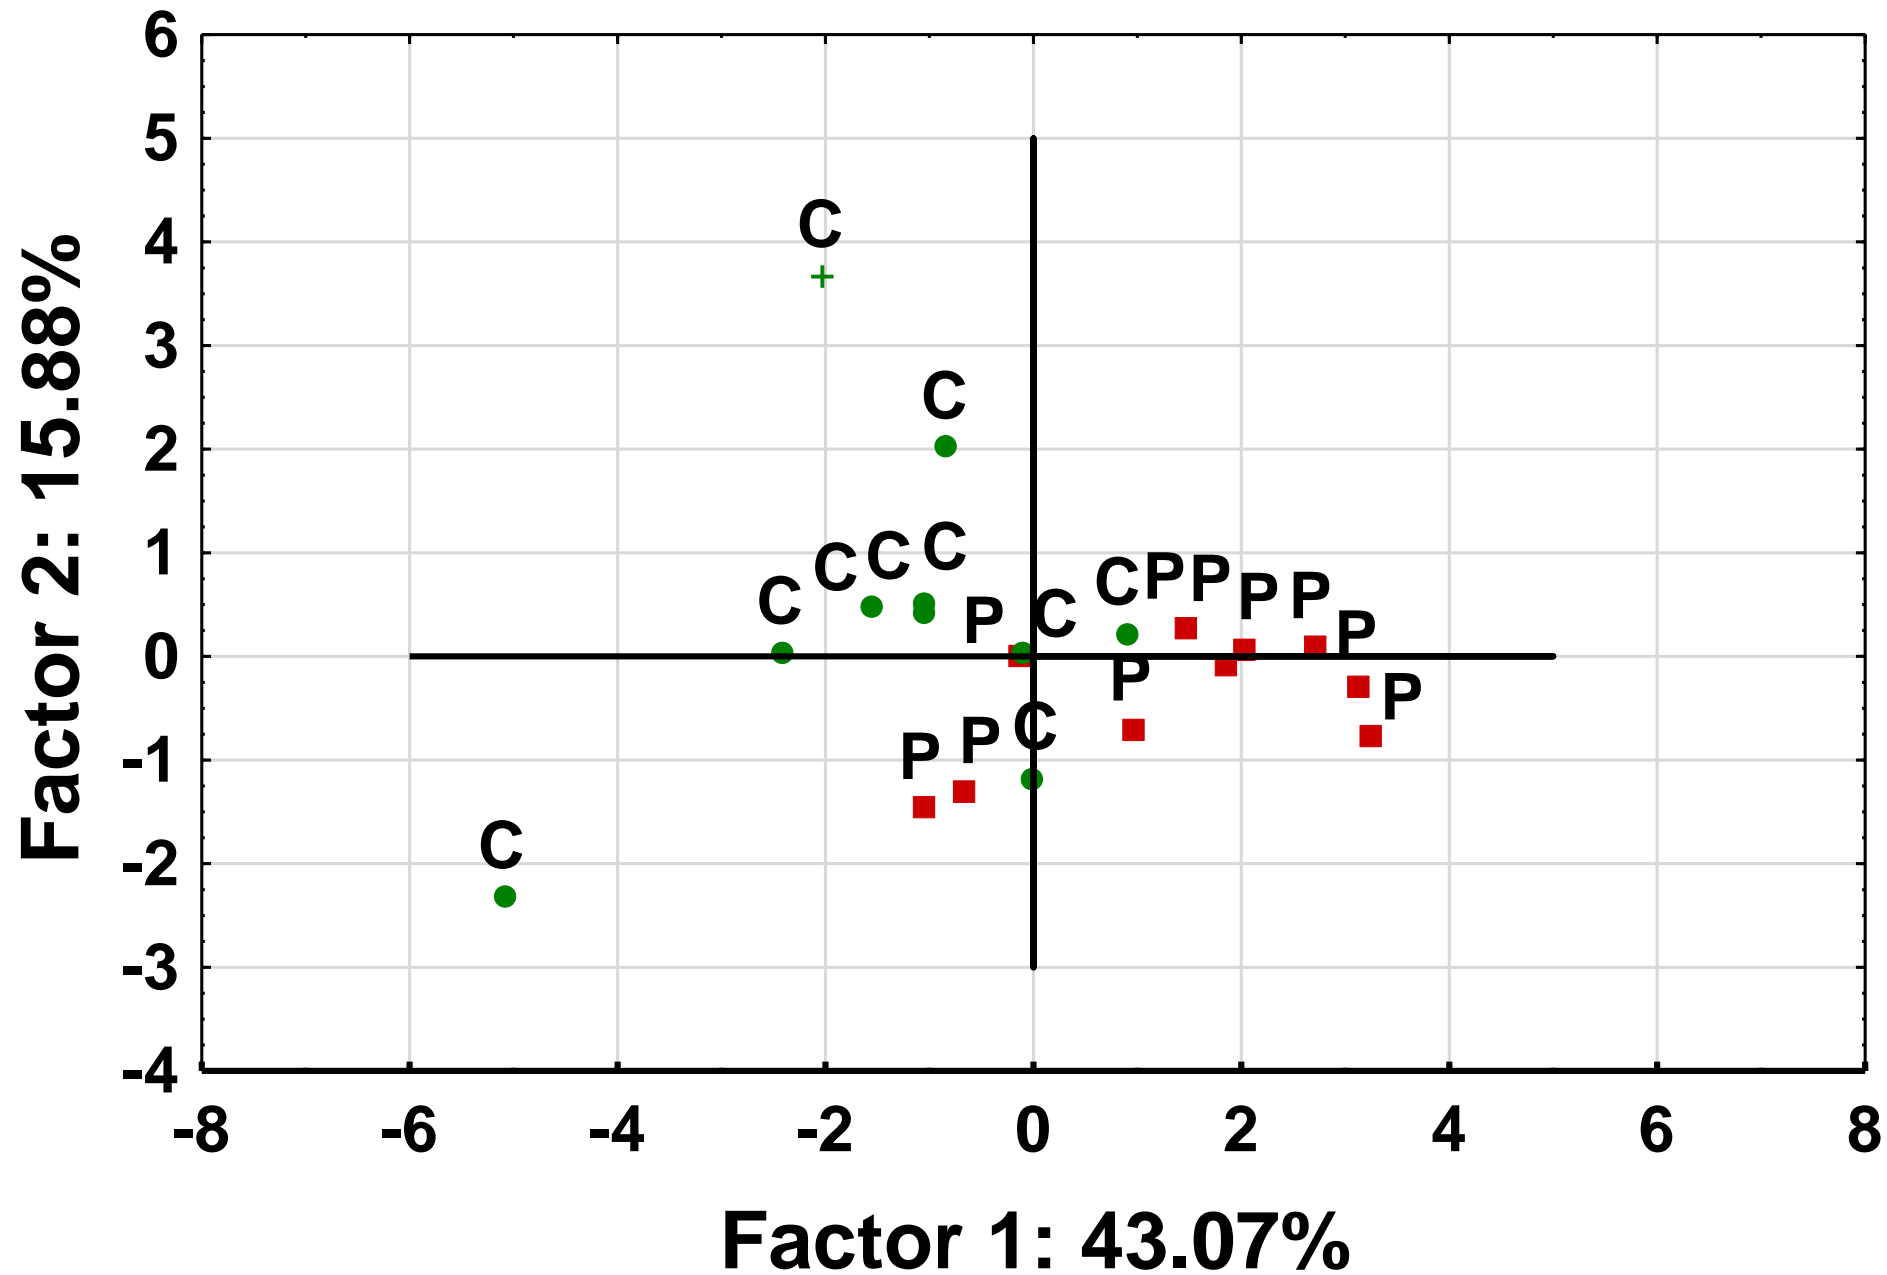

# Greenhouse / Wendy / Contans

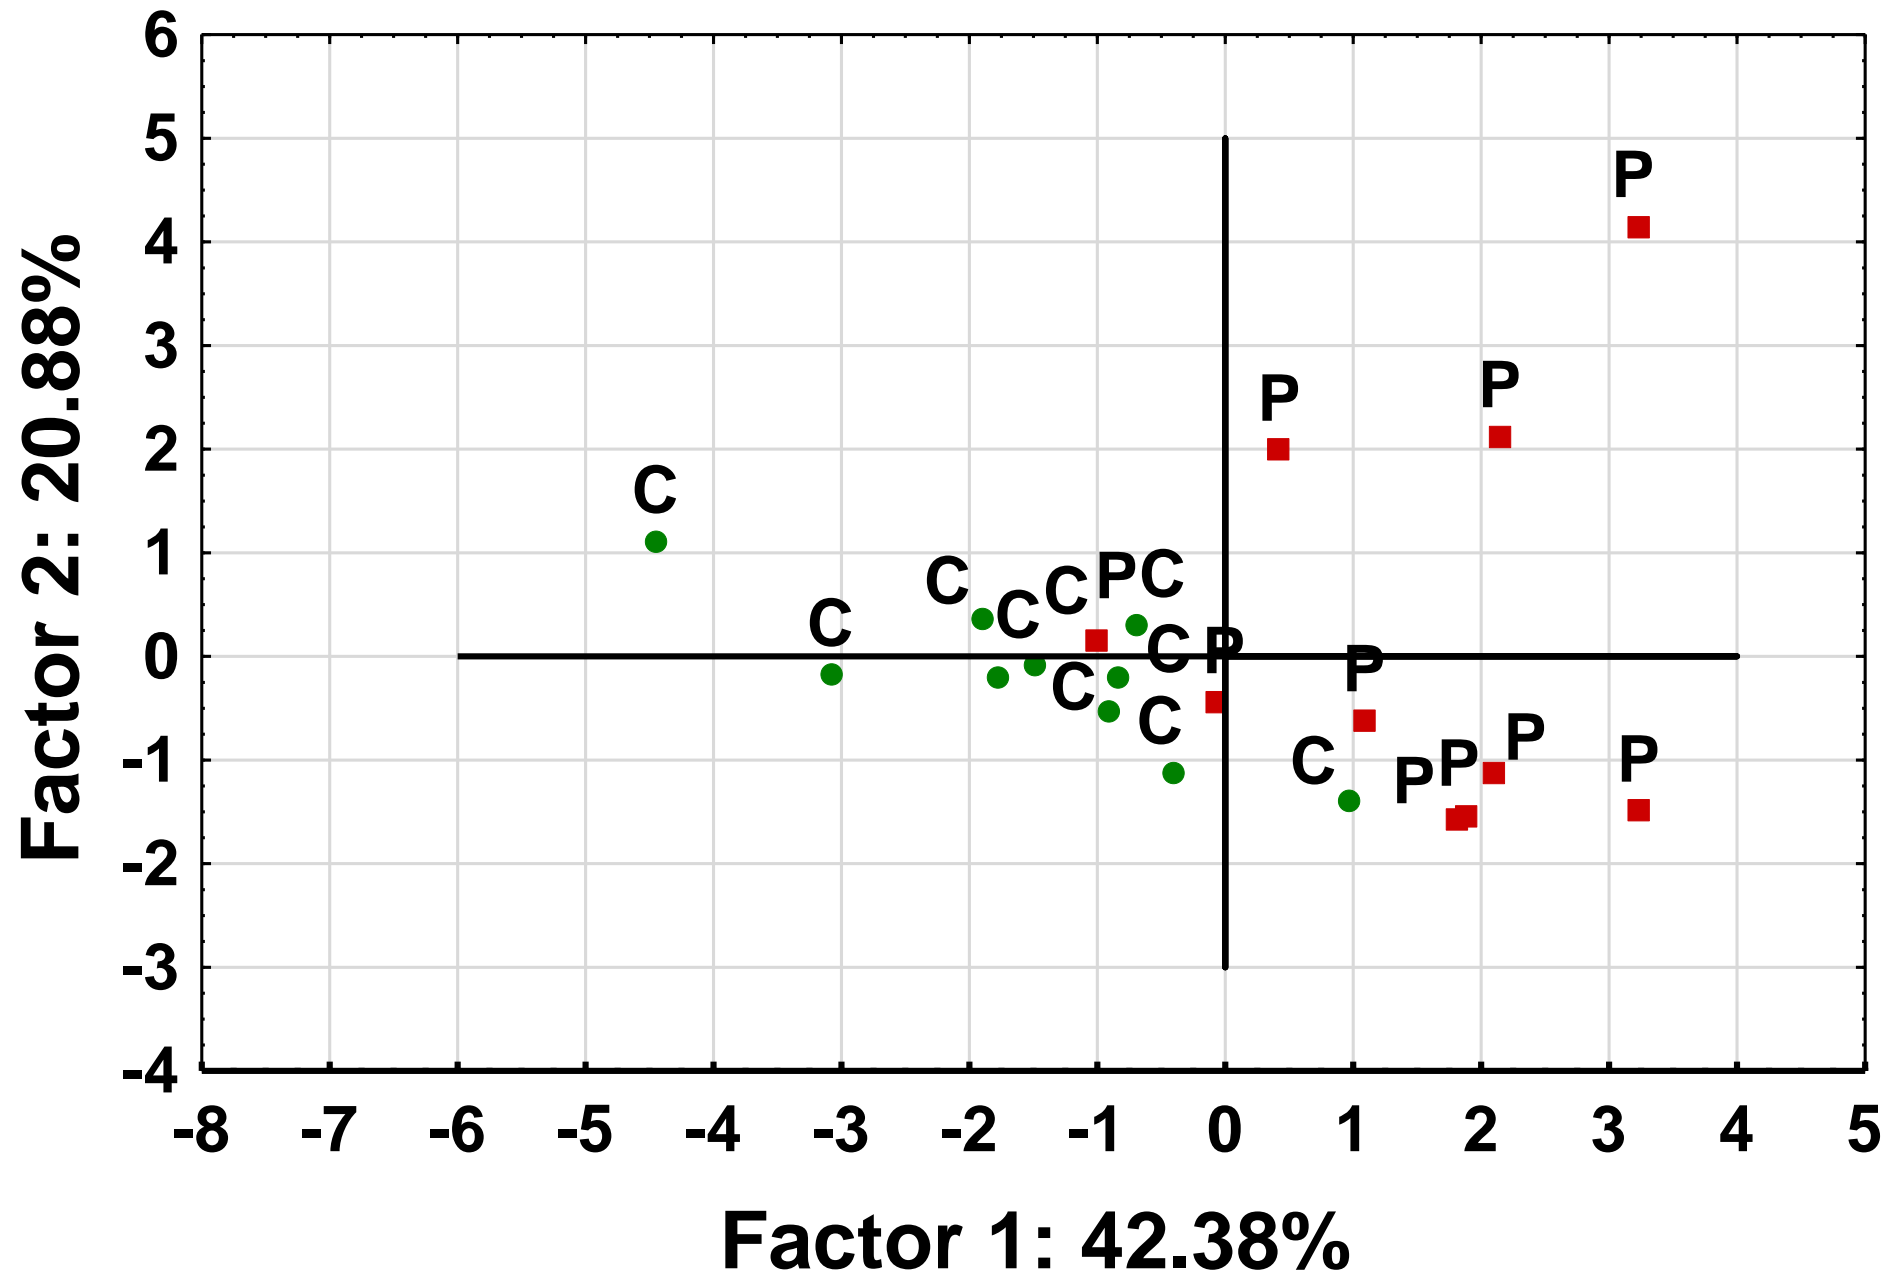

# Greenhouse / Wendy / Integral Pro

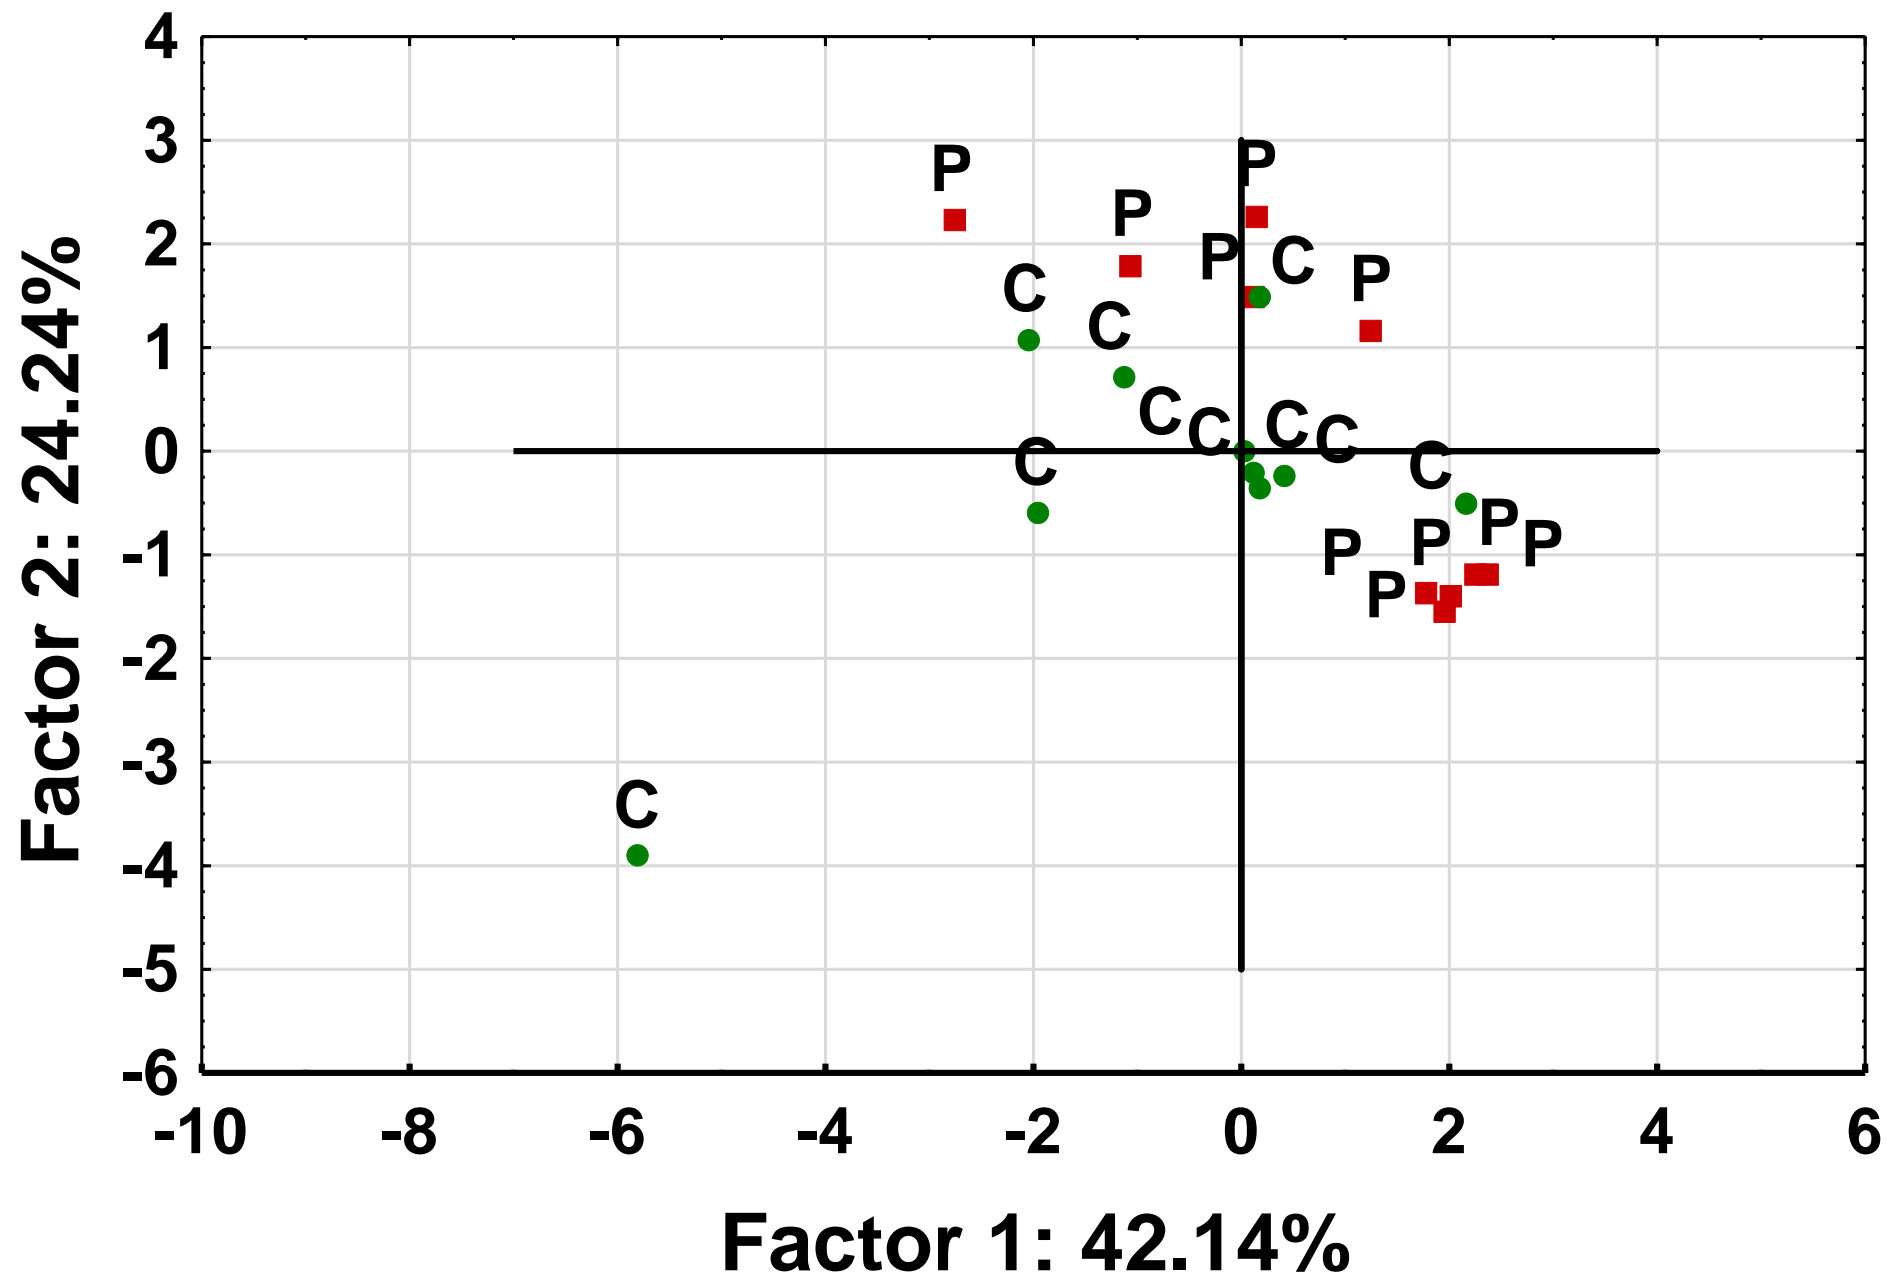

# Cultivating room / Wendy / Polyversum

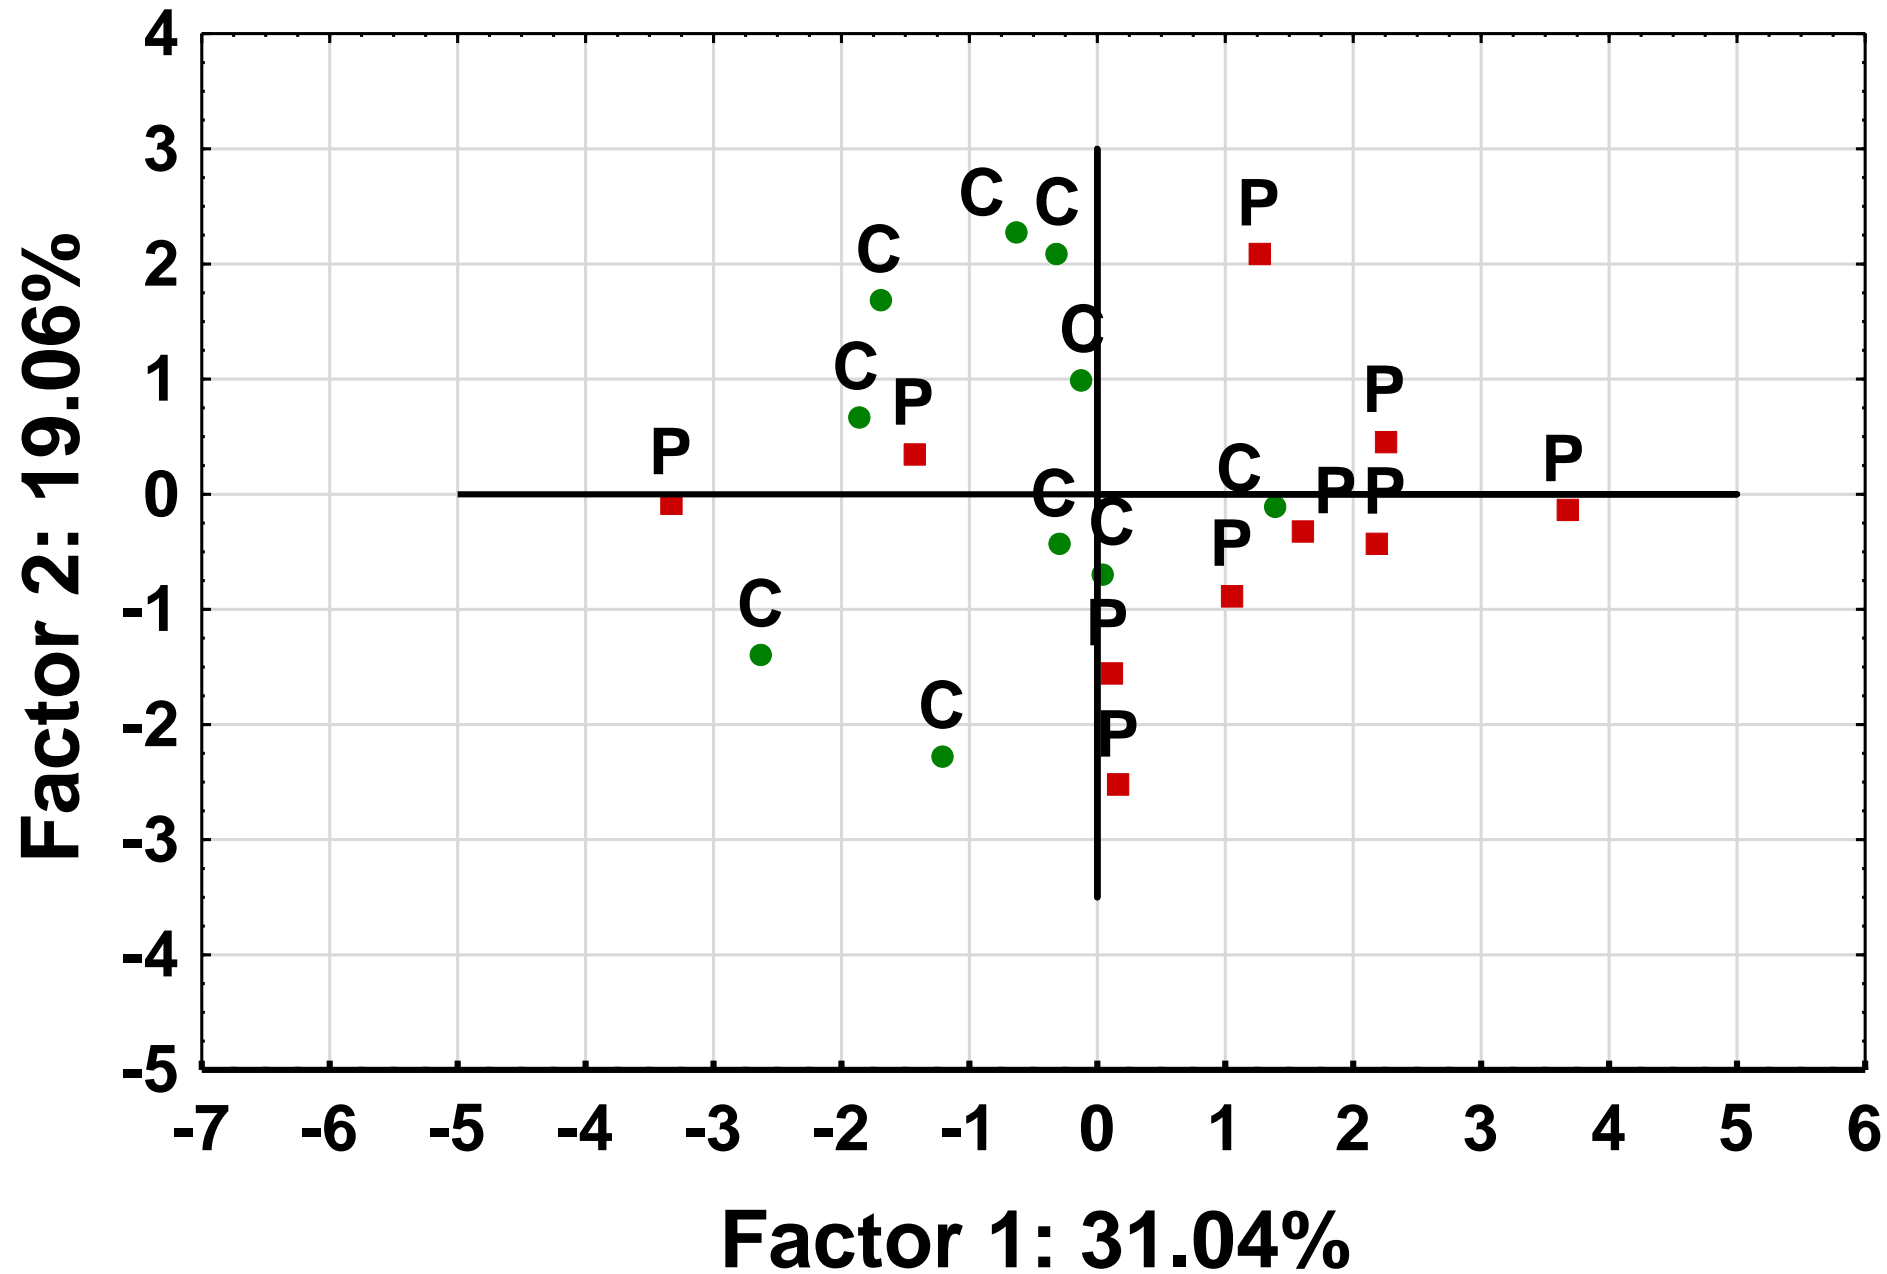

# Greenhouse / Wendy / Pseudomonas sp.

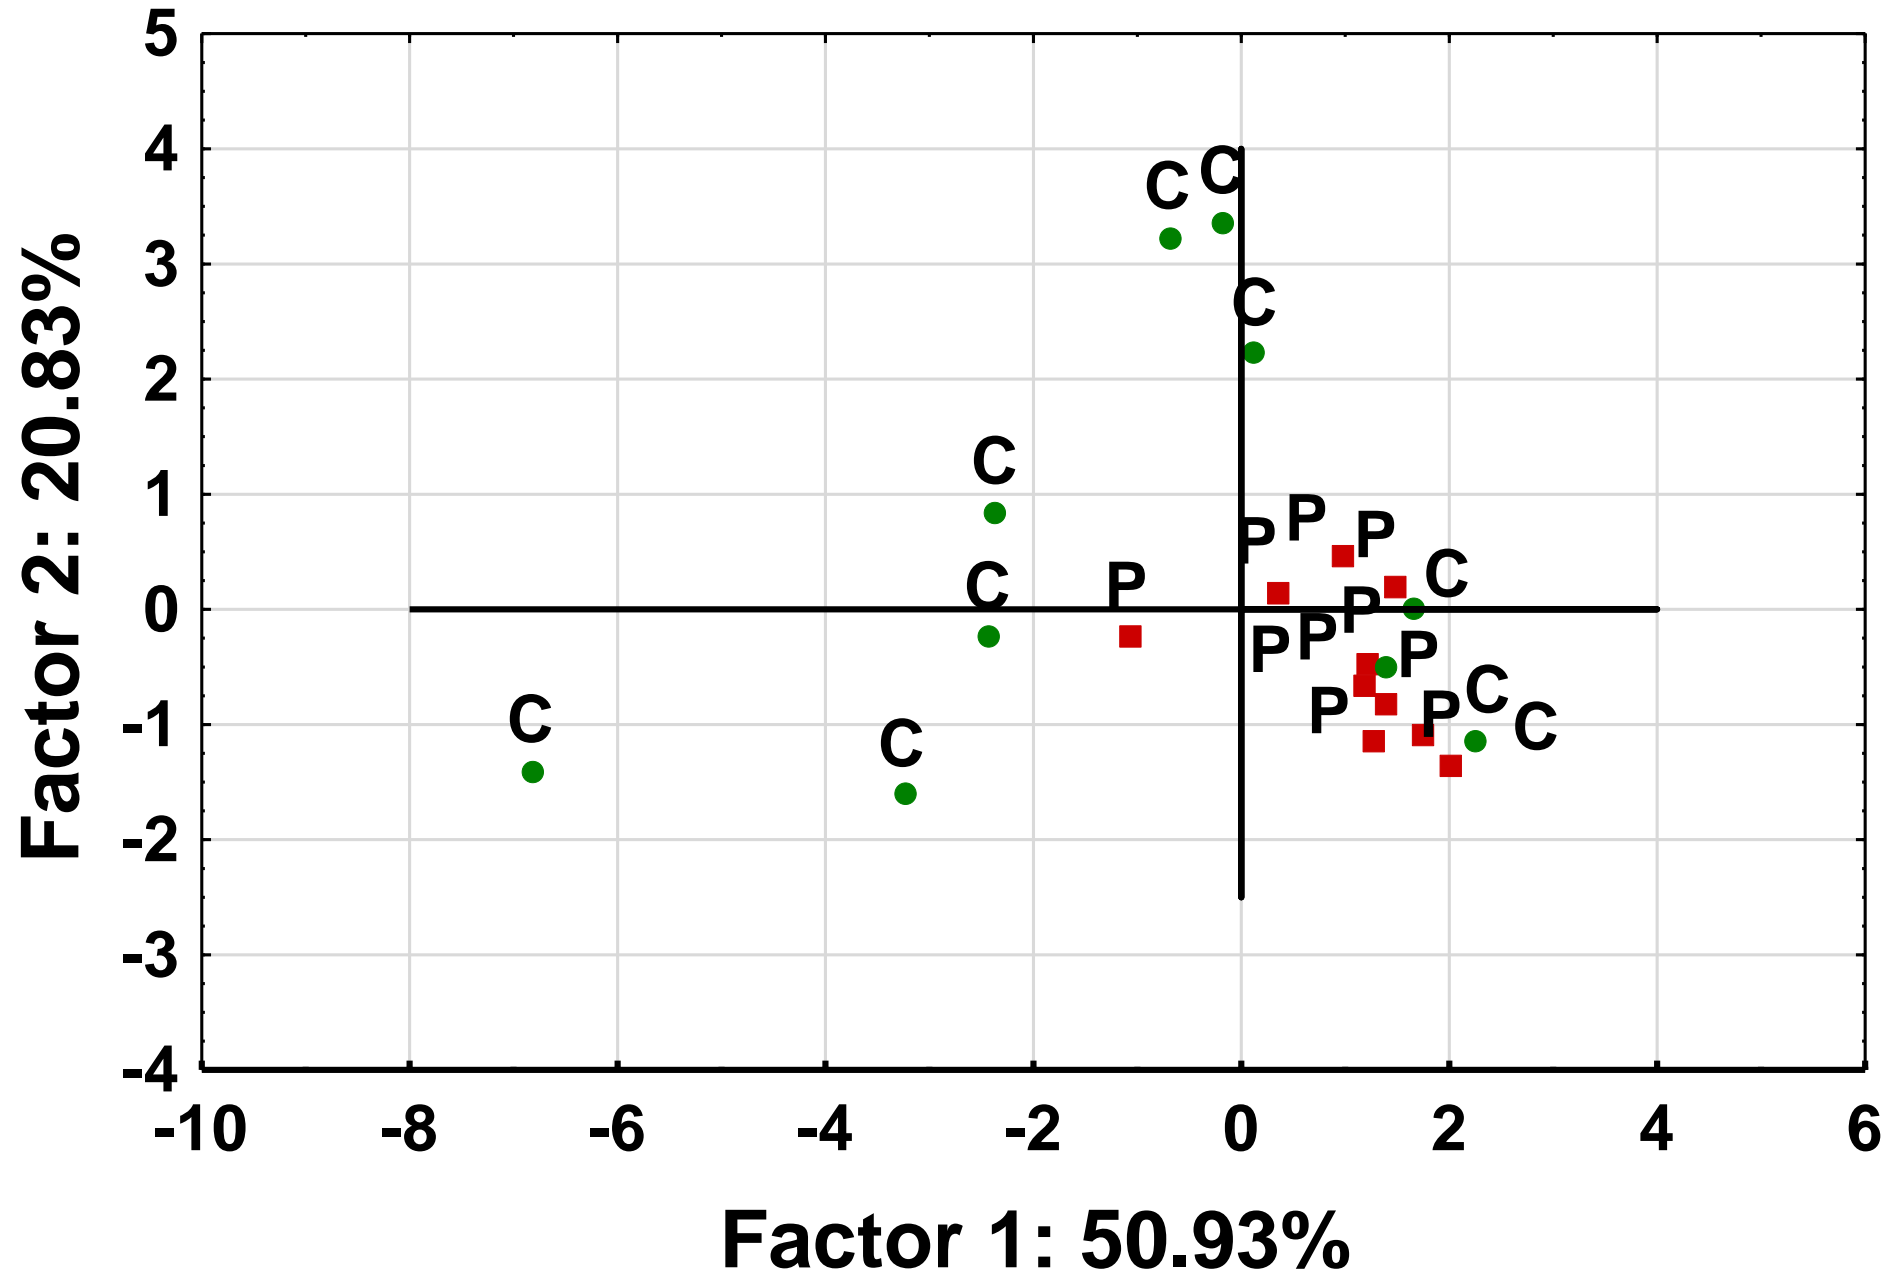

## Greenhouse / Wendy / Control

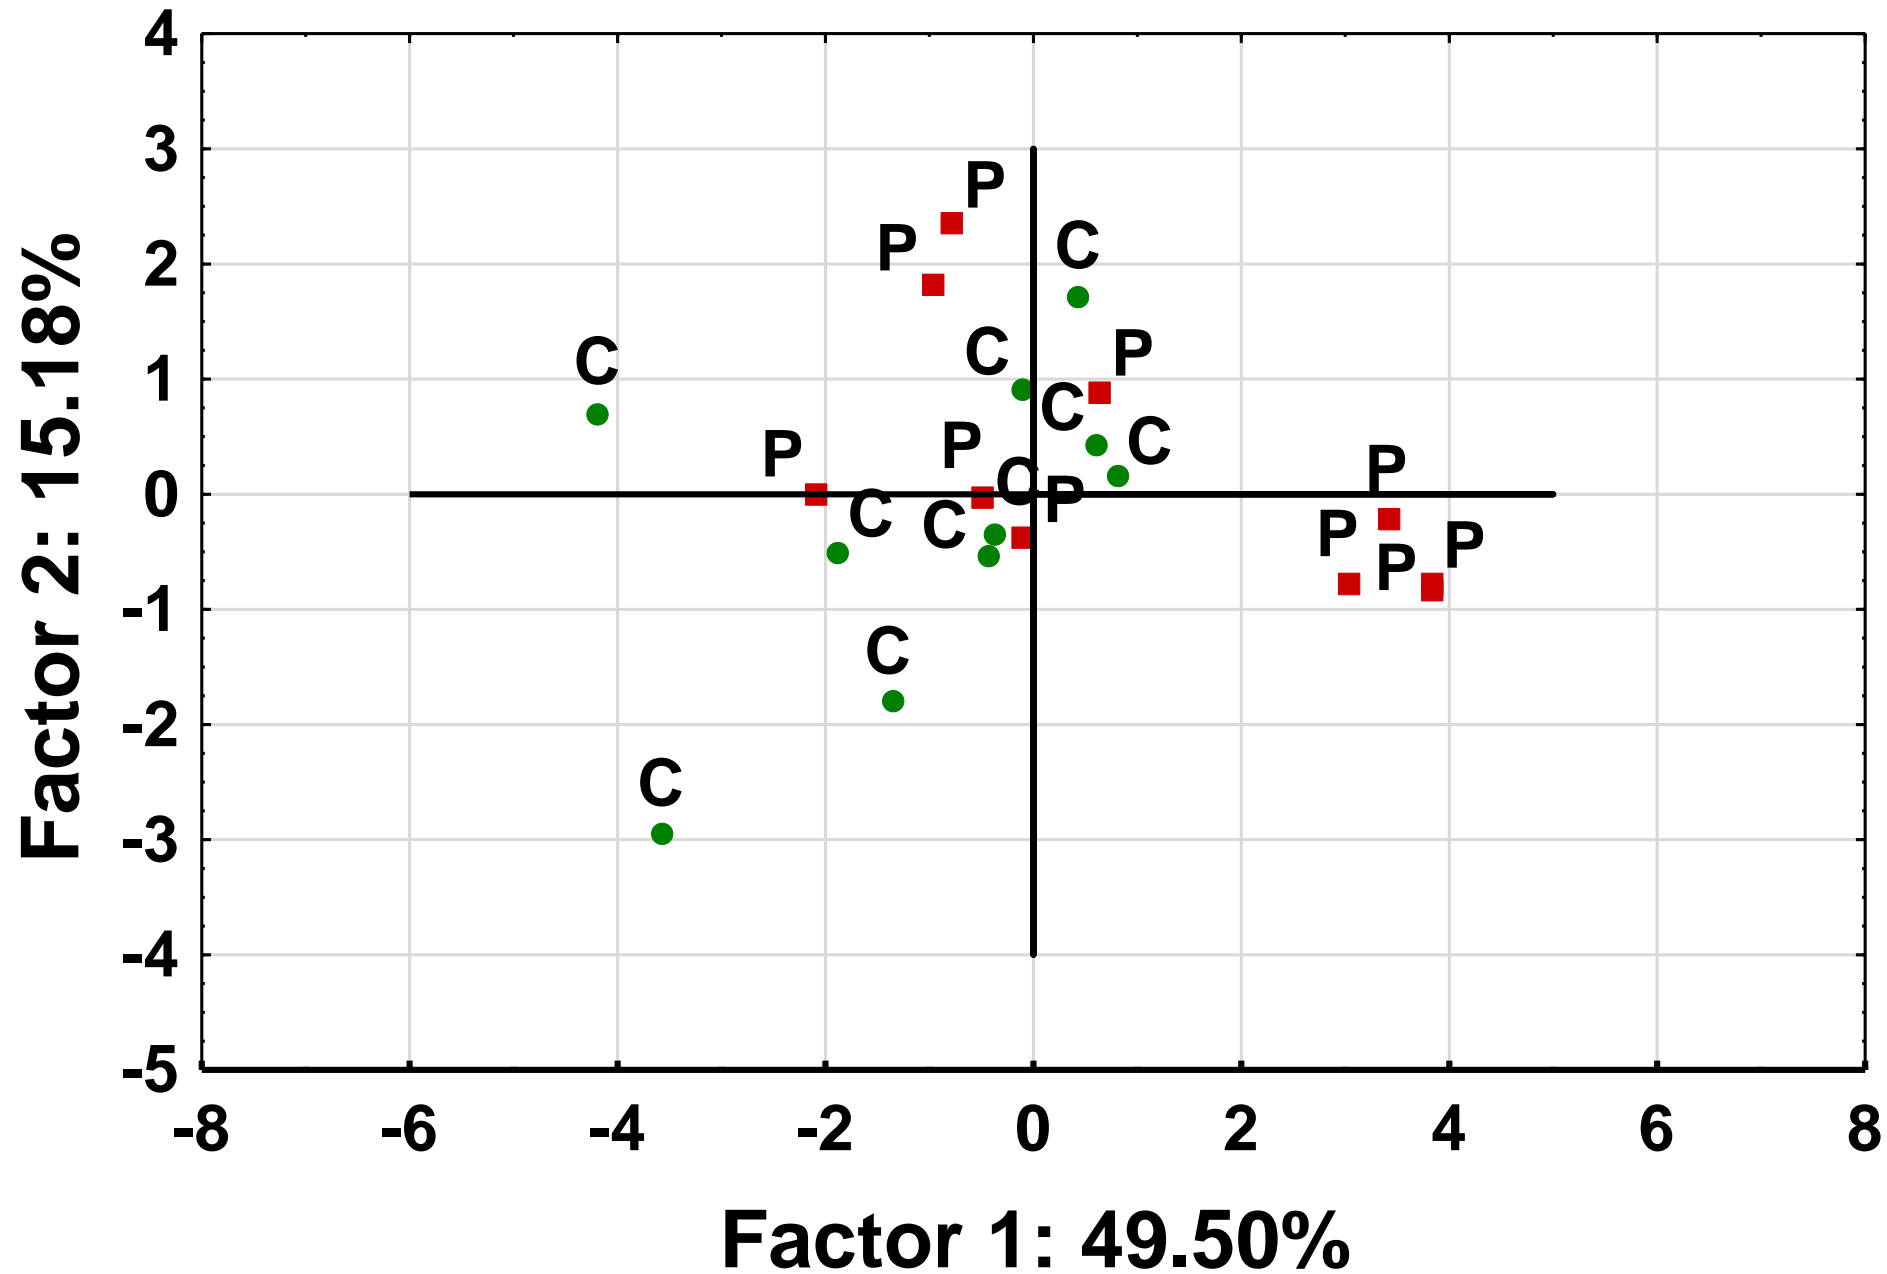

# Greenhouse / Wendy / Gliorex

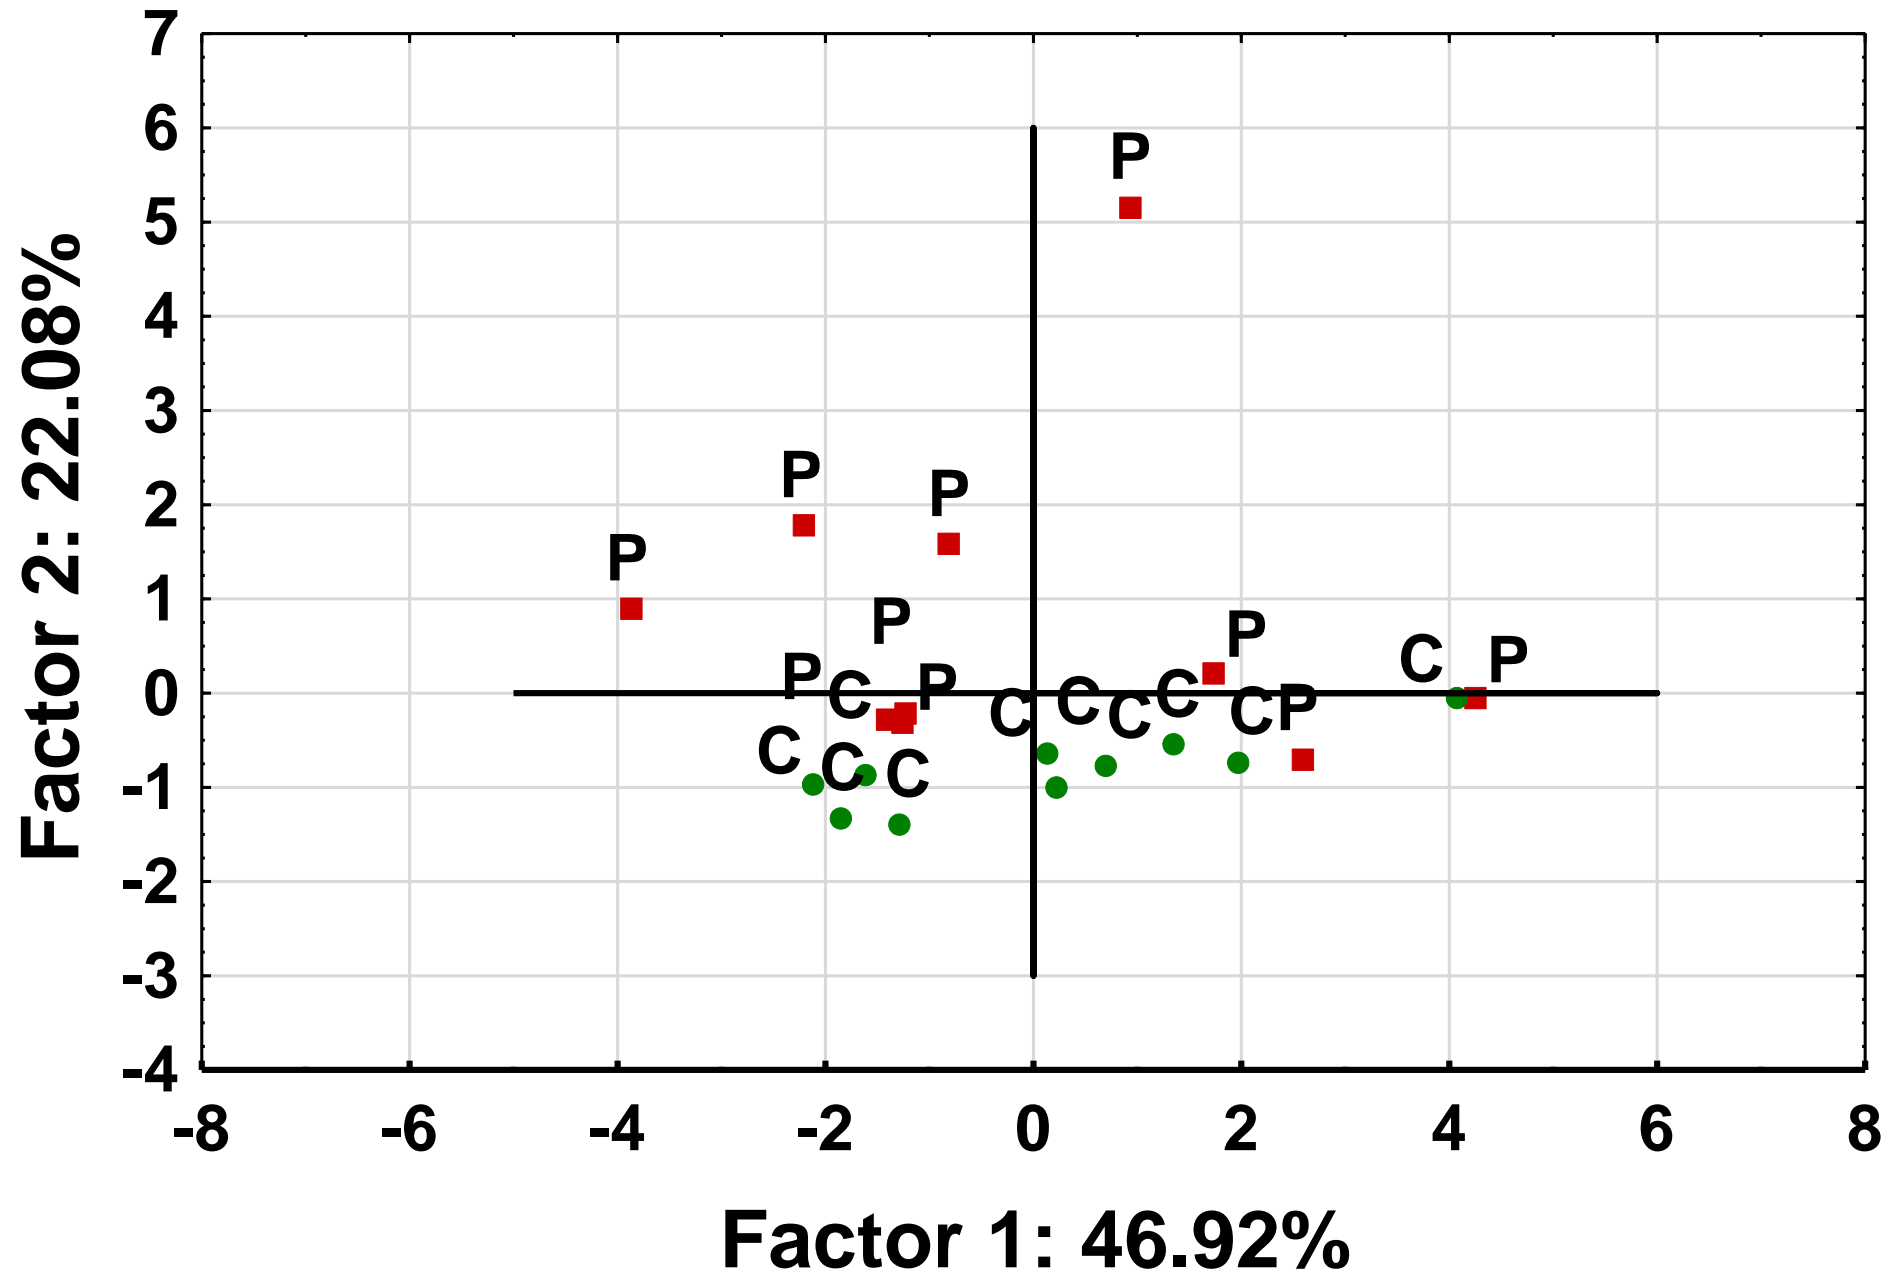

# Greenhouse / Wendy / Xilon

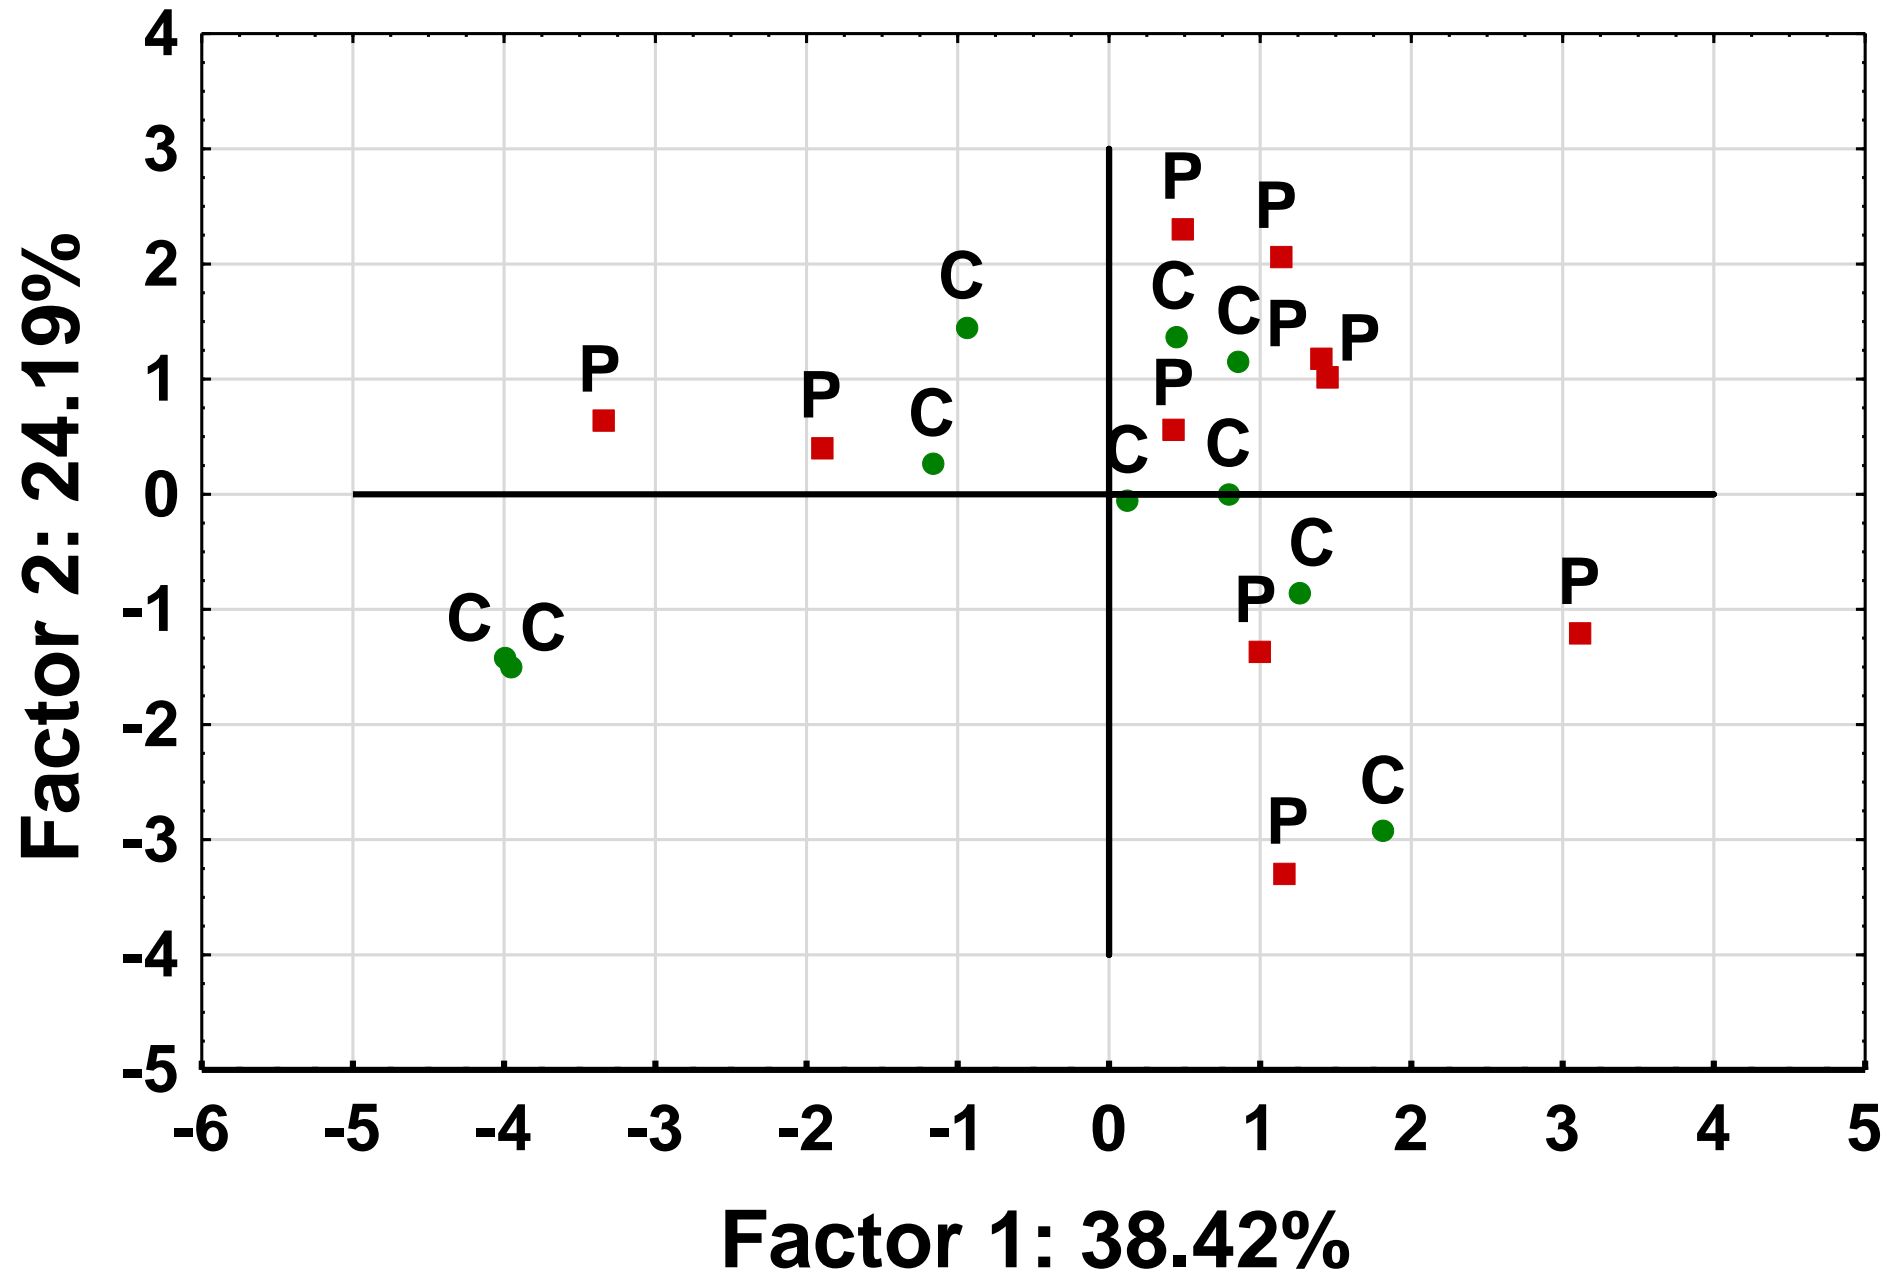

# Greenhouse / Wendy / Clonoplus

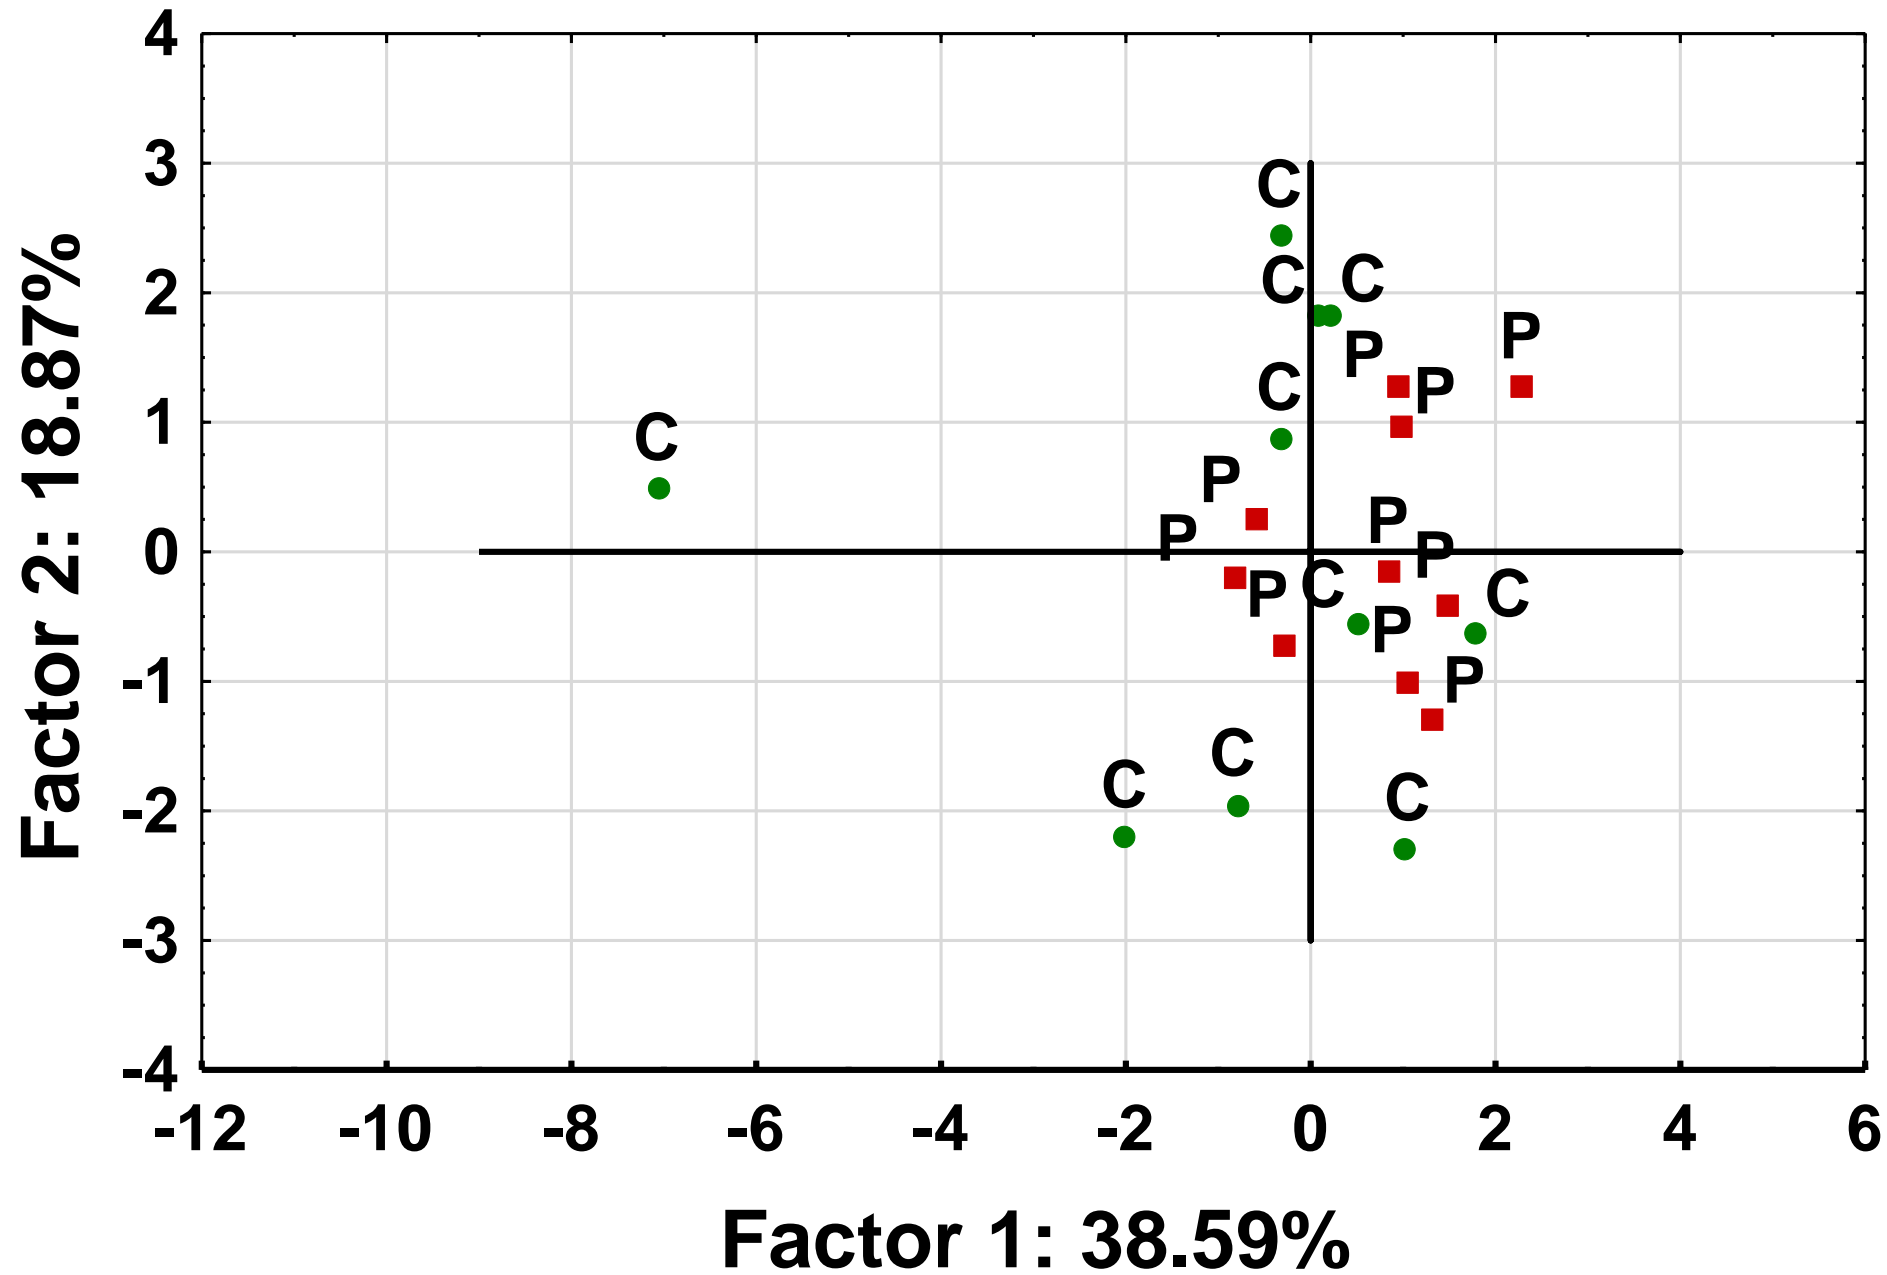

# Greenhouse / Wendy / Prometheus

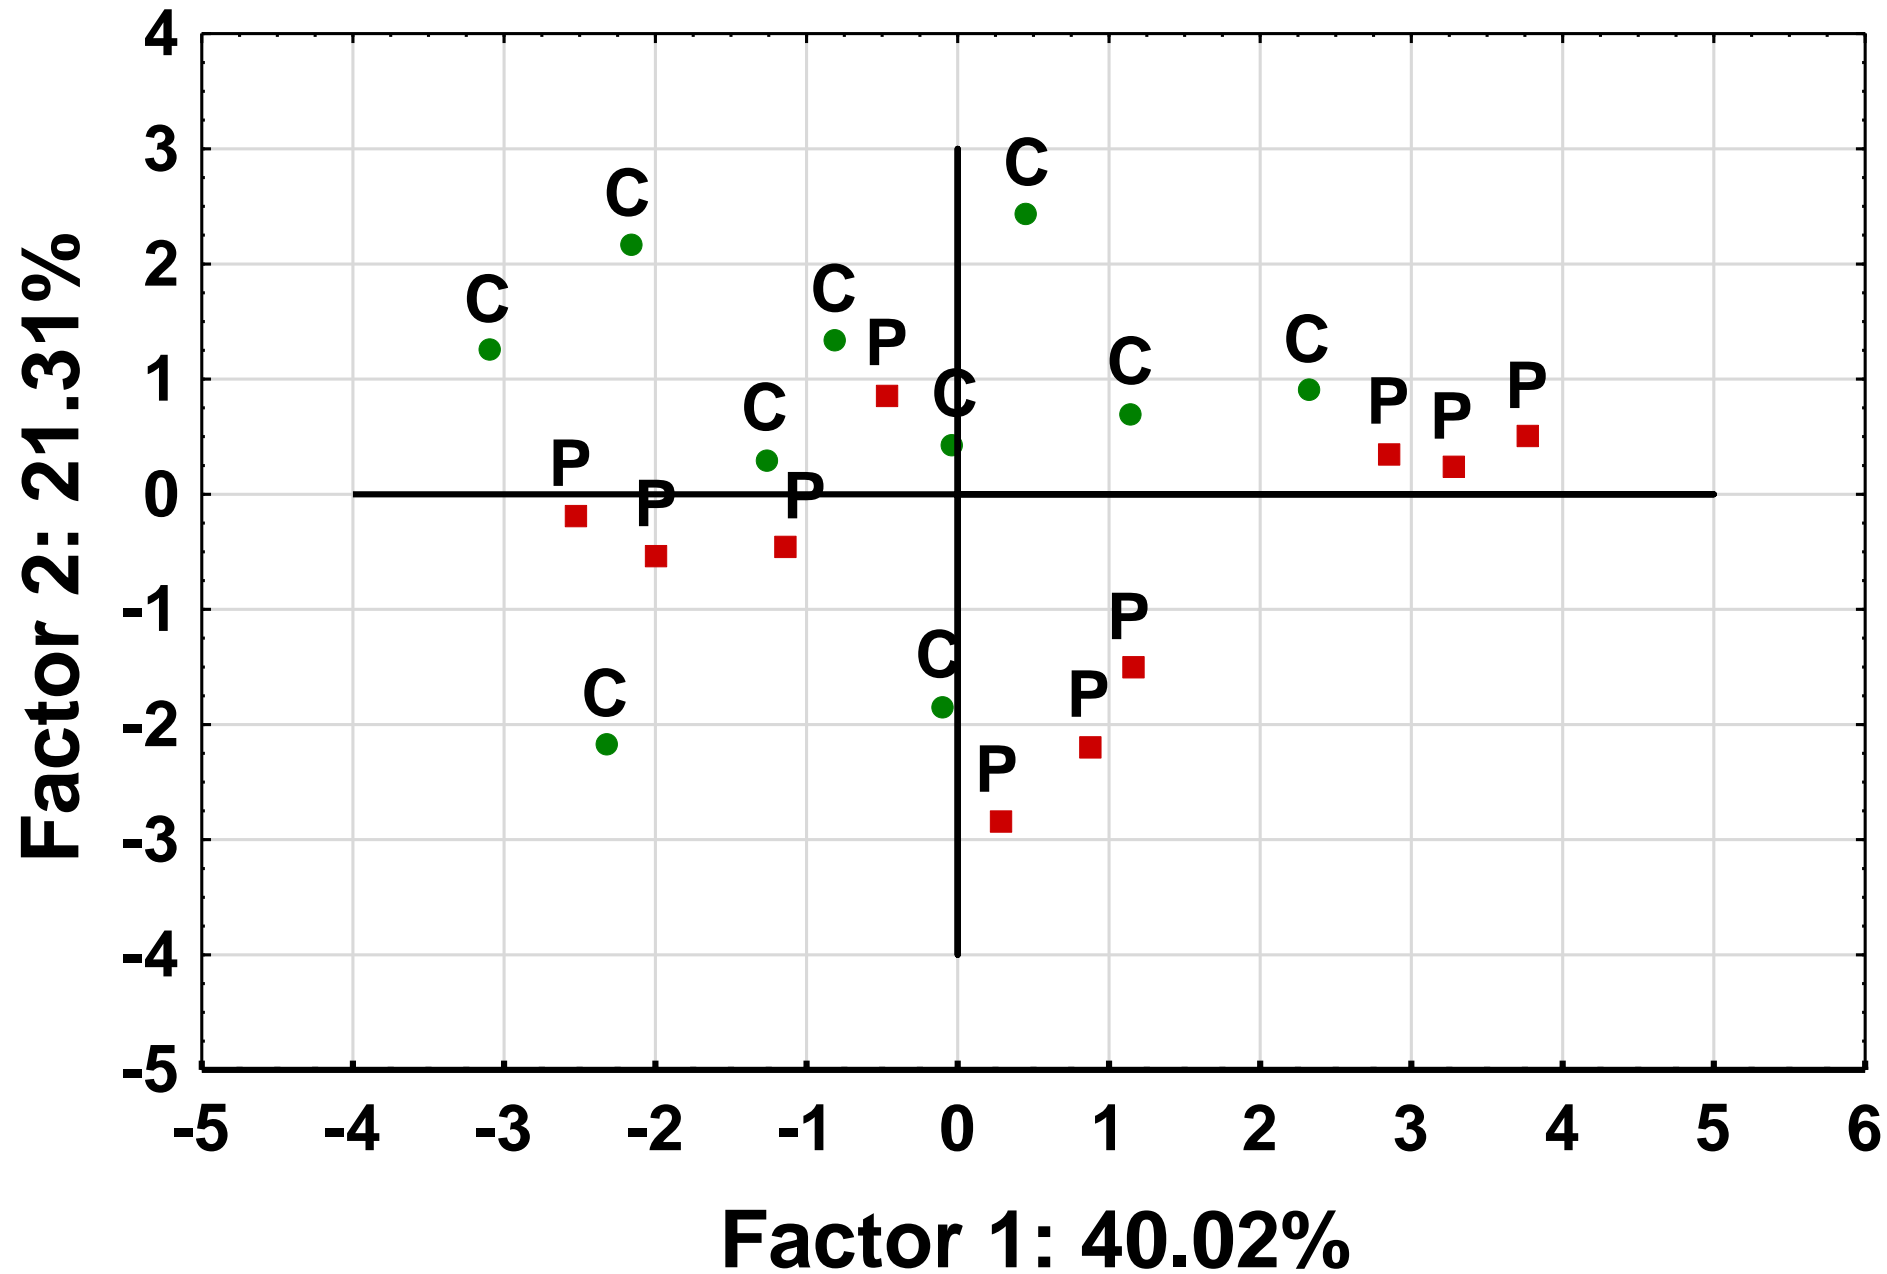

# Greenhouse / Wendy / Polyversum

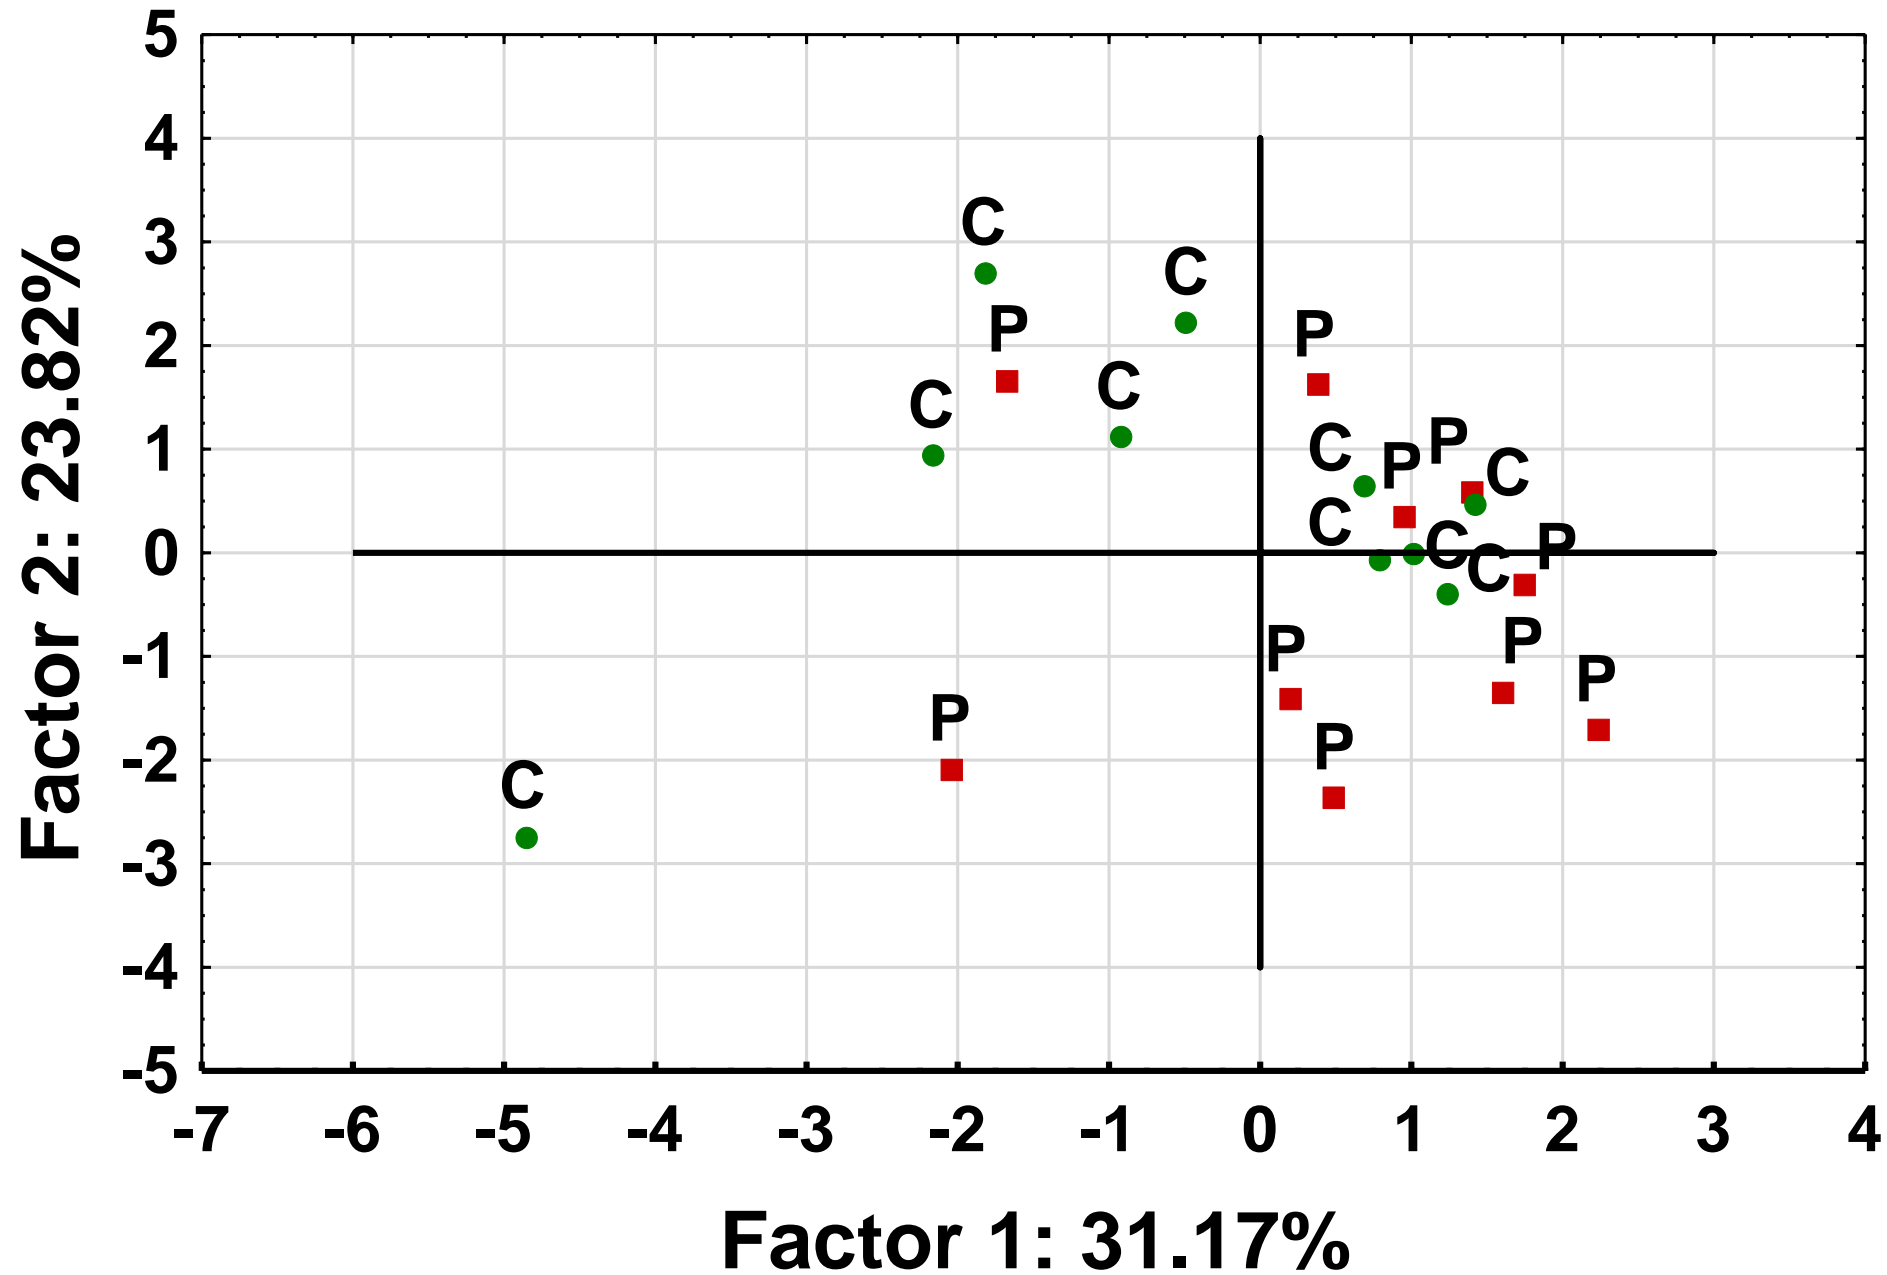

# Greenhouse / Wendy / Hirundo

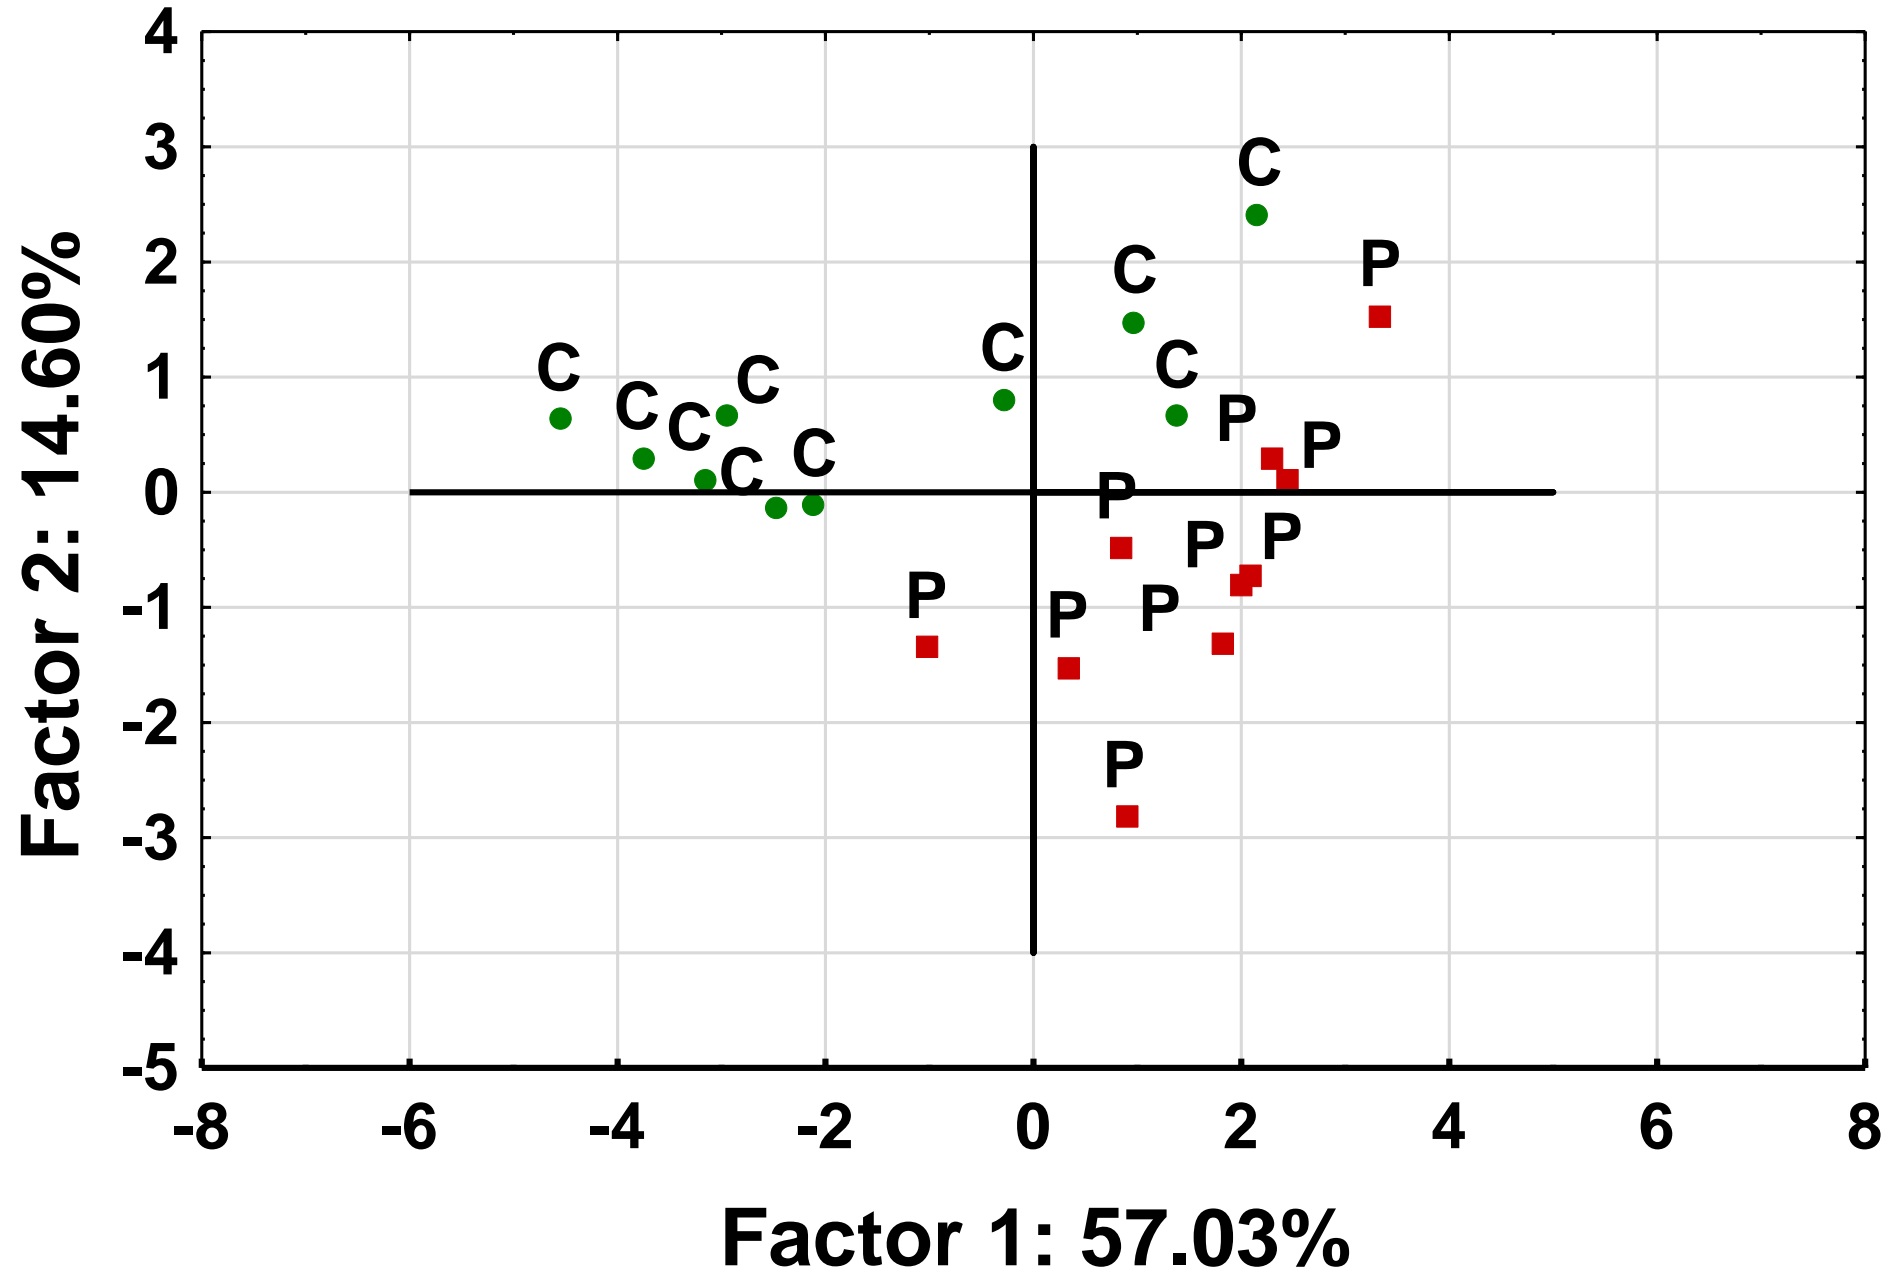

Supplement: s1 [file s1]
